# Supplementary material for: Post translational modification-assisted cancer immunotherapy for effective breast cancer treatment
Source: Royal Society of Chemistry journal article supplement (doi:10.1039/d0sc02803g), 2020-01-01
Supplement: d0sc02803g1.pdf [file d0sc02803g1.pdf]

## Electronic Supporting Information

### Post Translational Modification-Assisted Cancer Immunotherapy for Effective Breast Cancer Treatment

Shevanuja Theivendran, Jie Tang, Chang Lei, Yannan Yang, Hao Song, Zhengying Gu, Yue Wang, Yang Yang, Lei Jin, Chengzhong Yu.

#### Material and Methods

Material:

Cetyl trimethylammonium bromide (CTAB), sodium salicylate (NaSal), tetraethyl orthosilicate (TEOS), triethanolamine (TEA), titanium (IV) chloride ( $\text{TiCl}_4$ ), Dopamine hydrochloride, tris(hydroxymethyl)aminomethane and doxorubicin (DOX) were purchased from Sigma-Aldrich. PD-L1, CD86, MHC I, MHC II, CD4, CD8, CD11c, and F4/80 antibodies were purchased from Biolegend. All chemicals were used as received without purification. Immunoprecipitation kit was purchased from abcam.

#### Synthesis of Dendritic mesoporous silica nanoparticles (DMSN)

DMSNs were synthesized following a reported procedure<sup>1</sup>. A typical synthesis of DMSNs was performed as follows. At first, 0.070 g of TEA were added to 25 ml of water and stirred gently at 80 °C in a water bath under a magnetic stirring for 0.5 h. Thereafter, 380 mg CTAB and 168 mg NaSal was added to the above solution and kept stirring for another 1h. Then, a mixture of 4 ml TEOS and 0.5 ml of ethanol were added to the water-CTAB-NaSal-TEA solution with gentle stirring (~ 300 rpm) for 2.5 h. The products were collected by high speed centrifugation and washed several times with ethanol to remove the residual reactants, followed by drying in vacuum at

room temperature overnight. The final products were obtained after calcination at 550 °C for 5 h.

#### Synthesis of Titanium modified dendritic mesoporous silica nanoparticles (TiDMSN)

TiDMSN was synthesized following a reported procedure with modifications<sup>2</sup>. Briefly, 30 mg of DA·HCl was dissolved in 50 mL of Tris buffer (10 mM, pH 8.5) by 5 min ultrasonication, and then 50 mg of DMSN was added and sonicated for another 5 min. The above solution was transferred into a 100 mL flask and stirred for 12 h at 30 °C. The products were collected by centrifugation, washed with water several times and dried in vacuum oven (The product is labelled as PDA-DMSN). Finally, the PDA-DMSN were incubated in TiCl<sub>4</sub> solution (75 mM) for 2 h to immobilize Ti<sup>4+</sup> cations. The products were washed with deionized water.

Preparation of fluorescent labelled nanoparticles: IR-780 iodide dye post modification on the nanoparticles was performed following a reported procedure.<sup>3</sup> In short, IR780 (300 mg) was dissolved in 10 mL of anhydrous DMF in a round-bottom flask. Triethylamine (200 μL) and 12-aminododecanoic acid (254 mg) were added and the solution was heated for 3 hours at 85°C under a nitrogen environment. NHS (20 mg) was dissolved in 1 mL of acid-conjugated dye solution in DMF (30 mg/mL), after which EDC (60 mg) dissolved in 400 μL of 25 mM MES buffer, pH 6.5, was added to the dye solution. After 15 minutes of stirring, 50 μL of APTES was added to this solution, and the reaction proceeded for ~2 hours. 4 mg of nanoparticles were mixed with the 250 μL of above APTMS conjugated dye solution and diluted to 1 mL with DI water and stirred for 1 day at room temperature. The particles were collected by centrifugation and washed with water.

Characterization: Transmission electron microscopy (TEM) images were obtained with a JEOL 1010 operated at 100 kV. SEM images were obtained using JEOL JSM 7001 field-emission SEM (FE-SEM) operated at 15 kV. EDS mapping was conducted from JEOL 2100 operated at 200 kV. Nitrogen adsorption–desorption isotherms were measured at 77 K using a Micromeritics ASAP Tristar II 3020 system. The samples were degassed at 393 K overnight on a vacuum line. The pore size distribution curve was derived from the adsorption branch of the isotherms using the Barrett–Joyner–Halanda (BJH) method. The Brunauer–Emmett–Teller (BET) method was utilized to calculate the specific surface areas. The total pore volume was calculated from the amount adsorbed at a maximum relative pressure ( $P/P_0$ ) of 0.99. Mass spectrometry was performed on Orbitrap Elite with ETD. X-ray photoelectron spectra (XPS) were collected on a Kratos Axis Ultra X-ray photoelectron spectrometer (PerkinElmer). Dynamic light scattering (DLS) and Zeta potential were carried out at 25 °C using a Zetasizer Nano-ZS from Malvern Instruments. TGA measurement was performed on TGA/DSC 1 (Mettler-Toledo AG) at a heating rate of 2 °C min<sup>-1</sup> under an air flow of 20 ml min<sup>-1</sup>. Live imaging of animals was performed using IVIS Lumina X5 Imaging system.

Cell viability Test: The HEK cell viability of the TiDMSN and DMSN were determined by the MTT colorimetric assay. Cells (8000 per well) were seeded in a flat bottomed 96-well plate and incubated at 37 °C and in 5% CO<sub>2</sub>. Cells were exposed to nanoparticles in a dose dependent manner for 24 h. Following treatment completion, cells were incubated with MTT reagent (20 µL/well volume from 5 mg/ml solution in PBS) for 4 h at 37 °C. Then 200 µL of dimethyl sulfoxide (DMSO) was added to each well and mixed to dissolve the formazan crystal. The optical density

(OD) was recorded at 570 nm in a microplate reader and the percentage of residual cell viability was determined.

Antigen enrichment analysis: 4T1 cells were seeded in a 100 mm petri dish at a density of  $1.5 \times 10^6$  and incubated for 24 h at 37 °C and 5% CO<sub>2</sub>. Then, the cell culture media was supplemented with 1× Halt Protease, and Phosphatase Inhibitor Cocktail (ThermoFisher Scientific) and Dox was added at a concentration of 10 µg/ml and incubated for 6-8 h. Then the cell culture media was collected and centrifuged at 13000 RPM for 20 min. The supernatant was collected and stored at -20 °C until further analysis. For preparing tumor lysates without Dox treatment, 4T1 cells were collected and frozen at -80 °C and thawed at room temperature. Then the supernatant was collected by centrifugation at 13000 RPM for 20 mins and stored in -20 °C until further analysis. The concentration of proteins in the tumor lysates collected in the previous step was analyzed by Pierce Coomassie (Bradford) Protein Assay (Thermo Fisher) and diluted to 10 µg/ml prior to the adsorption experiment and stored at 4 °C until use. In a typical enrichment test, 0.5 mg of nanoparticle was mixed with 1 mL of the above solution using vortex mixer and incubated at 4 °C in a rotatory mixer for at least 4 h. In the next step, the particles were collected by centrifugation and the supernatant was saved and stored in ice for subsequent protein quantification. The proteins bound to the nanoparticles were eluted using ACN for 20 min at room temperature. The ACN supernatant was collected by centrifugation. The collected supernatant was processed for the subsequent mass spectrometry analysis on Orbitrap Elite with ETD following the filter assisted sample preparation (FASP) reported previously.<sup>4</sup>

Identification of TA: Raw data files were processed using Proteome Discoverer (PD) version 2 (Thermo Scientific). Peak lists were searched against a Reviewed Mouse Uniprot database

(downloaded in 2018) using Sequest. The parameters used to identify tryptic peptides for the protein identification were a 50 ppm precursor-ion mass tolerance, 0.15 Da product-ion mass tolerance, up to two missed trypsin cleavage sites, carbamidomethyl set as static modification and the oxidation, deamidated, acetyl and phosphorylation set as a dynamic modification. The Percolator node within PD was used to calculate the peptide false discovery rates (FDR), and a 5% FDR was used to filter all the results. The proteins identified with  $\geq 2$  peptides were reported. The data obtained after the database search was further scrutinized for the presence of previously reported tumor antigens based on literature. Data-independent acquisition (DIA) based sequential window acquisition of all theoretical mass spectra (SWATH-MS) analysis was used for the calculation of relative abundance of proteins based on peak area and the abundance relative to total protein abundance in a sample.

Antigen enrichment for *in vitro* and *ex vivo* experiments: The tumor lysates are prepared as per the description above. Various concentrations of nanoparticles are incubated with 0.5 mL of tumor lysates and incubated at 4 °C for at least 4 h. The supernatants were collected for analysis with BCA kit. Then, the nanoparticles were collected by centrifugation and washed with distilled water once and re-suspended in saline at required concentrations.

Immunoaffinity separation of MHC Class I bound peptides: The MHC class I molecules were isolated and the associated peptides extracted as previously described<sup>5</sup>. RAW cells seeded in five 150 mm dishes at the seeding density of  $5 \times 10^6$  in DMEM media supplemented with 10% FBS, 100 U/ml penicillin, and 100 mg/ml streptomycin (Gibco®, Life technologies). Antigen enriched TiDMSN was added to each dish and incubated for 20 h. Before lysis, all cells were washed twice with PBS. Cells were lysed for 20min on ice in 20mM Tris-HCl (pH 8), 150mM NaCl, 1% (w/v)

CHAPS, 0.2mM PMSF, 1× Halt Protease, and Phosphatase Inhibitor Cocktail (ThermoFisher Scientific) supplemented with complete Protease Inhibitor Cocktail (abcam). Abcam immunoprecipitation kit (ab206996) was used for further processing. The lysate was subjected to centrifugation (30 min, 13200 RPM at 4 °C) and the resulting supernatant was pre-cleared for 30min using normal rabbit serum and Protein A/G Sepharose beads. For MHC-1 immunoprecipitations, the pre-cleared lysate was incubated with the H-2Ld/H-2Db, H-2kb coupled to Protein A/G Sepharose beads for 5 h at 4 °C. After immunoprecipitation, the beads were washed with TBS (pH 7.4) and peptides were eluted from the purified MHC molecules using 100 mM glycine/HCl. Eluted peptides were further purified with a 10 kDa molecular weight cut-off size filter and de-salted on C18-based STAGE tips. Finally, analyzed with Liquid Chromatography with tandem mass spectrometry (LC MS/MS).

*Ex vivo* maturation of APCs: Spleens from naïve mice were passed through a cell strainer to obtain single cell suspension, and red blood cells were lysed using erylysis buffer (Sigma–Aldrich). The resulting cells were seeded in a 12-well plate at a density of  $2 \times 10^5$  cells/well in DMEM media supplemented with 10% FBS, 100 U/ml penicillin, and 100 mg/ml streptomycin (Gibco®, Life technologies). PBS, different antigen enriched nanoparticle formulations were added at a concentration of 25 µg/ml to the wells and incubated for 24 h. The cells were recovered from the plate and incubated with Fc-block for 20 min at 4 °C, centrifuged and resuspended in a buffer containing CD11c, F4/80, CD86, MHC Class I and MHC Class II (BioLegend) antibodies for 30 min at 4 °C. The cells were then centrifuged and resuspended in 0.5 mL of FACS buffer (PBS, 0.02% sodium azide, 0.5% BSA) and analyzed using LSR II flow cytometer (BD Biosciences).

In vitro cytokine secretion measurement: The RAW 264.7 macrophages were seeded in 12 well plate at a density of  $2 \times 10^5$  cells/well. For measuring IL-1 $\beta$  and IL-6, the cells were pre-treated with lipopolysaccharide (LPS, 25 ng/ml) for 3 h before exposure to  $100 \mu\text{g mL}^{-1}$  nanoparticles for 6 h and the supernatant were collected before analysed by ELISA.

In vitro endosomal escape study: Tumor lysate protein solution was labelled with FITC following a reported procedure<sup>6</sup>. In short, 25  $\mu\text{L}$  of fluorochrome dissolved in dimethyl sulfoxide (3mg/ml) was added to 1 ml of protein solution and incubated for 1h at 4 °C. FITC labelled protein solution was washed with distilled water many times using Millipore 3kDa centrifuge columns as per manufacturer's instructions. FITC labelled protein solution was then incubated with nanoparticles for the subsequent enrichment. The antigen enriched nanoparticles were washed with distilled water and resuspended in distilled water at a certain concentration. Raw cells were seeded in a 12 well plate at a seeding density of  $2 \times 10^5$  per well. After 24 h, the medium is replaced with fresh media and FITC labelled antigen enriched nanoparticles were added at a concentration of 25  $\mu\text{g/ml}$  and further incubated for another 6H. Cells were washed twice with PBS and incubated with LysoTracker Red as per manufacturer's instructions for 0.5 h, then washed with PBS twice, fixed with Paraformaldehyde (4%), stained with DAPI, and observed under CLSM using 405 nm, 488 nm, and 680 nm lasers.

*In vivo* experiment details: For xenograft bilateral tumor model,  $2 \times 10^6$  4T1 cells were suspended in PBS and subcutaneously injected in the right flank of BALB/c mice on day -7 (primary tumors) and  $4 \times 10^5$  4T1 cells were subcutaneously injected in the left flank on day -5 (distant tumors). The right-flank tumors (primary tumors) were intratumorally injected with different formulations (25 mg/kg of nanoparticles, 2.5 mg/kg of DOX) on days 0, 2 and 4. The

checkpoint blockade PD-L1 antibody (2.5 mg/kg) were intraperitoneally injected into the animals on days 1, 3 and 5. The mice were euthanized on day 12 according to the institutional animal ethics. The distant tumors were collected to analyze the infiltration of T cells. Blood was collected from each group to measure the IFN- $\gamma$  in the serum using the enzyme-linked immunosorbent assay (ELISA). Distant tumor samples were also collected, weighed, washed with PBS, fixed in the 4% paraformaldehyde and sectioned for H&E, TUNEL, CD8, CD4, and TNF- $\alpha$  staining. Other major organs, including heart, liver, spleen, and kidneys were also harvested, fixed in 4% paraformaldehyde, sectioned, and stained with H&E for evaluating the metastasis and toxicity of the nanoformulation. The tumor volume (V) was calculated using  $V=L \times W^2/2$ , where W is the tumor width dimension and L the tumor long dimension.

*In vivo* CTL infiltration test: Distant tumors were harvested on days 12 post-tumor inoculation for a flow cytometric analysis of the *in vivo* experiments. The tumors were homogenized to produce single cell suspension. The cells were washed twice in PBS plus 1 % BSA by centrifugation at 1200 RPM for 5 min. The resuspended cell pellet was treated with 1 mL of red blood cells (RBCs) lysis buffer for 5 min to lyse RBCs. The reaction was stopped by adding RPMI 1640 supplemented with 10% FBS, and the cells were washed twice in PBS plus 1 % BSA. Trypan blue was applied for live/dead cell discrimination during cell counting. Before the surface staining, the samples were incubated with Fc Block for 10 min on ice, followed by surface staining with anti-mouse CD3, CD8 and CD4 on ice for 20 min. Wash again with PBS and analyse in flow cytometry.

*In vivo* spleen maturation test: Spleens were harvested on days 12 post-tumor inoculation for a flow cytometric analysis of the *in vivo* experiments. Single-cell suspensions were prepared via passing through a cell strainer. The cells were washed twice in PBS plus 1 % BSA by centrifugation



at 1200 RPM for 5 min. The resuspended cell pellet was treated with 1 mL of red blood cells (RBCs) lysis buffer for 5 min to lyse RBCs. The reaction was stopped by adding PBS, and the cells were washed twice in PBS plus 1 % BSA. Trypan blue was applied for live/dead cell discrimination during cell counting. Before the surface staining, the samples were incubated with Fc Block for 10 min on ice, followed by surface staining with anti-mouse CD11c, F4/80 and CD86 on ice for 20 min. Wash again with PBS and analyze in flow cytometry.

Intratumoral nanoparticle content: In a bilateral tumor model, PBS or different nanoparticle formulations at the dosage of 25 mg/kg were intratumorally injected into the primary tumor. After 4 days, the primary and distant tumors were collected, cut into small pieces and dissolved in concentrated nitric acid. The silicon contents in each tissue were quantified by ICP-OES and calculated based on the injection dose and weight of tissues. The final values were obtained by subtracting the silicon contents in the control groups.

Ingenuity pathway analysis: The selected genes were analyzed using Ingenuity Pathway Analysis software. Pathways and Diseases and Disorders, which were predicted to be influenced by the differentially enriched proteins by TiDMSN and DMSN, were ranked in order of significance.

*In vivo* live imaging and immune cell mediated delivery of fluorescent labelled nanoparticles:  $2 \times 10^6$  4T1 cells were suspended in PBS and subcutaneously injected in the right flank of BALB/c mice. On day 7, fluorescent labelled nanoparticles mixed with Dox (25 mg/kg of nanoparticles, 2.5 mg/kg of DOX) were injected intratumorally and imaged in a time dependent manner using IVIS Lumina X5 Imaging system. Tumors and proximal lymph nodes were collected on day 5 and the single cell suspensions were analyzed using flow cytometry.

*In vivo* CRT exposure measurement:  $2 \times 10^6$  4T1 cells were suspended in PBS and subcutaneously injected in the right flank of BALB/c mice. On day 7, nanoparticles mixed with Dox (25 mg/kg of nanoparticles, 2.5 mg/kg of DOX) were injected. Tumors were collected and the single cell suspensions were analyzed using flow cytometry 24 h post injection.

Live subject statement: This study was performed in strict accordance with the Animal Care and Protection Act (2001, Queensland, Australia) and was approved by the Institutional Animal Ethics Committee of University of Queensland Biological Resources (UQBR, Australia).

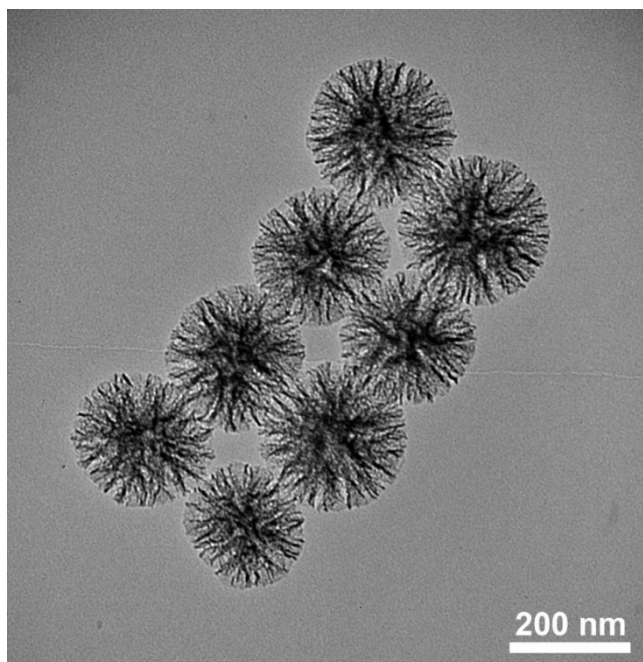

Fig. S1: TEM image of DMSN

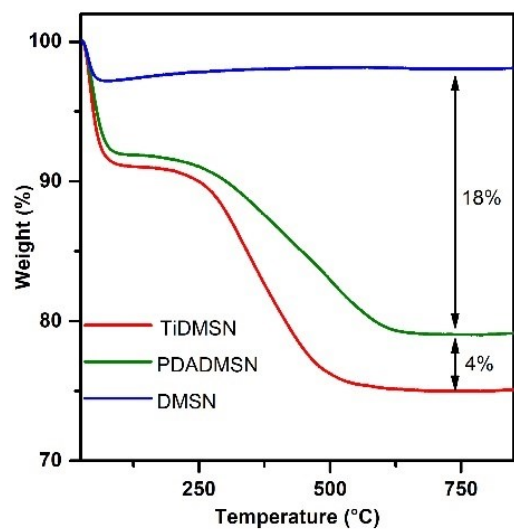

Fig. S2: Thermogravimetric analysis of different nanoparticle formulations.

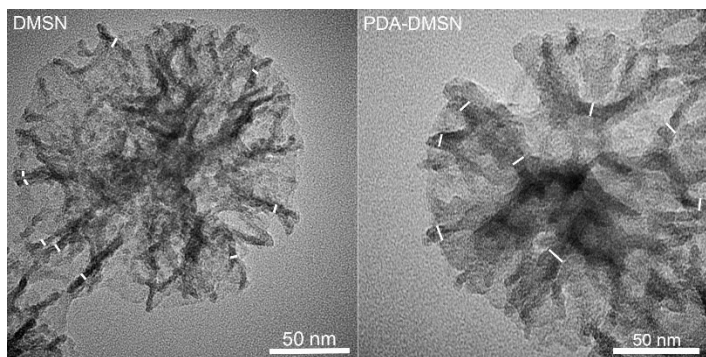

Fig. S3: High magnification TEM images of DMSN and PDADMSN.

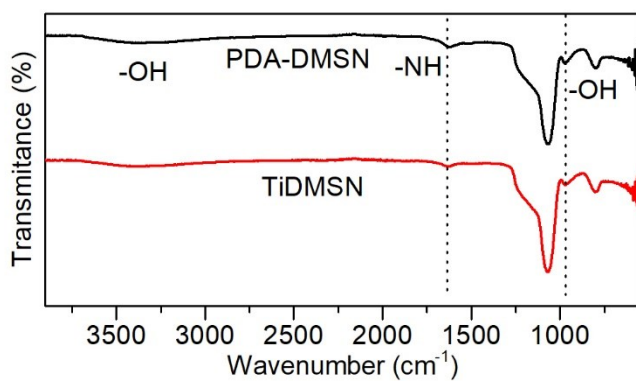

Fig. S4: ATR-FTIR of TiDMSN and PDA-DMSN.

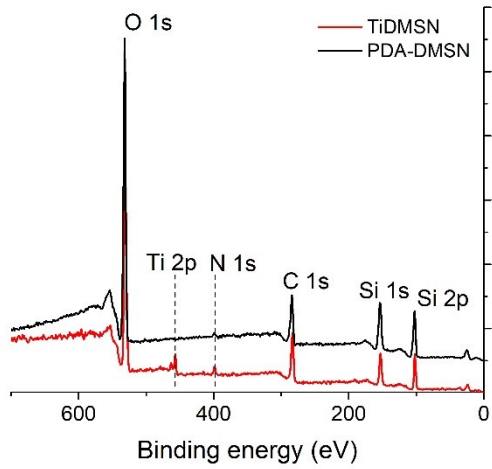

Fig. S5: XPS of TiDMSN and PDA-DMSN

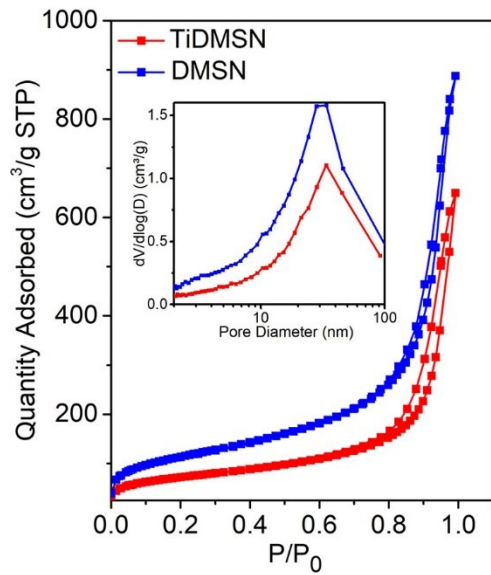

Fig. S6: Nitrogen sorption isotherms and pore size distribution curves of TiDMSN and DMSN.

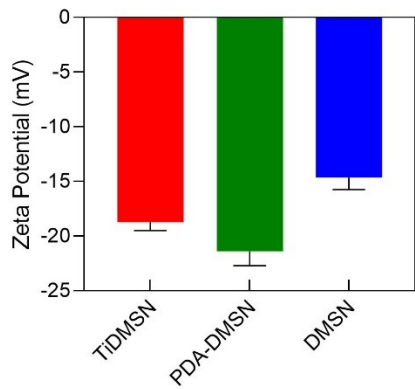

Fig. S7: The zeta potential for TiDMSN, PDA-DMSN and DMSN at pH 7.

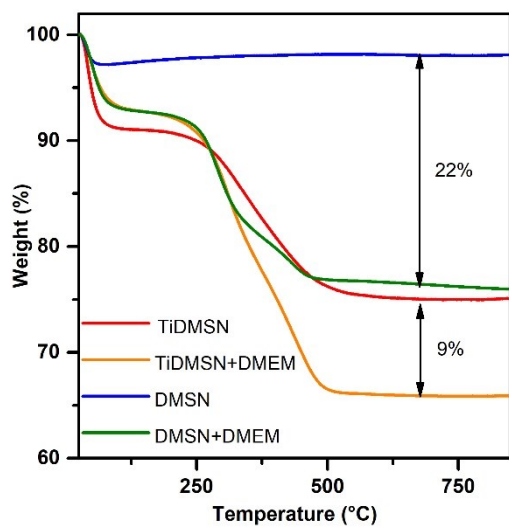

Fig. S8: Thermogravimetric analysis of as-prepared nanoparticles and after incubation in DMEM+FBS.

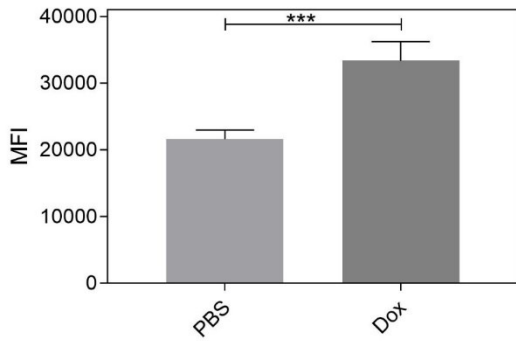

Fig. S9: *In vitro* quantitative analysis of CRT exposure level using flow cytometry.

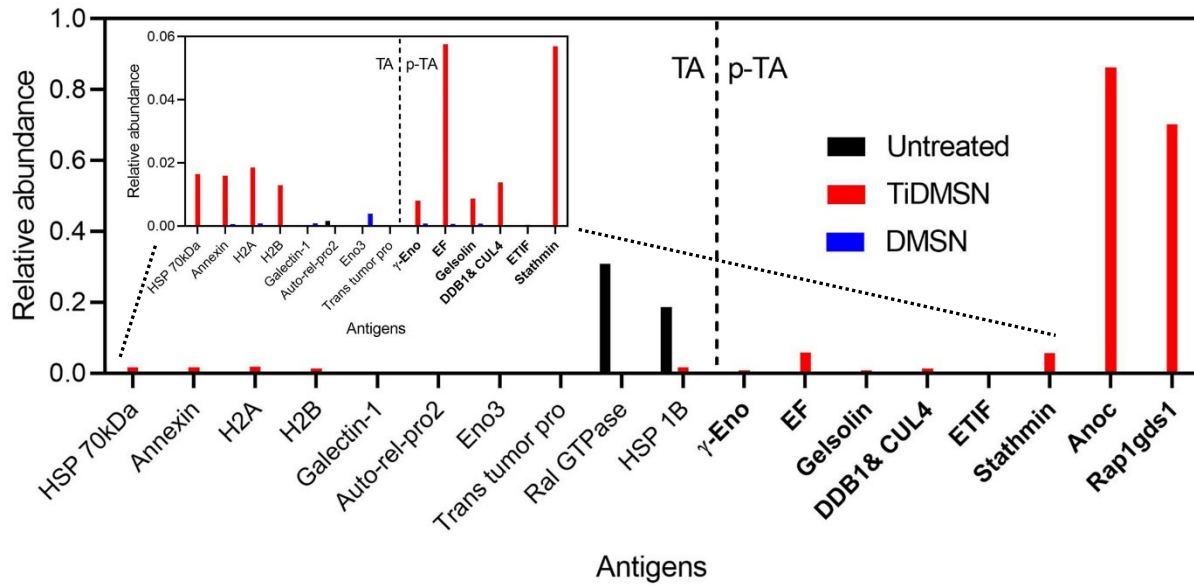

Fig. S10: Relative abundance of TA and p-TA enriched by different nanoparticle formulation.

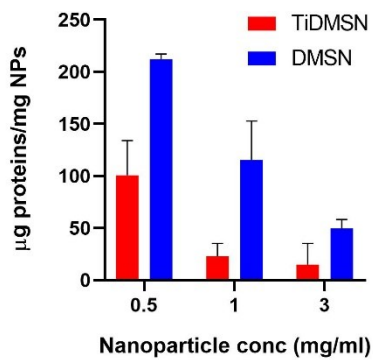

Fig. S11: Protein adsorption capacity at different nanoparticle concentrations of TiDMSN and DMSN.

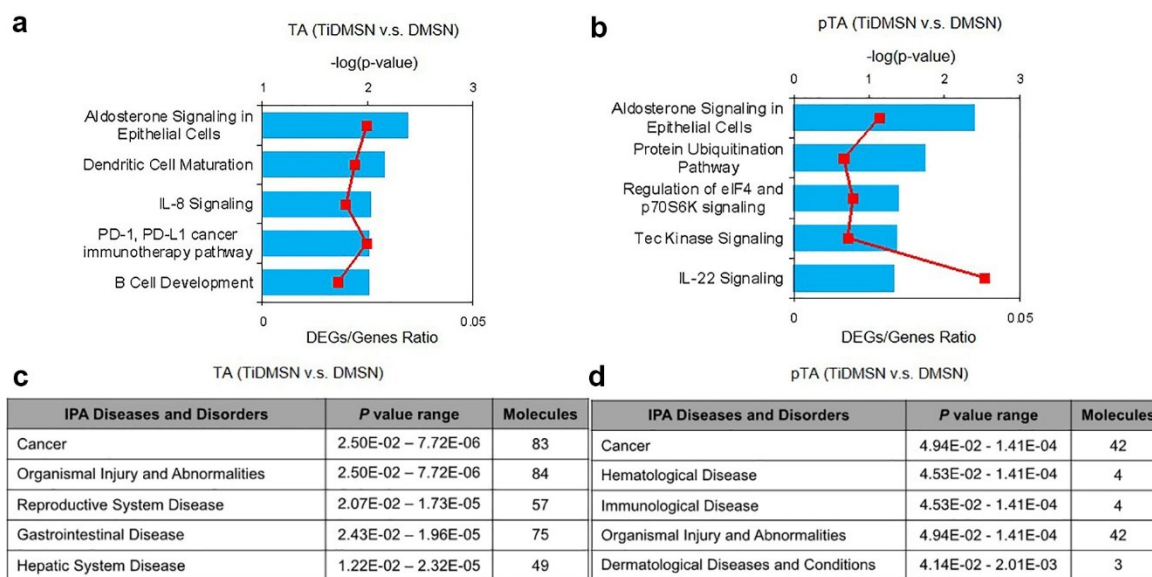

Fig. S12: Top five pathways (a,b) and table summarizing the top five related diseases and disorders (c,d) identified from the proteomics data of TA and p-TA enriched by TiDMSN and DMSN using IPA. DEGs: differentially expressed genes.

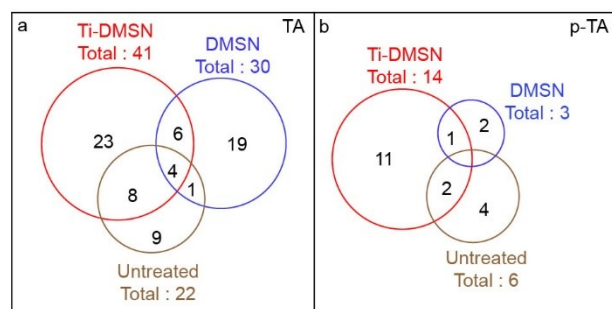

Fig. S13: Number of TA (a) and phosphorylated TA (b) enriched by different nanoparticle formulations without the ICD induction.



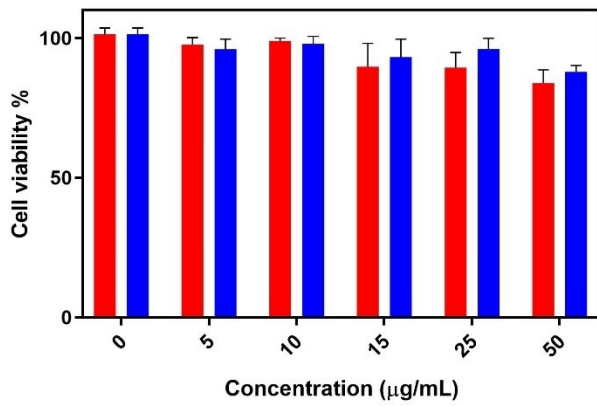

Fig. S14: RAW cell viability after 24 h treatment of TiDMSN and DMSN at various concentrations

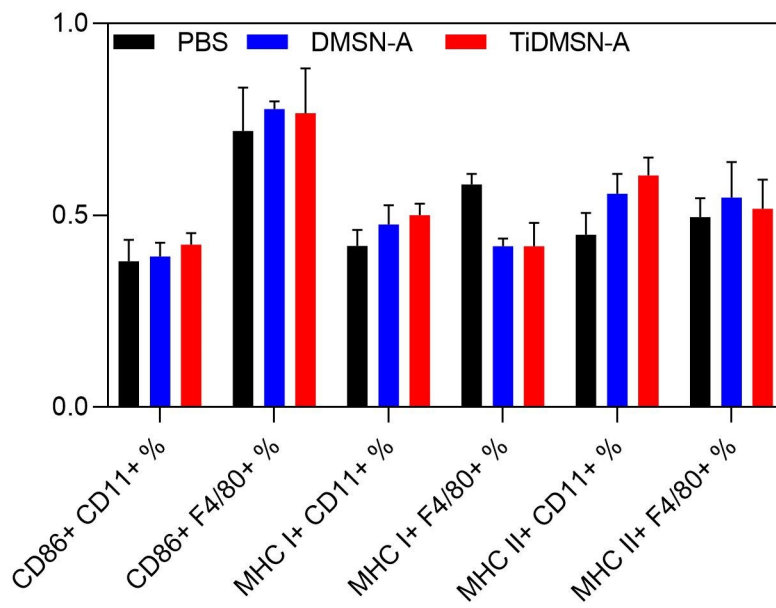

Fig. S15: Flow cytometry analysis of CD 86, MHC Class I and MHC Class II expression on splenocytes treated with PBS or different nanoparticle formulations before antigen enrichment. Macrophages were marked by F4/80 antibody and the dendritic cells were marked by CD 11c antibody.

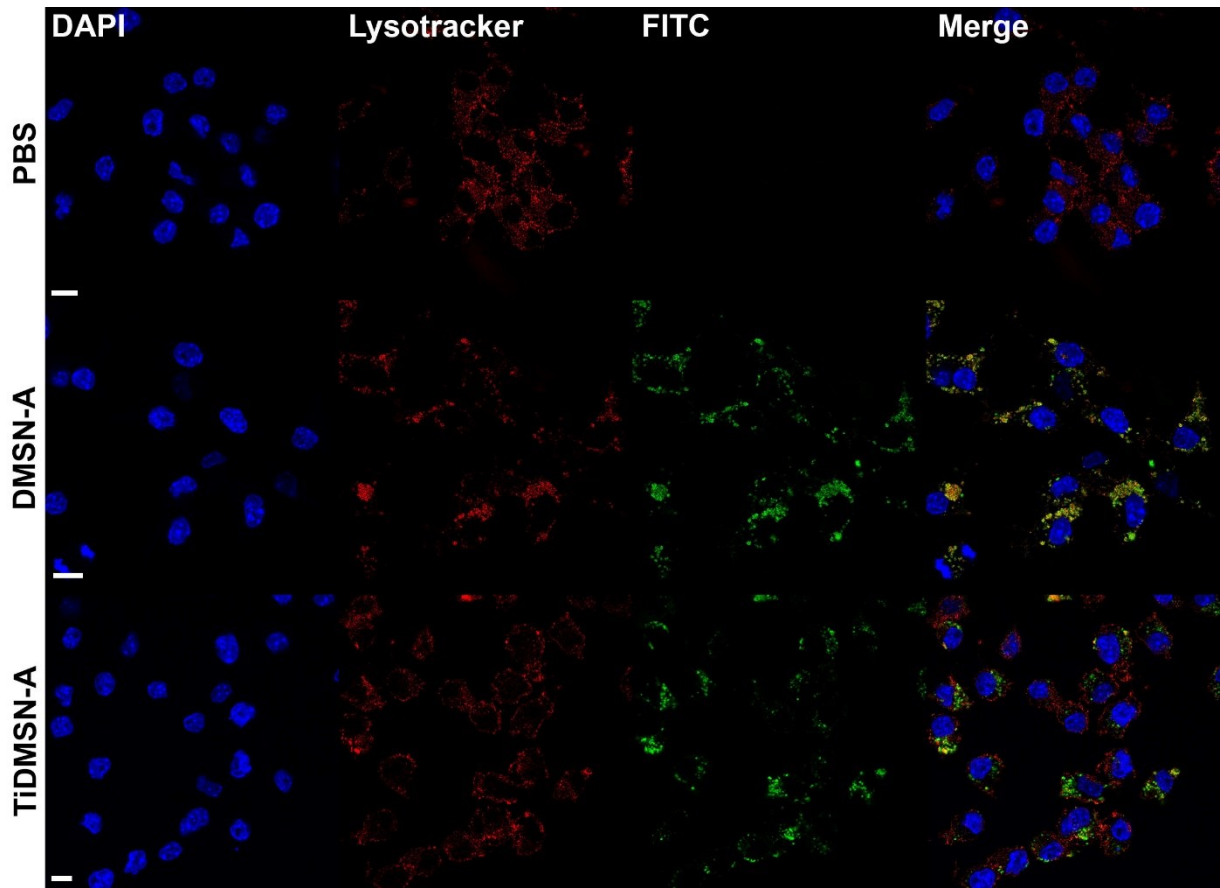

Fig. S16: CLSM images for analyzing the endosomal escape of the antigen enriched nanoparticles.

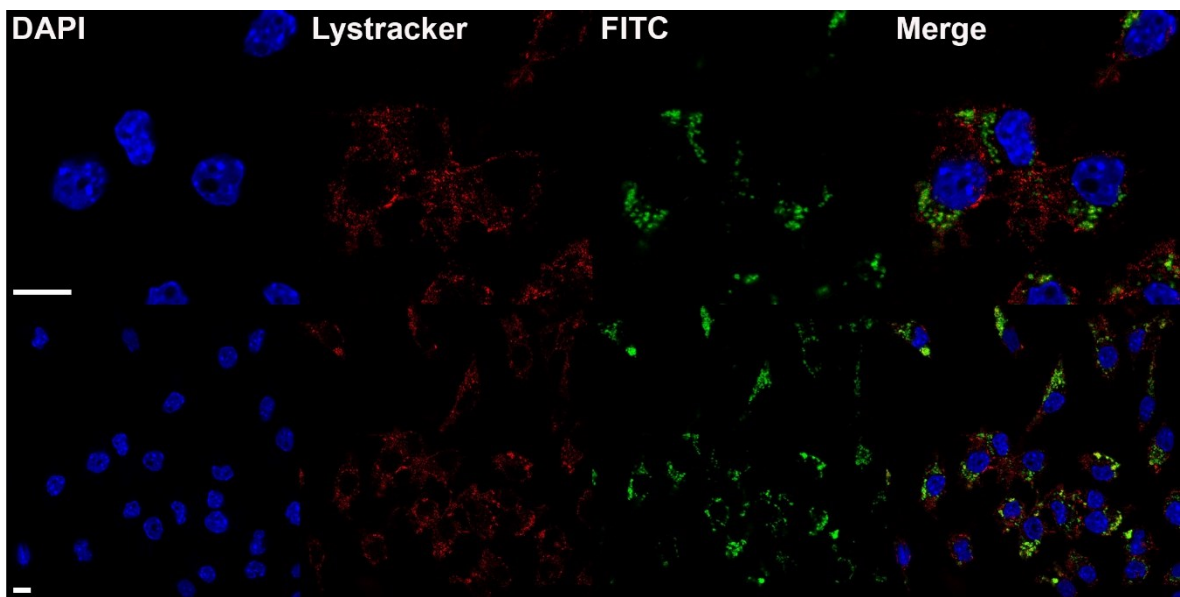

Fig. S17: CLSM images for the endosomal escape of the antigen enriched PDA-DMSN-A.

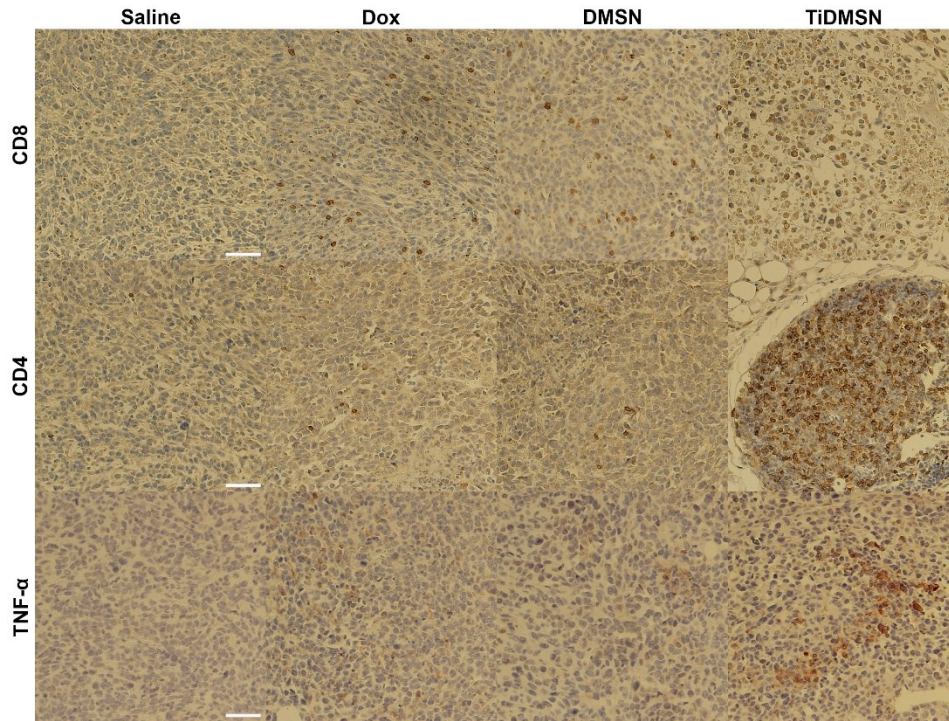

Fig. S18: Immunohistochemistry staining for CD8, CD4 and TNF- $\alpha$  expression (labelled with DAB brown) in the secondary tumor site. Scale: 50  $\mu$ m.

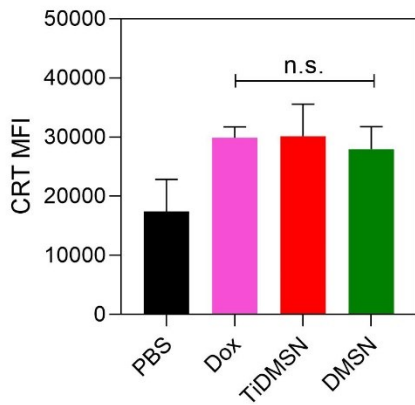

Fig. S19: *In vivo* CRT exposure measurement using flow cytometry

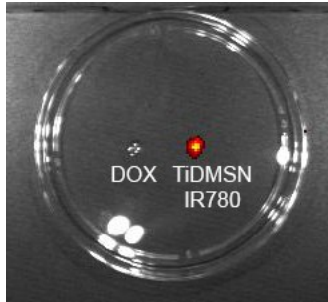

Fig. S20: Characterization of fluorescence emitted from Dox and IR-780 conjugated TiDMSN excited at 710 nm using IVIS imaging system.

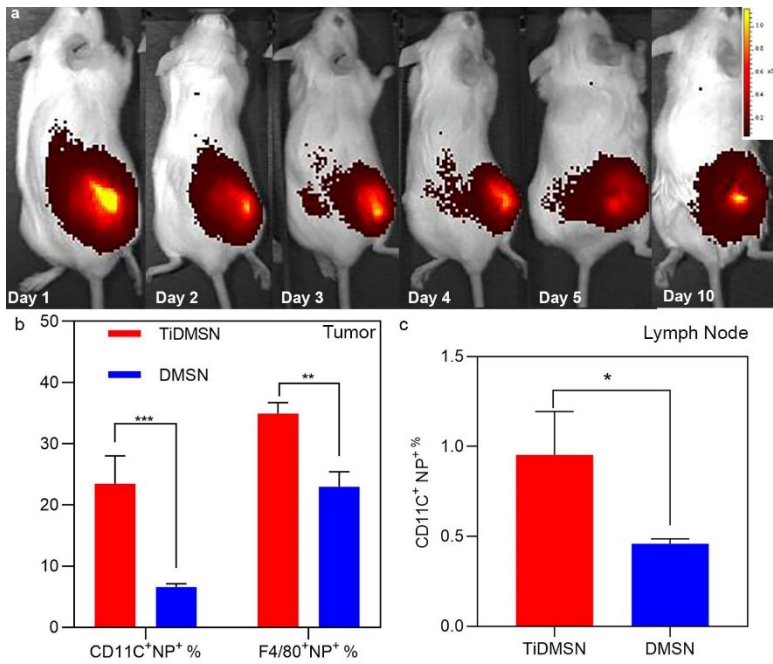

Fig. S21: Time dependent live imaging of fluorescent labelled nanoparticles for TiDMSN injected mice (a). Flow cytometric analysis for the percentage of immune cells with fluorescent labelled nanoparticles in tumor site (b) and proximal lymph nodes (c).

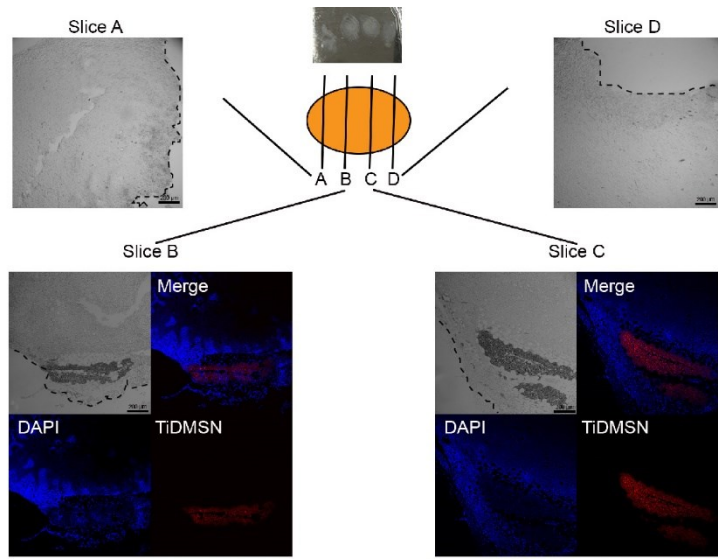

Fig. S22: CLSM characterization for tumor site distribution of fluorescent labelled nanoparticles. The whole tumor was sliced and sectioned at four positions, namely Slice A-D and nanoparticles were found in Slice

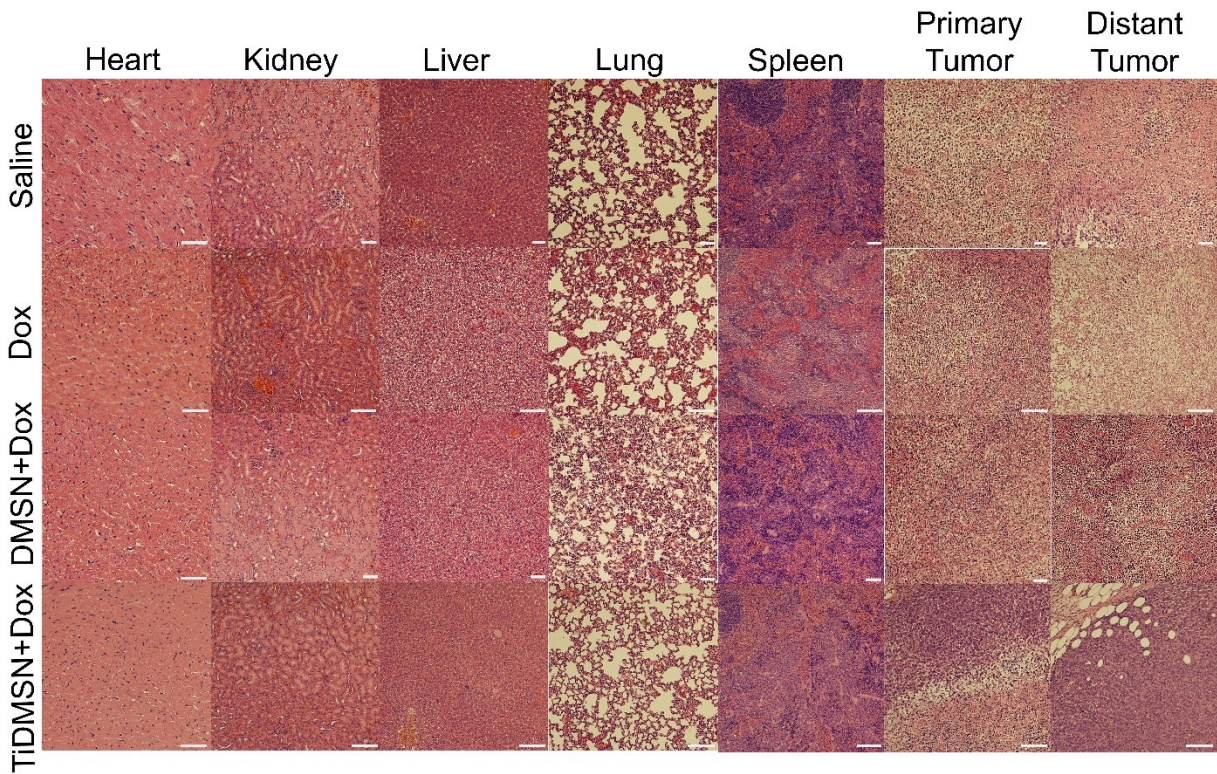

B and Slice C. Scale: 200  $\mu$ m; Tissue boundaries are marked by dashed lines.

Fig. S23: H & E staining of major organs and tumor tissues collected from the mice treated with Dox, DMSN+Dox and TiDMSN+Dox. Scale bar: 50  $\mu\text{m}$

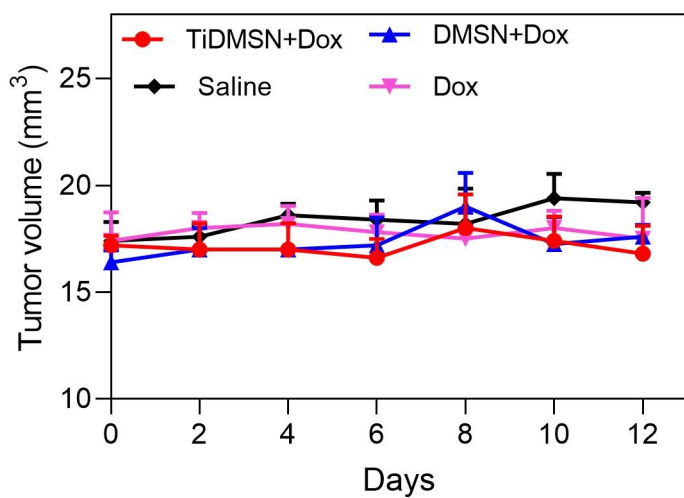

Fig. S24: Body weight measurement of the mice treated with different formulations.

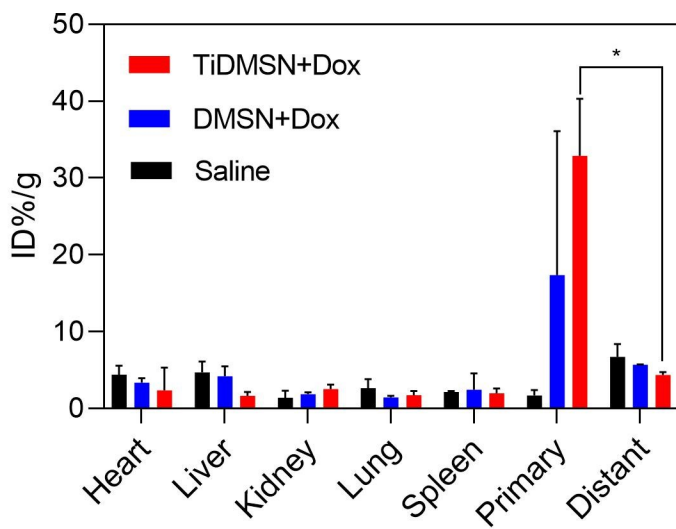

Fig. S25: Biodistribution of Si content from different nanoparticle formulation in heart, liver, kidney, lung, spleen, primary and distant tumor after 4 days of intratumoral injection.

Table S1: Detailed structural properties of nanoparticle formulations. N<sub>2</sub> sorption and ICP analysis of the nanoparticles.

| <b>Sample</b> | <b>D<br/>(nm)</b> | <b>S<sub>BET</sub><br/>(m<sup>2</sup>/g)</b> | <b>V<sub>p</sub><br/>(cm<sup>3</sup>/g)</b> | <b>d<sub>p</sub><br/>(nm)</b> | <b>Ti Content<br/>(μg/mg)</b> |
|---------------|-------------------|----------------------------------------------|---------------------------------------------|-------------------------------|-------------------------------|
| <b>TiDMSN</b> | 280               | 249.7                                        | 1.0                                         | 33.6                          | 10.6                          |
| <b>DMSN</b>   | 280               | 400.2                                        | 1.37                                        | 33.8                          | -                             |

Note: D is the particle size estimated from the TEM images; S<sub>BET</sub> is the BET surface area; V<sub>p</sub> is the total pore volume; and d<sub>p</sub> is the pore size calculated from the adsorption branch using the BJH method.

Table S2: Detailed information of the TA (including p-TA) enriched by different nanoparticle formulations.

| Control                           | TiDMSN                            | DMSN                              |
|-----------------------------------|-----------------------------------|-----------------------------------|
| Galectin-related protein          | Hsp90 co-chaperone Cdc37-like     | Histone H4                        |
| Autophagy-related protein 2       | 1                                 | Hsp90 co-chaperone                |
| homolog A                         | Rho guanine nucleotide            | Ski oncogene                      |
| Histone H1                        | exchange factor 19                | Tumor suppressor candidate        |
| Mucin 16                          | Protein PRRC2A                    | gene 1                            |
| Rho GTPase-activating protein     | SH3 and PX domain-containing      | Heat shock protein 105 kDa        |
| 10                                | protein 2A                        | Breast carcinoma-amplified        |
| Death ligand signal enhancer      | Eukaryotic translation initiation | sequence 1                        |
| Rho guanine nucleotide            | factor 3                          | Death effector domain-            |
| exchange factor 5                 | T-complex protein 1               | containing protein                |
| Apoptosis-stimulating of p53      | DEAD (Asp-Glu-Ala-Asp) box        | Ras and Rab interactor 3          |
| protein                           | polypeptide 23                    | Rab11 family-interacting          |
| Eukaryotic translation initiation | cDNA FLJ52075                     | protein 2                         |
| factor 2B                         | Ras-related protein Rab-26        | Eukaryotic translation initiation |
| Tudor domain-containing           | Elongation of very long chain     | factor 2B                         |
| protein 1                         | fatty acids protein 4             | Autophagy-related protein 2       |
| Death-inducer obliterator 1       | Rho GTPase-activating protein     | homolog B                         |
| Splicing factor                   | 10                                | Carcinoembryonic antigen-         |
| Cell death activator              | Microtubule-associated protein    | related cell adhesion molecule    |
| Histone H2A                       | 2                                 | 13                                |
| High mobility group protein B2    | SH3 domain and                    | SH2 domain-containing protein     |
| eIF4GI protein                    | tetratricopeptide repeats 1       | 4A                                |
| Nischarin                         | Eukaryotic translation initiation | Galectin-3-                       |
| Phosphoinositide phospholipase    | factor 2B                         | Ras association domain-           |
| C                                 | Multidrug resistance protein 1B   | containing protein 10             |
| Teneurin-1                        | Heat shock 70 kDa protein         | RIKEN cDNA C030048B08             |
| Hypoxia up-regulated protein 1    | Rho-related BTB domain-           | Death-inducer obliterator 1       |
| Astrotactin-2                     | containing protein 1              | Microtubule-associated tumor      |
|                                   | Histocompatibility 2, class II    | suppressor candidate 2            |
|                                   | antigen E beta2                   | Rho guanine nucleotide            |
|                                   | Rab GTPase-activating protein 1   | exchange factor 12                |
|                                   | Serologically defined colon       | TNF receptor-associated factor    |
|                                   | cancer antigen 3                  | 6                                 |
|                                   | DnaJ (Hsp40) homolog              | Rab40b, member RAS oncogene       |
|                                   | Annexin                           | family                            |
|                                   | MHC class II H2-M alpha chain     | SR-related CTD-associated         |
|                                   | Fasciculation and elongation      | factor 4                          |
|                                   | protein zeta                      | Splicing factor 3b                |
|                                   | Translation elongation factor     | DnaJ (Hsp40)                      |
|                                   | Soluble interferon-gamma          | Tumor protein D54                 |
|                                   | receptor                          | Mucin 16                          |
|                                   | Ras GTPase-activating-like        | Tudor domain-containing           |
|                                   | protein                           | protein 3                         |
|                                   | Interferon-stimulated 20 kDa      | Tet oncogene 2                    |



|  |                                                                                                                                                                                                                                                                                                                                                                                                                                                                                                                                                                                                                                                                                                                                                                                                                                                                                                                                                                                                                                                                                                                                           |                                                                                                                                              |
|--|-------------------------------------------------------------------------------------------------------------------------------------------------------------------------------------------------------------------------------------------------------------------------------------------------------------------------------------------------------------------------------------------------------------------------------------------------------------------------------------------------------------------------------------------------------------------------------------------------------------------------------------------------------------------------------------------------------------------------------------------------------------------------------------------------------------------------------------------------------------------------------------------------------------------------------------------------------------------------------------------------------------------------------------------------------------------------------------------------------------------------------------------|----------------------------------------------------------------------------------------------------------------------------------------------|
|  | <p>Stat5a protein<br/>Heat shock transcription factor 1 gammaalpha<br/>Histone H1<br/>Rab11 family-interacting protein<br/>Death-inducer obliterator 1<br/>Proto-oncogene tyrosine-protein kinase<br/>Breast carcinoma-amplified sequence 1<br/>Elongation of very long chain fatty acids<br/>SR-related CTD-associated factor 4<br/>Ras-related GTP-binding protein A<br/>Hypoxia up-regulated protein 1<br/>Ras association domain-containing protein 2<br/>SH3 and multiple ankyrin repeat domains protein 2<br/>Rab9 effector protein with kelch motifs<br/>cAMP-responsive element modulator<br/>Tumor protein D54<br/>Rho GTPase activating protein 24<br/>Heat shock protein 105 kDa<br/>Interleukin-1 receptor-associated kinase<br/>Apoptotic chromatin condensation inducer 1<br/>Apoptosis-inducing factor 2<br/>Germinal-center-associated nuclear protein<br/>Maestro heat-like repeat-containing protein family member<br/>SAGA-associated factor 29<br/>DEAD (Asp-Glu-Ala-Asp) box polypeptide 43<br/>Nischarin<br/>CASP8-associated protein 2<br/>Rab40b, member RAS oncogene family<br/>DNA repair and recombination</p> | <p>Homeobox protein<br/>Phosphoinositide phospholipase C<br/>Filensin<br/>Protein NPAT<br/>Astrotactin-2<br/>Nischarin<br/>Semaphorin-6A</p> |
|--|-------------------------------------------------------------------------------------------------------------------------------------------------------------------------------------------------------------------------------------------------------------------------------------------------------------------------------------------------------------------------------------------------------------------------------------------------------------------------------------------------------------------------------------------------------------------------------------------------------------------------------------------------------------------------------------------------------------------------------------------------------------------------------------------------------------------------------------------------------------------------------------------------------------------------------------------------------------------------------------------------------------------------------------------------------------------------------------------------------------------------------------------|----------------------------------------------------------------------------------------------------------------------------------------------|

|  |                                                                                                                                                                                                                                                                                                                                                                                                                                                                                                                                                                                                                                                                                                                                                                                                                                                                                                                                                                                                                                                                                                                                                                               |  |
|--|-------------------------------------------------------------------------------------------------------------------------------------------------------------------------------------------------------------------------------------------------------------------------------------------------------------------------------------------------------------------------------------------------------------------------------------------------------------------------------------------------------------------------------------------------------------------------------------------------------------------------------------------------------------------------------------------------------------------------------------------------------------------------------------------------------------------------------------------------------------------------------------------------------------------------------------------------------------------------------------------------------------------------------------------------------------------------------------------------------------------------------------------------------------------------------|--|
|  | <p> protein RAD54B<br/> HMG box transcription factor<br/> Ras-related protein Rab-7L1<br/> Vasopressin V1a receptor<br/> RAB39, member RAS oncogene family<br/> CPN10-like protein<br/> Autophagy-related protein 2<br/> Breast cancer 2<br/> Killer cell lectin-like receptor subfamily E<br/> Tudor domain-containing protein 3<br/> Metastasis-associated in colon cancer 1<br/> cDNA FLJ34039<br/> Pre-mRNA-splicing factor 38B<br/> Splicing factor 3b<br/> Galectin-3-binding protein<br/> eIF-2-alpha kinase<br/> Leucine-rich glioma-inactivated protein 1<br/> Leukocyte-associated immunoglobulin-like receptor 1<br/> Calcium permeable stress-gated cation channel 1<br/> Cep290 protein<br/> DNA topoisomerase 2-binding protein 1<br/> Transcriptional enhancer factor TEF<br/> Mitogen-activated protein kinase-binding protein 1<br/> NADH dehydrogenase<br/> Gag protein<br/> Anoctamin-7<br/> Phosphoinositide phospholipase C<br/> Ras and Rab interactor 1<br/> Smage-3 protein<br/> Teneurin-1<br/> Matrilin-2<br/> TBC1 domain family member 17<br/> FAS-associated factor 2<br/> Tanc1 protein<br/> Vinculin<br/> Protein NPAT<br/> Semaphorin-6A </p> |  |
|--|-------------------------------------------------------------------------------------------------------------------------------------------------------------------------------------------------------------------------------------------------------------------------------------------------------------------------------------------------------------------------------------------------------------------------------------------------------------------------------------------------------------------------------------------------------------------------------------------------------------------------------------------------------------------------------------------------------------------------------------------------------------------------------------------------------------------------------------------------------------------------------------------------------------------------------------------------------------------------------------------------------------------------------------------------------------------------------------------------------------------------------------------------------------------------------|--|

|  |                                                                   |  |
|--|-------------------------------------------------------------------|--|
|  | Cullin-7<br>Stathmin-4<br>Filensin<br>Exportin-2<br>Astrotactin-2 |  |
|--|-------------------------------------------------------------------|--|

Table S3: Detailed information of the p-TA enriched by different nanoparticle formulations.

| Control                                                                                                                                                   | TiDMSN                                                                                                                                                                                                                                                                                                                                                                                                                                                                                                                                                                                                                                                                                                                                                                                                                                         | DMSN                                                                                                                                                                                                                                                                                                                                                                         |
|-----------------------------------------------------------------------------------------------------------------------------------------------------------|------------------------------------------------------------------------------------------------------------------------------------------------------------------------------------------------------------------------------------------------------------------------------------------------------------------------------------------------------------------------------------------------------------------------------------------------------------------------------------------------------------------------------------------------------------------------------------------------------------------------------------------------------------------------------------------------------------------------------------------------------------------------------------------------------------------------------------------------|------------------------------------------------------------------------------------------------------------------------------------------------------------------------------------------------------------------------------------------------------------------------------------------------------------------------------------------------------------------------------|
| Rho GTPase-activating protein 10<br>Death ligand signal enhancer<br>Eukaryotic translation initiation factor 2B<br>Proto-oncogene tyrosine-protein kinase | Hsp90 co-chaperone Cdc37-like 1<br>RAB39, member RAS oncogene family<br>Rho guanine nucleotide exchange factor 19<br>Protein PRRC2A<br>SH3 and PX domain-containing protein 2A<br>Eukaryotic translation initiation factor 3<br>DEAD (Asp-Glu-Ala-Asp) box polypeptide 23<br>Ras-related protein Rab-26<br>Elongation of very long chain fatty acids protein 4<br>Rho GTPase-activating protein 10<br>SH3 domain and tetratricopeptide repeats 1<br>Eukaryotic translation initiation factor 2B<br>Heat shock 70 kDa protein<br>Rho-related BTB domain-containing protein 1<br>Interferon-stimulated 20 kDa Stat5a protein<br>Heat shock transcription factor 1 gammaalpha<br>Rab11 family-interacting protein<br>Proto-oncogene tyrosine-protein kinase<br>Breast carcinoma-amplified sequence 1<br>Elongation of very long chain fatty acids | Hsp90 co-chaperone<br>Rab11 family-interacting protein 2<br>Eukaryotic translation initiation factor 2B<br>Ras association domain-containing protein 10<br>Heat shock protein 105 kDa<br>Death-inducer obliterator 1<br>Microtubule-associated tumor suppressor candidate 2<br>Splicing factor 3b<br>DnaJ<br>Ras and Rab interactor 3<br>Tumor protein D54<br>Tet oncogene 2 |

|  |                                                                                                                                                                                                                                                                                                                                                                                                                                                                                                                                                                                                                                                                                                                                                                                                                                                                                                                                        |  |
|--|----------------------------------------------------------------------------------------------------------------------------------------------------------------------------------------------------------------------------------------------------------------------------------------------------------------------------------------------------------------------------------------------------------------------------------------------------------------------------------------------------------------------------------------------------------------------------------------------------------------------------------------------------------------------------------------------------------------------------------------------------------------------------------------------------------------------------------------------------------------------------------------------------------------------------------------|--|
|  | Ras-related GTP-binding protein A<br>Rab9 effector protein with kelch motifs<br>Tumor protein D54<br>Heat shock protein 105 kDa<br>Apoptotic chromatin condensation inducer 1<br>Germinal-center-associated nuclear protein<br>SAGA-associated factor 29<br>CASP8-associated protein 2<br>Rab40b, member RAS oncogene family<br>HMG box transcription factor CPN10-like protein<br>Breast cancer 2<br>Killer cell lectin-like receptor subfamily E<br>Metastasis-associated in colon cancer 1<br>Splicing factor 3b<br>Leucine-rich glioma-inactivated protein 1<br>Leukocyte-associated immunoglobulin-like 1<br>Calcium permeable stress- 1<br>DNA topoisomerase 2-binding protein 1<br>Transcriptional enhancer factor TEF<br>Mitogen-activated protein kinase-binding protein 1<br>Anoctamin-7<br>Ras and Rab interactor 1<br>Smage-3 protein<br>Matrilin-2<br>TBC1 domain family member 17<br>FAS-associated factor 2<br>Cullin-7 |  |
|--|----------------------------------------------------------------------------------------------------------------------------------------------------------------------------------------------------------------------------------------------------------------------------------------------------------------------------------------------------------------------------------------------------------------------------------------------------------------------------------------------------------------------------------------------------------------------------------------------------------------------------------------------------------------------------------------------------------------------------------------------------------------------------------------------------------------------------------------------------------------------------------------------------------------------------------------|--|

Table S4: Detailed information of the self-proteins enriched by different nanoparticle formulations.

| Control                                      | TiDMSN                            | DMSN                                            |
|----------------------------------------------|-----------------------------------|-------------------------------------------------|
| Zinc finger protein<br>Heterogeneous nuclear | Alpha-fetoprotein<br>Nxt2 protein | Telomerase-binding protein<br>ELAV-like protein |

|                                                                                                                                                                                                                                                                                                                                                                                                                                                                                                                                                                                                                                                                                                                                                                                                                                                                                                                                                                                                                                                                                                                                     |                                                                                                                                                                                                                                                                                                                                                                                                                                                                                                                                                                                                                                                                                                                                                                                                                                                                                                                                                                                                                                                                                                                                                                                              |                                                                                                                                                                                                                                                                                                                                                                                                                                                                                                                                                                                                                                                                                                                                                                                                                                                                                                                                                                                                                                                                                                                                                                                                   |
|-------------------------------------------------------------------------------------------------------------------------------------------------------------------------------------------------------------------------------------------------------------------------------------------------------------------------------------------------------------------------------------------------------------------------------------------------------------------------------------------------------------------------------------------------------------------------------------------------------------------------------------------------------------------------------------------------------------------------------------------------------------------------------------------------------------------------------------------------------------------------------------------------------------------------------------------------------------------------------------------------------------------------------------------------------------------------------------------------------------------------------------|----------------------------------------------------------------------------------------------------------------------------------------------------------------------------------------------------------------------------------------------------------------------------------------------------------------------------------------------------------------------------------------------------------------------------------------------------------------------------------------------------------------------------------------------------------------------------------------------------------------------------------------------------------------------------------------------------------------------------------------------------------------------------------------------------------------------------------------------------------------------------------------------------------------------------------------------------------------------------------------------------------------------------------------------------------------------------------------------------------------------------------------------------------------------------------------------|---------------------------------------------------------------------------------------------------------------------------------------------------------------------------------------------------------------------------------------------------------------------------------------------------------------------------------------------------------------------------------------------------------------------------------------------------------------------------------------------------------------------------------------------------------------------------------------------------------------------------------------------------------------------------------------------------------------------------------------------------------------------------------------------------------------------------------------------------------------------------------------------------------------------------------------------------------------------------------------------------------------------------------------------------------------------------------------------------------------------------------------------------------------------------------------------------|
| <p>ribonucleoprotein<br/>E3 ubiquitin-protein<br/>Brefeldin A-inhibited guanine nucleotide-exchange protein 3<br/>Synaptotagmin-like protein 4<br/>Myosin<br/>Double homeobox family member 3<br/>Histone lysine demethylase HEAT repeat-containing 1<br/>Serine-protein kinase ATM<br/>Phosphatidylinositol-glycan biosynthesis class W protein<br/>Homeobox protein<br/>Solute carrier family 28 member 3<br/>Leucine-rich repeat-containing protein 43<br/>Phosphoinositide 3-kinase regulatory subunit 4<br/>Microtubule-associated serine/threonine-protein kinase 4<br/>Neprilysin<br/>Polyadenylate-binding protein-interacting protein 1<br/>Adenosine deaminase-like protein<br/>Exocyst complex component 3-like protein 4<br/>Armadillo repeat-containing protein 8<br/>PR domain-containing protein 11<br/>Protein PRRC1<br/>Sperm-associated antigen 1<br/>Fibroblast growth factor receptor-like 1<br/>Podocan<br/>Small G protein signaling modulator 1<br/>Bardet-Biedl syndrome 5 protein<br/>PDZ domain-containing 2<br/>Catenin beta-1<br/>Dynein heavy chain domain 1<br/>F-box and WD-40 domain protein 27</p> | <p>Heterogeneous nuclear ribonucleoprotein<br/>Myosin<br/>Early endosome antigen<br/>MORC family CW-type zinc finger protein<br/>Zinc finger protein<br/>Nipped-B-like protein<br/>NEDD4-binding protein<br/>Basal body-orientation factor<br/>Tetratricopeptide repeat protein<br/>Actin-related protein<br/>Fer-1-like protein<br/>AT-rich interactive domain-containing protein<br/>Sperm flagellar protein<br/>ADP-ribosylation factor GTPase-activating protein<br/>ELAV-like protein<br/>Stonin<br/>Crystallin beta-gamma domain-containing<br/>Retinal degeneration 3-like<br/>Synaptotagmin-like protein<br/>Coiled-coil domain-containing protein<br/>Kinesin-like protein<br/>BAH and coiled-coil domain-containing protein<br/>Capsid protein<br/>Sodium/myo-inositol cotransporter<br/>Cytoskeleton-associated protein<br/>Protein HIRA<br/>Golgi apparatus protein<br/>Mitochondrial assembly of ribosomal large subunit protein<br/>Semaphorin<br/>Urocortin<br/>Coiled-coil and C2 domain-containing protein<br/>Protein furry homolog<br/>ATP-binding cassette protein<br/>Phosphorylated adapter RNA export protein<br/>Lmb145-cap1-243 protein<br/>Pre-B-cell leukemia</p> | <p>Pleckstrin homology domain-containing family A member 7<br/>Collagen alpha-1(VII) chain<br/>Envelope surface protein SU subunit<br/>Protein unc-13 homolog<br/>IgM heavy chain variable region<br/>MAPK/MAK/MRK overlapping kinase<br/>Vesicle-trafficking protein SEC22c<br/>3-phosphoinositide-dependent protein kinase 1<br/>BAH and coiled-coil domain-containing protein<br/>Nuclear valosin-containing protein-like<br/>BCL-6 corepressor<br/>Cyclin-L2<br/>Proline-rich AKT1 substrate 1<br/>Protein phosphatase 1, regulatory subunit 9A<br/>CREB-regulated transcription coactivator 3<br/>Zinc finger and BTB domain containing<br/>Zinc finger protein<br/>Tetraspanin-14<br/>Coiled-coil domain-containing protein<br/>Netrin-G2<br/>Cullin-4A<br/>ADP-ribosylation factor GTPase-activating protein<br/>Tle2 protein<br/>Nephrocystin-3<br/>Interferon-gamma-inducible GTPase Ifgga3 protein<br/>Insulin-induced gene 2 protein<br/>Arf-GAP with GTPase, ANK repeat and PH domain-containing protein<br/>Calpain-9<br/>ASL1/AK132805 fusion protein<br/>Nipped-B-like protein<br/>Phosphatidylinositol-glycan biosynthesis class W protein<br/>Microtubule-associated protein</p> |
|-------------------------------------------------------------------------------------------------------------------------------------------------------------------------------------------------------------------------------------------------------------------------------------------------------------------------------------------------------------------------------------------------------------------------------------------------------------------------------------------------------------------------------------------------------------------------------------------------------------------------------------------------------------------------------------------------------------------------------------------------------------------------------------------------------------------------------------------------------------------------------------------------------------------------------------------------------------------------------------------------------------------------------------------------------------------------------------------------------------------------------------|----------------------------------------------------------------------------------------------------------------------------------------------------------------------------------------------------------------------------------------------------------------------------------------------------------------------------------------------------------------------------------------------------------------------------------------------------------------------------------------------------------------------------------------------------------------------------------------------------------------------------------------------------------------------------------------------------------------------------------------------------------------------------------------------------------------------------------------------------------------------------------------------------------------------------------------------------------------------------------------------------------------------------------------------------------------------------------------------------------------------------------------------------------------------------------------------|---------------------------------------------------------------------------------------------------------------------------------------------------------------------------------------------------------------------------------------------------------------------------------------------------------------------------------------------------------------------------------------------------------------------------------------------------------------------------------------------------------------------------------------------------------------------------------------------------------------------------------------------------------------------------------------------------------------------------------------------------------------------------------------------------------------------------------------------------------------------------------------------------------------------------------------------------------------------------------------------------------------------------------------------------------------------------------------------------------------------------------------------------------------------------------------------------|

|                                                                                                                                                                                                                                                                                                                                                                                                                                                                                                                                                                                                                                                                                                                                                                                                                                                                                                                                                                                                                                                                                                                                                       |                                                                                                                                                                                                                                                                                                                                                                                                                                                                                                                                                                                                                                                                                                                                                                                                                                                                                                                                                                                                                                                                                                                                                                                                                               |                                                                                                                                                                                                                                                                                                                                                                                                                                                                                                                                                                                                                                                                                                                                                                                                                                                                                                                                                                                                                                                                                                                                                                                                                             |
|-------------------------------------------------------------------------------------------------------------------------------------------------------------------------------------------------------------------------------------------------------------------------------------------------------------------------------------------------------------------------------------------------------------------------------------------------------------------------------------------------------------------------------------------------------------------------------------------------------------------------------------------------------------------------------------------------------------------------------------------------------------------------------------------------------------------------------------------------------------------------------------------------------------------------------------------------------------------------------------------------------------------------------------------------------------------------------------------------------------------------------------------------------|-------------------------------------------------------------------------------------------------------------------------------------------------------------------------------------------------------------------------------------------------------------------------------------------------------------------------------------------------------------------------------------------------------------------------------------------------------------------------------------------------------------------------------------------------------------------------------------------------------------------------------------------------------------------------------------------------------------------------------------------------------------------------------------------------------------------------------------------------------------------------------------------------------------------------------------------------------------------------------------------------------------------------------------------------------------------------------------------------------------------------------------------------------------------------------------------------------------------------------|-----------------------------------------------------------------------------------------------------------------------------------------------------------------------------------------------------------------------------------------------------------------------------------------------------------------------------------------------------------------------------------------------------------------------------------------------------------------------------------------------------------------------------------------------------------------------------------------------------------------------------------------------------------------------------------------------------------------------------------------------------------------------------------------------------------------------------------------------------------------------------------------------------------------------------------------------------------------------------------------------------------------------------------------------------------------------------------------------------------------------------------------------------------------------------------------------------------------------------|
| <p>Low-density lipoprotein receptor-related protein 11</p> <p>Tight junction protein</p> <p>StAR-related lipid transfer protein 9</p> <p>Junctophilin-1</p> <p>GTP-binding protein REM 2</p> <p>Alpha-mannosidase</p> <p>Centrosomal protein</p> <p>Replicase polyprotein</p> <p>KIBRA</p> <p>Spnb3 protein</p> <p>Pltp protein</p> <p>Synaptonemal complex protein 2</p> <p>Myh7 protein</p> <p>MyoD family inhibitor domain-containing protein</p> <p>Bromodomain-containing protein</p> <p>Cardiac-enriched FHL2-interacting protein</p> <p>Twinfilin-2</p> <p>Ectoderm-neural cortex protein 1</p> <p>Pard3 protein</p> <p>FRAS1-related extracellular matrix protein 1</p> <p>Anillin</p> <p>Four and a half LIM domains protein 5</p> <p>TATA box-binding protein-like protein 1</p> <p>Epiplakin</p> <p>Cartilage acidic protein 1</p> <p>Cilia- and flagella-associated protein</p> <p>Coiled-coil domain-containing protein</p> <p>Kinetochore-associated protein 1</p> <p>Alpha-2-HS-glycoprotein</p> <p>MAM domain-containing glycosylphosphatidylinositol anchor protein 1</p> <p>Cytoplasmic phosphatidylinositol transfer protein 1</p> | <p>transcription factor</p> <p>Anillin</p> <p>Nostrin</p> <p>Septin</p> <p>DNA topoisomerase 2-binding protein</p> <p>WD repeat and FYVE domain-containing protein</p> <p>Dihydropyrimidinase-related protein</p> <p>NCK-interacting protein with SH3 domain</p> <p>Zinc transporter</p> <p>Uveal autoantigen with coiled-coil domains and ankyrin repeats</p> <p>28S ribosomal protein</p> <p>Pleckstrin homology domain-containing family A member 7</p> <p>Complement component</p> <p>RNA-binding protein</p> <p>Forkhead box</p> <p>G-protein coupled receptor</p> <p>Nuclear receptor coactivator</p> <p>Sacs protein</p> <p>Alpha-actinin-4</p> <p>Chromodomain helicase DNA-binding protein</p> <p>Vacuolar protein</p> <p>Prickle planar cell polarity protein</p> <p>Cat eye syndrome critical region protein</p> <p>Protein ABHD8</p> <p>G patch domain and ankyrin repeat-containing protein</p> <p>Obscurin</p> <p>Clathrin heavy chain</p> <p>Laminin subunit alpha-1</p> <p>Armadillo repeat-containing</p> <p>Protocadherin</p> <p>Hyaluronan and proteoglycan link protein</p> <p>Centrosomal protein</p> <p>Serine/arginine repetitive matrix protein</p> <p>ATP-binding cassette sub-family A member 5</p> | <p>Cpn2 protein</p> <p>Microsomal triglyceride transfer protein</p> <p>Muscleblind-like protein</p> <p>NHL repeat containing 2</p> <p>Vasorin</p> <p>Plectin</p> <p>Hephaestin-like protein</p> <p>NACHT, LRR and PYD domains-containing protein</p> <p>Myosin</p> <p>Heterogeneous nuclear ribonucleoprotein</p> <p>Copine-1</p> <p>Paternally-expressed gene 3 protein</p> <p>Transforming growth factor beta-1-induced transcript 1 protein</p> <p>Myelin P2 protein</p> <p>Serine/arginine repetitive matrix protein</p> <p>Cation channel sperm-associated protein</p> <p>WD repeat and coiled-coil-containing protein</p> <p>Kin of IRRE-like protein</p> <p>AP2-interacting clathrin-endocytosis protein</p> <p>Calcium-binding and coiled-coil domain-containing protein</p> <p>Kinesin-like protein</p> <p>Vacuolar protein sorting-associated protein</p> <p>TROVE domain family, member 2</p> <p>WW domain-containing adapter protein with coiled-coil</p> <p>Protein unc-13 homolog D</p> <p>Baz2b protein</p> <p>Supervillin</p> <p>AAM-B protein</p> <p>ELAV-like protein</p> <p>Apolipoprotein L</p> <p>CUGBP Elav-like family member 2</p> <p>Centrosome-associated protein</p> <p>Protein broad-minded</p> |
|-------------------------------------------------------------------------------------------------------------------------------------------------------------------------------------------------------------------------------------------------------------------------------------------------------------------------------------------------------------------------------------------------------------------------------------------------------------------------------------------------------------------------------------------------------------------------------------------------------------------------------------------------------------------------------------------------------------------------------------------------------------------------------------------------------------------------------------------------------------------------------------------------------------------------------------------------------------------------------------------------------------------------------------------------------------------------------------------------------------------------------------------------------|-------------------------------------------------------------------------------------------------------------------------------------------------------------------------------------------------------------------------------------------------------------------------------------------------------------------------------------------------------------------------------------------------------------------------------------------------------------------------------------------------------------------------------------------------------------------------------------------------------------------------------------------------------------------------------------------------------------------------------------------------------------------------------------------------------------------------------------------------------------------------------------------------------------------------------------------------------------------------------------------------------------------------------------------------------------------------------------------------------------------------------------------------------------------------------------------------------------------------------|-----------------------------------------------------------------------------------------------------------------------------------------------------------------------------------------------------------------------------------------------------------------------------------------------------------------------------------------------------------------------------------------------------------------------------------------------------------------------------------------------------------------------------------------------------------------------------------------------------------------------------------------------------------------------------------------------------------------------------------------------------------------------------------------------------------------------------------------------------------------------------------------------------------------------------------------------------------------------------------------------------------------------------------------------------------------------------------------------------------------------------------------------------------------------------------------------------------------------------|

|                                                                                                                                                                                                                                                                                                                                                                                                                                                                                                                                                                                                                                                                                                                                                                                                                                                                                                                                                                                                                                                                                                                          |                                                                                                                                                                                                                                                                                                                                                                                                                                                                                                                                                                                                                                                                                                                                                                                                                                                                                                                                                                                                                                                                                                                                                  |                                                                                                                                                                                                                                                                                                                                                                                                                                                                                                                                                                                                                                                                                                                                                                                                                                                                                                                                                                                                                                                                                                                                                                                         |
|--------------------------------------------------------------------------------------------------------------------------------------------------------------------------------------------------------------------------------------------------------------------------------------------------------------------------------------------------------------------------------------------------------------------------------------------------------------------------------------------------------------------------------------------------------------------------------------------------------------------------------------------------------------------------------------------------------------------------------------------------------------------------------------------------------------------------------------------------------------------------------------------------------------------------------------------------------------------------------------------------------------------------------------------------------------------------------------------------------------------------|--------------------------------------------------------------------------------------------------------------------------------------------------------------------------------------------------------------------------------------------------------------------------------------------------------------------------------------------------------------------------------------------------------------------------------------------------------------------------------------------------------------------------------------------------------------------------------------------------------------------------------------------------------------------------------------------------------------------------------------------------------------------------------------------------------------------------------------------------------------------------------------------------------------------------------------------------------------------------------------------------------------------------------------------------------------------------------------------------------------------------------------------------|-----------------------------------------------------------------------------------------------------------------------------------------------------------------------------------------------------------------------------------------------------------------------------------------------------------------------------------------------------------------------------------------------------------------------------------------------------------------------------------------------------------------------------------------------------------------------------------------------------------------------------------------------------------------------------------------------------------------------------------------------------------------------------------------------------------------------------------------------------------------------------------------------------------------------------------------------------------------------------------------------------------------------------------------------------------------------------------------------------------------------------------------------------------------------------------------|
| <p>Glutamate-rich protein 6<br/> Dedicator of cytokinesis protein 6<br/> Trichohyalin-like protein 1<br/> Syt13 protein<br/> BCL-6 corepressor-like protein 1<br/> Mitoguardin 1<br/> Cuedc1 protein<br/> Vesicular integral-membrane protein<br/> Retinoic acid receptor responder protein 2<br/> CLIP-associating protein 1<br/> HEPACAM family member 2<br/> Ciliary rootlet coiled-coil, rootletin family member 2<br/> Kinetochore protein<br/> Echinoderm microtubule-associated protein-like 6<br/> Stonin-1<br/> Cullin-4B<br/> SHC SH2 domain-binding protein 1<br/> Tektin 1<br/> Tetraspanin<br/> Multidrug and toxin extrusion protein 1<br/> Collagen alpha-1(XXVII) chain<br/> Sarm1 protein<br/> Smoothelin<br/> Vacuolar protein sorting-associated protein VTA1 homolog<br/> Vertnin<br/> Angiopoietin-related protein 7<br/> Nucleoprotein<br/> Protocadherin Fat 2<br/> Vertnin<br/> Arhgap4 protein<br/> Plexin-A4<br/> Caskin1 protein<br/> RNA-binding motif protein 6<br/> Nucleoredoxin-like protein 1<br/> Titin<br/> Nlrp4e protein<br/> Ankyrin-3<br/> Period circadian protein homolog 1</p> | <p>Protein Spindly<br/> DNA repair protein<br/> Sp100 protein<br/> Titin<br/> Sterile alpha motif domain-containing protein<br/> Ecotropic viral integration site 5 protein<br/> Protein BRICK1<br/> Protein YIPF<br/> Kelch-like protein<br/> BTB/POZ domain-containing protein<br/> Tight junction protein<br/> Deoxynucleotidyltransferase terminal-interacting protein<br/> Ataxin-7-like protein<br/> Keratin<br/> Sorting nexin<br/> Dixin<br/> Low affinity immunoglobulin epsilon Fc receptor<br/> Spermatogenesis-associated protein<br/> Bptf protein<br/> DNA excision repair protein<br/> 39S ribosomal protein<br/> Epiplakin<br/> Tripartite motif-containing protein<br/> CLIP-associating protein<br/> Ccdc19 protein<br/> MKIAA0137 protein<br/> Formin-binding protein<br/> Protein FAM135A<br/> Myomesin<br/> Oxysterol-binding protein<br/> Seipin<br/> Protein Wnt-4<br/> Cystic fibrosis transmembrane conductance regulator<br/> Hyaluronan mediated motility receptor<br/> Exocyst complex component<br/> Cytochrome b-c1 complex subunit<br/> T cell receptor beta, constant 2<br/> Ubiquitin-40S ribosomal protein</p> | <p>Major sperm fibrous sheath protein<br/> Tensin-4<br/> IQ motif and SEC7 domain-containing protein<br/> Leucine-rich repeat and guanylate kinase domain-containing protein<br/> Ribosomal protein L3-like<br/> Ankyrin repeat and EF-hand domain-containing protein 1<br/> Guanine nucleotide-binding protein<br/> Protein Wnt-4<br/> Kinesin-like protein<br/> Leucine-rich glioma-inactivated protein<br/> Semaphorin-4D<br/> X-linked retinitis pigmentosa GTPase regulator<br/> Kinesin-like protein KIF26A<br/> PH and SEC7 domain-containing protein<br/> Rnasen protein<br/> Protein transport protein<br/> Gamma-aminobutyric acid receptor subunit rho-1<br/> Tjp1 protein<br/> COMM domain-containing protein<br/> Acrosomal protein KIAA1210<br/> Centrosomal protein<br/> GRB2-related adaptor protein 2<br/> Sclerostin domain-containing protein 1<br/> Echinoderm microtubule-associated protein-like<br/> Uroplakin-1b<br/> Armadillo repeat-containing protein<br/> Pol protein<br/> Midasin<br/> Transmembrane and coiled-coil domain-containing protein<br/> Gria3 protein<br/> Cell division cycle protein<br/> Interleukin 1 receptor accessory protein-like</p> |
|--------------------------------------------------------------------------------------------------------------------------------------------------------------------------------------------------------------------------------------------------------------------------------------------------------------------------------------------------------------------------------------------------------------------------------------------------------------------------------------------------------------------------------------------------------------------------------------------------------------------------------------------------------------------------------------------------------------------------------------------------------------------------------------------------------------------------------------------------------------------------------------------------------------------------------------------------------------------------------------------------------------------------------------------------------------------------------------------------------------------------|--------------------------------------------------------------------------------------------------------------------------------------------------------------------------------------------------------------------------------------------------------------------------------------------------------------------------------------------------------------------------------------------------------------------------------------------------------------------------------------------------------------------------------------------------------------------------------------------------------------------------------------------------------------------------------------------------------------------------------------------------------------------------------------------------------------------------------------------------------------------------------------------------------------------------------------------------------------------------------------------------------------------------------------------------------------------------------------------------------------------------------------------------|-----------------------------------------------------------------------------------------------------------------------------------------------------------------------------------------------------------------------------------------------------------------------------------------------------------------------------------------------------------------------------------------------------------------------------------------------------------------------------------------------------------------------------------------------------------------------------------------------------------------------------------------------------------------------------------------------------------------------------------------------------------------------------------------------------------------------------------------------------------------------------------------------------------------------------------------------------------------------------------------------------------------------------------------------------------------------------------------------------------------------------------------------------------------------------------------|

|                                                                                                                                                                                                                                                                                                                                                                                                                                                                                                                                                                                                                                                                                                                                                                                                                                                                                                                                                                                                                                                                                                                                         |                                                                                                                                                                                                                                                                                                                                                                                                                                                                                                                                                                                                                                                                                                                                                                                                                                                                                                                                                                                                                                                                                                                                                                                    |                                                                                                                                                                                                                                                                                                                                                                                                                                                                                                                                                                                                                                                                                                                                                                                                                                                                                                                                                                                                                                                                                                                                                                                       |
|-----------------------------------------------------------------------------------------------------------------------------------------------------------------------------------------------------------------------------------------------------------------------------------------------------------------------------------------------------------------------------------------------------------------------------------------------------------------------------------------------------------------------------------------------------------------------------------------------------------------------------------------------------------------------------------------------------------------------------------------------------------------------------------------------------------------------------------------------------------------------------------------------------------------------------------------------------------------------------------------------------------------------------------------------------------------------------------------------------------------------------------------|------------------------------------------------------------------------------------------------------------------------------------------------------------------------------------------------------------------------------------------------------------------------------------------------------------------------------------------------------------------------------------------------------------------------------------------------------------------------------------------------------------------------------------------------------------------------------------------------------------------------------------------------------------------------------------------------------------------------------------------------------------------------------------------------------------------------------------------------------------------------------------------------------------------------------------------------------------------------------------------------------------------------------------------------------------------------------------------------------------------------------------------------------------------------------------|---------------------------------------------------------------------------------------------------------------------------------------------------------------------------------------------------------------------------------------------------------------------------------------------------------------------------------------------------------------------------------------------------------------------------------------------------------------------------------------------------------------------------------------------------------------------------------------------------------------------------------------------------------------------------------------------------------------------------------------------------------------------------------------------------------------------------------------------------------------------------------------------------------------------------------------------------------------------------------------------------------------------------------------------------------------------------------------------------------------------------------------------------------------------------------------|
| <p>Desmoglein-2<br/>Nucleolar GTP-binding protein 2<br/>Desmoglein-2<br/>Alpha-2-antiplasmin<br/>Angiopoietin-related protein 7<br/>Agrin<br/>Zinc finger ZZ-type and EF-hand domain-containing protein 1<br/>Fibroblast growth factor 12<br/>Nucleolar protein 12<br/>rRNA-processing protein<br/>GRB2-associated-binding protein 3<br/>CLIP-associating protein 1<br/>Tribbles homolog 2<br/>Septin-9<br/>Myo1d protein<br/>Thyroglobulin<br/>Vitamin D-binding protein<br/>Smad nuclear-interacting protein 1<br/>Spatacsin<br/>JmjC domain-containing protein 5<br/>Nipped-B-like protein<br/>Ankycorbin<br/>AP2-interacting clathrin-endocytosis protein<br/>Ccdc34 protein<br/>Nucleoredoxin-like protein 1<br/>Nuclear pore complex protein<br/>Ninjurin 1<br/>Cryptochrome-2<br/>TATA box-binding protein<br/>WD repeat-containing protein 37<br/>Caspase recruitment domain-containing protein 14<br/>Protocadherin<br/>Upf2 protein<br/>Calpain-9<br/>Secernin-1<br/>MAX gene-associated protein<br/>Plakophilin-4<br/>Transcription factor SOX-14<br/>Leucine-rich repeat and guanylate kinase domain-containing protein</p> | <p>GRB2-related adaptor protein<br/>Protein polybromo-1<br/>F-actin-uncapping protein<br/>Protein DENND6A<br/>Max-interacting protein<br/>A kinase (PRKA) anchor protein<br/>PMS1 homolog 1<br/>Zinc finger BED domain-containing protein<br/>Neuronal apoptosis inhibitory protein<br/>ELKS/Rab6-interacting/CAST family member 1<br/>Netrin<br/>StAR-related lipid transfer protein<br/>MKIAA1261 protein<br/>Centriolar coiled-coil protein<br/>Disabled homolog 2-interacting protein<br/>Tsnaxip1 protein<br/>Protein C9orf135<br/>Acidic fibroblast growth factor intracellular-binding protein<br/>Protein Niban<br/>Gasdermin<br/>Peptidylprolyl isomerase domain and WD repeat-containing protein<br/>Vang-like protein<br/>Amphoterin-induced protein<br/>Ankyrin<br/>Nuclear fragile X mental retardation-interacting protein<br/>Exportin<br/>TOG array regulator of axonemal microtubules protein<br/>Filensin<br/>Hephaestin-like protein<br/>Dickkopf-related protein<br/>Peroxidasin homolog<br/>AI848100 protein<br/>Ube1l<br/>Protein max<br/>ASL1/Sycp1 fusion protein<br/>Apolipoprotein<br/>Taste receptor cell protein<br/>Cilia and flagella-associated</p> | <p>T-complex protein<br/>G1/S-specific cyclin-E1<br/>GAS2-like protein<br/>Ifit2 protein<br/>Abi3bp protein<br/>RNA-binding Raly-like protein<br/>RNA-binding protein<br/>Rho-related BTB domain-containing protein<br/>Ankyrin repeat, SAM and basic leucine zipper domain-containing protein<br/>Serine/threonine-protein kinase<br/>Capping protein, Arp2/3 and myosin-I linker protein<br/>Golgin subfamily A member 4<br/>Ankycorbin<br/>Stonin-1<br/>Eml5 protein<br/>Stonin-2<br/>Golgin subfamily A member 2<br/>Cytochrome P450 26B1<br/>Attractin-like protein<br/>Mefv protein<br/>Nuclear nucleic acid-binding protein<br/>Alstrom syndrome protein<br/>BTB/POZ domain-containing protein<br/>Regulation of nuclear pre-mRNA domain-containing protein<br/>Cation channel sperm-associated protein<br/>Leucine-rich repeat and calponin homology domain-containing protein<br/>EPM2A-interacting protein<br/>Golgi reassembly-stacking protein<br/>Girdin<br/>SERTA domain-containing protein<br/>Pregnancy-specific glycoprotein<br/>IQ domain-containing protein<br/>Protein Lines homolog 1<br/>Centrosome and spindle pole associated protein<br/>Serotransferrin</p> |
|-----------------------------------------------------------------------------------------------------------------------------------------------------------------------------------------------------------------------------------------------------------------------------------------------------------------------------------------------------------------------------------------------------------------------------------------------------------------------------------------------------------------------------------------------------------------------------------------------------------------------------------------------------------------------------------------------------------------------------------------------------------------------------------------------------------------------------------------------------------------------------------------------------------------------------------------------------------------------------------------------------------------------------------------------------------------------------------------------------------------------------------------|------------------------------------------------------------------------------------------------------------------------------------------------------------------------------------------------------------------------------------------------------------------------------------------------------------------------------------------------------------------------------------------------------------------------------------------------------------------------------------------------------------------------------------------------------------------------------------------------------------------------------------------------------------------------------------------------------------------------------------------------------------------------------------------------------------------------------------------------------------------------------------------------------------------------------------------------------------------------------------------------------------------------------------------------------------------------------------------------------------------------------------------------------------------------------------|---------------------------------------------------------------------------------------------------------------------------------------------------------------------------------------------------------------------------------------------------------------------------------------------------------------------------------------------------------------------------------------------------------------------------------------------------------------------------------------------------------------------------------------------------------------------------------------------------------------------------------------------------------------------------------------------------------------------------------------------------------------------------------------------------------------------------------------------------------------------------------------------------------------------------------------------------------------------------------------------------------------------------------------------------------------------------------------------------------------------------------------------------------------------------------------|



|                                                                                                                                                                                                                                                                                                                                                                                                                                                                                                                                                                                                                                                                                                                                                                                                                                                                                                                                                                                                                                                                                                                                                                                                                           |                                                                                                                                                                                                                                                                                                                                                                                                                                                                                                                                                                                                                                                                                                                                                                                                                                                                                                                                                                                                                                                                                                                                                                                                                   |                                                                                                                                                                                                                                                                                                                                                                                                                                                                                                                                                                                                                                                                                                                                                                                                                                                                                                                                                                                                                                                                                                                                                                   |
|---------------------------------------------------------------------------------------------------------------------------------------------------------------------------------------------------------------------------------------------------------------------------------------------------------------------------------------------------------------------------------------------------------------------------------------------------------------------------------------------------------------------------------------------------------------------------------------------------------------------------------------------------------------------------------------------------------------------------------------------------------------------------------------------------------------------------------------------------------------------------------------------------------------------------------------------------------------------------------------------------------------------------------------------------------------------------------------------------------------------------------------------------------------------------------------------------------------------------|-------------------------------------------------------------------------------------------------------------------------------------------------------------------------------------------------------------------------------------------------------------------------------------------------------------------------------------------------------------------------------------------------------------------------------------------------------------------------------------------------------------------------------------------------------------------------------------------------------------------------------------------------------------------------------------------------------------------------------------------------------------------------------------------------------------------------------------------------------------------------------------------------------------------------------------------------------------------------------------------------------------------------------------------------------------------------------------------------------------------------------------------------------------------------------------------------------------------|-------------------------------------------------------------------------------------------------------------------------------------------------------------------------------------------------------------------------------------------------------------------------------------------------------------------------------------------------------------------------------------------------------------------------------------------------------------------------------------------------------------------------------------------------------------------------------------------------------------------------------------------------------------------------------------------------------------------------------------------------------------------------------------------------------------------------------------------------------------------------------------------------------------------------------------------------------------------------------------------------------------------------------------------------------------------------------------------------------------------------------------------------------------------|
| <p>Invasion inhibitory protein 45<br/> Lethal(2) giant larvae protein homolog 2<br/> Activating molecule in BECN1-regulated autophagy protein 1<br/> Very low-density lipoprotein receptor<br/> Vomer nasal type-1 receptor<br/> NAD-dependent protein lipoamidase sirtuin-4, mitochondrial<br/> Pleckstrin homology domain-containing family A member 7<br/> RCC1 and BTB domain-containing protein 2<br/> Ankyrin repeat and KH domain-containing 1<br/> Amiloride-sensitive sodium channel subunit alpha<br/> Protein unc-80 homolog<br/> Laminin subunit alpha-5<br/> Something about silencing protein 10<br/> Sterol 26-hydroxylase, mitochondrial<br/> Polycomb group RING finger protein 1<br/> Transcription factor TFIIB component B'' homolog<br/> Chromatin assembly factor 1 subunit A<br/> Disintegrin and metalloproteinase domain-containing protein<br/> Kelch-like protein 41<br/> Serine protease 57<br/> Survival motor neuron protein isoform h<br/> Omega-amidase NIT2<br/> Twinkle protein, mitochondrial<br/> Nucleolar and coiled-body phosphoprotein 1<br/> Mucolipin-1<br/> Coxsackievirus and adenovirus receptor homolog<br/> Nuclear fragile X mental retardation-interacting protein 2</p> | <p>protein<br/> Ubiquitin conjugation factor<br/> Docking protein<br/> Protein lin-9<br/> Mybbp1a protein<br/> Myo5c protein<br/> Replicase polyprotein<br/> 60S ribosomal protein<br/> Myosin-binding protein<br/> Leucine-rich repeat and immunoglobulin-like domain-containing nogo receptor-interacting protein<br/> Alstrom syndrome protein<br/> Cilia- and flagella-associated protein<br/> MKIAA0109 protein<br/> Alpha-crystallin B chain<br/> CUB and Sushi multiple domains<br/> DNA-binding protein<br/> Vertnin<br/> Ankyrin repeat and zinc finger domain-containing protein<br/> Pyruvate dehydrogenase protein<br/> Major urinary protein<br/> Echinoderm microtubule-associated protein-like<br/> Protein SOGA3<br/> TBP-associated factor<br/> SH2 domain-containing protein<br/> Centromere protein<br/> CDK5 regulatory subunit-associated protein<br/> Protein APCDD1<br/> CD72 variant<br/> Pcdha2 protein<br/> Kinectin<br/> Protein unc-45<br/> WD repeat and HMG-box DNA-binding protein<br/> Calponin<br/> Cuedc1 protein<br/> Major facilitator superfamily domain-containing<br/> POC1 centriolar protein<br/> WD repeat-containing protein<br/> SIRP beta 1 cell surface protein</p> | <p>Polymeric immunoglobulin receptor<br/> Tripartite motif-containing protein<br/> Zinc finger CCHC domain-containing protein<br/> Protein Hook homolog 3<br/> Testis-expressed protein pre-mRNA 3' end-processing protein<br/> Dynein, axonemal, heavy chain 11<br/> Sprouty homolog 1<br/> FRAS1-related extracellular matrix protein<br/> Sterol regulatory element-binding protein<br/> Tanc1 protein<br/> Zinc finger and SCAN domain-containing protein<br/> Leucine-rich repeat-containing protein<br/> Transformation/transcription domain-associated protein<br/> Dynein heavy chain 3, axonemal<br/> Hydrocephalus-inducing protein<br/> Epidermal growth factor-like protein<br/> Syntaxin-binding protein<br/> Tetratricopeptide repeat protein<br/> WD repeat-containing protein<br/> AMMECR1-like protein<br/> T-complex protein 1 subunit delta<br/> Ccdc19 protein<br/> Transmembrane protein<br/> C2 domain-containing protein<br/> Nucleolar protein<br/> Aquaporin-7<br/> Copine-3<br/> EF-hand calcium-binding domain-containing protein<br/> Eml1 protein<br/> Hoxb1 protein<br/> Protein SON<br/> Nesprin-2<br/> CCR4-NOT transcription</p> |
|---------------------------------------------------------------------------------------------------------------------------------------------------------------------------------------------------------------------------------------------------------------------------------------------------------------------------------------------------------------------------------------------------------------------------------------------------------------------------------------------------------------------------------------------------------------------------------------------------------------------------------------------------------------------------------------------------------------------------------------------------------------------------------------------------------------------------------------------------------------------------------------------------------------------------------------------------------------------------------------------------------------------------------------------------------------------------------------------------------------------------------------------------------------------------------------------------------------------------|-------------------------------------------------------------------------------------------------------------------------------------------------------------------------------------------------------------------------------------------------------------------------------------------------------------------------------------------------------------------------------------------------------------------------------------------------------------------------------------------------------------------------------------------------------------------------------------------------------------------------------------------------------------------------------------------------------------------------------------------------------------------------------------------------------------------------------------------------------------------------------------------------------------------------------------------------------------------------------------------------------------------------------------------------------------------------------------------------------------------------------------------------------------------------------------------------------------------|-------------------------------------------------------------------------------------------------------------------------------------------------------------------------------------------------------------------------------------------------------------------------------------------------------------------------------------------------------------------------------------------------------------------------------------------------------------------------------------------------------------------------------------------------------------------------------------------------------------------------------------------------------------------------------------------------------------------------------------------------------------------------------------------------------------------------------------------------------------------------------------------------------------------------------------------------------------------------------------------------------------------------------------------------------------------------------------------------------------------------------------------------------------------|

|                                                                       |                                                                    |                                                                     |
|-----------------------------------------------------------------------|--------------------------------------------------------------------|---------------------------------------------------------------------|
| Isoform VEGF-B167 of Vascular endothelial growth factor B             | Nesprin                                                            | complex subunit 1                                                   |
| Calcineurin B homologous protein 2                                    | MKIAA1858 protein                                                  | Sp140 nuclear body protein                                          |
| Exosome complex component MTR3                                        | Chromodomain-helicase-DNA-binding protein                          | Cilia- and flagella-associated protein                              |
| AT-rich interactive domain-containing protein 5A                      | Calcium-binding and coiled-coil domain-containing protein          | MARVEL domain-containing protein                                    |
| Actinin alpha 2                                                       | Trichohyalin-like protein                                          | Heterogeneous nuclear ribonucleoprotein D-like                      |
| Ubiquitin conjugation factor E4 B                                     | Cohesin subunit SA-1                                               | Protein Tex24                                                       |
| Obscurin                                                              | WD40 repeat-containing protein                                     | Spartin                                                             |
| ORF2                                                                  | RWD domain-containing                                              | Spef2                                                               |
| Coiled-coil domain-containing 180                                     | Envoplakin                                                         | Multiple C2 and transmembrane domain-containing protein             |
| Coatomer subunit beta                                                 | Neurobeachin                                                       | Mitoguardin                                                         |
| Homeobox-containing protein 1                                         | Stathmin                                                           | Major facilitator superfamily domain-containing protein             |
| Probable G-protein coupled receptor 141                               | Immunoglobulin superfamily member                                  | Klra19 protein                                                      |
| Family with sequence similarity 171, member A1                        | Arhgap4 protein                                                    | Kelch-like protein                                                  |
| Kinase non-catalytic C-lobe domain (KIND) containing 1                | LIM domain-binding protein                                         | 60S ribosomal protein                                               |
| Disintegrin and metalloproteinase domain-containing protein 28        | Shugoshin                                                          | Glycine cleavage system P protein                                   |
| Probable tubulin polyglutamylase TTL1                                 | Cep110 protein                                                     | LIM and senescent cell antigen-like-containing domain protein       |
| Pdgfra protein                                                        | Cingulin                                                           | Slp protein                                                         |
| NLR family, pyrin domain containing 4G                                | Mitogen-activated protein kinase kinase kinase kinase              | RING finger protein                                                 |
| KN motif and ankyrin repeat domain-containing protein 2               | Unconventional prefoldin RPB5 interactor                           | ATR-interacting protein                                             |
| Sickle tail protein                                                   | Protein SLX4IP                                                     | NCK-associated protein                                              |
| Docking protein 6                                                     | Caskin                                                             | ADP-ribosylation factor-like protein                                |
| Ubiquitin-conjugating enzyme E2C-binding protein                      | PR domain zinc finger protein                                      | Tripartite motif protein                                            |
| Peroxidasin homolog                                                   | Protein THEMIS                                                     | F-box/LRR-repeat protein                                            |
| Leucine-rich repeat and calponin homology domain-containing protein 2 | Nucleolar GTP-binding protein                                      | Novel KRAB box and zinc finger, C2H2 type domain containing protein |
| 60S ribosomal protein L7                                              | AF4/FMR2 family member 3                                           | Ankyrin repeat domain-containing protein                            |
| X-box-binding protein 1                                               | Nuclear pore complex protein                                       | Multidrug resistance-associated protein                             |
| Activating transcription factor 7-interacting protein 1               | Mesoderm posterior protein                                         | Collagen, type VI, alpha 3                                          |
| Zinc finger CCCH domain-containing protein 15                         | Calcium uptake protein                                             | Synaptosomal-associated protein                                     |
| Tetratricopeptide repeat                                              | Glycoprotein integral membrane protein                             | Smgc protein                                                        |
|                                                                       | Intraflagellar transport protein                                   | Nucleosome assembly protein 1-like                                  |
|                                                                       | Protein turtle                                                     | Calcium-transporting ATPase                                         |
|                                                                       | Leucine-rich repeat and guanylate kinase domain-containing protein | TATA box binding protein                                            |
|                                                                       | Ubiquitin carboxyl-terminal hydrolase 17-like protein              | BTB (POZ) domain-containing                                         |
|                                                                       | 4921511C04Rik protein                                              |                                                                     |
|                                                                       | RNA-binding motif protein                                          |                                                                     |
|                                                                       | Nuclear protein                                                    |                                                                     |
|                                                                       | Calmodulin-regulated spectrin-associated protein                   |                                                                     |

|                                                                                                                                                                                                                                                                                                                                                                                                                                                                                                                                                                                                                                                                                                                                                                                                                                                                                                                                                                                                                                                                                                                                                                                                                                               |                                                                                                                                                                                                                                                                                                                                                                                                                                                                                                                                                                                                                                                                                                                                                                                                                                                                                                                                                                                                                                                                                                                                                                                     |                                                                                                                                                                                                                                                                                                                                                                                                                                                                                                                                                                                                                                                                                                                                                                                                                                                                                                                                                                                                                                                                                                                                                                                |
|-----------------------------------------------------------------------------------------------------------------------------------------------------------------------------------------------------------------------------------------------------------------------------------------------------------------------------------------------------------------------------------------------------------------------------------------------------------------------------------------------------------------------------------------------------------------------------------------------------------------------------------------------------------------------------------------------------------------------------------------------------------------------------------------------------------------------------------------------------------------------------------------------------------------------------------------------------------------------------------------------------------------------------------------------------------------------------------------------------------------------------------------------------------------------------------------------------------------------------------------------|-------------------------------------------------------------------------------------------------------------------------------------------------------------------------------------------------------------------------------------------------------------------------------------------------------------------------------------------------------------------------------------------------------------------------------------------------------------------------------------------------------------------------------------------------------------------------------------------------------------------------------------------------------------------------------------------------------------------------------------------------------------------------------------------------------------------------------------------------------------------------------------------------------------------------------------------------------------------------------------------------------------------------------------------------------------------------------------------------------------------------------------------------------------------------------------|--------------------------------------------------------------------------------------------------------------------------------------------------------------------------------------------------------------------------------------------------------------------------------------------------------------------------------------------------------------------------------------------------------------------------------------------------------------------------------------------------------------------------------------------------------------------------------------------------------------------------------------------------------------------------------------------------------------------------------------------------------------------------------------------------------------------------------------------------------------------------------------------------------------------------------------------------------------------------------------------------------------------------------------------------------------------------------------------------------------------------------------------------------------------------------|
| <p>protein 28<br/> Armadillo-like helical domain-containing 1<br/> Tetratricopeptide repeat protein 19, mitochondrial<br/> Zinc finger FYVE domain-containing protein 16<br/> Calmodulin-binding transcription activator 2<br/> EH-domain containing 4<br/> Acyl-CoA-binding domain-containing protein 6<br/> 2610507B11Rik protein<br/> Dynein, axonemal, heavy chain 10<br/> Protein zyg-11 homolog B<br/> Olfactory receptor<br/> RNA polymerase-associated protein RTF1 homolog<br/> rRNA-processing protein FCF1 homolog<br/> Zinc finger SCAN domains 29<br/> Triple functional domain protein<br/> Protein SOGA3<br/> ADP-ribosylation factor-binding protein GGA1<br/> Cyclin-D-binding Myb-like transcription factor 1<br/> Arylacetamide deacetylase-like 4<br/> Integrin alpha-E<br/> Fc receptor-like A<br/> ZZ-type zinc finger-containing protein 3<br/> KN motif and ankyrin repeat domain-containing protein 3<br/> Potassium/sodium hyperpolarization-activated cyclic nucleotide-gated channel 3<br/> Coiled-coil domain containing 83, isoform CRA_b<br/> Regulator of microtubule dynamics protein 1<br/> RNA-binding protein 26<br/> Transmembrane protein 163<br/> Protein FAM13B<br/> STE20-related kinase adapter</p> | <p>Sodium bicarbonate transporter-like protein<br/> Serrate RNA effector molecule homolog<br/> Angiopoietin-related protein<br/> Golgi autoantigen golgin subfamily a5<br/> Spry1 protein<br/> Slfn8 protein<br/> Homeobox-containing protein<br/> Lethal(2) giant larvae protein<br/> Charged multivesicular body protein<br/> Nucleosome assembly protein<br/> Peroxisome biogenesis factor 1<br/> Transmembrane protein<br/> LETM1 domain-containing protein<br/> C2 calcium-dependent domain-containing<br/> MAGUK p55 subfamily member 5<br/> Structural maintenance of chromosomes protein<br/> von Willebrand factor A domain-containing protein<br/> tRNA wybutosine-synthesizing protein<br/> Methyl-CpG-binding domain protein<br/> Fermitin family homolog 2<br/> Hermansky-Pudlak syndrome 6 protein<br/> Nebulin<br/> Gamma-crystallin<br/> Wiz protein<br/> Nuclear factor interleukin-3-regulated protein<br/> PC4 and SFRS1-interacting protein<br/> Protein MMS22-like<br/> T-lymphoma invasion and metastasis-inducing protein<br/> C1qtnf1 protein<br/> Ankyrin repeat, SAM and basic leucine zipper domain-containing protein<br/> Fibroblast growth factor</p> | <p>M-protein<br/> Solute carrier family 13 (Sodium/sulfate symporters), member 4<br/> Mitochondrial assembly of ribosomal large subunit protein<br/> Sodium channel and clathrin linker 1<br/> Fanconi anemia, complementation group E<br/> Up-regulated during skeletal muscle growth protein<br/> DNA repair and recombination protein<br/> Neuropeptides B/W receptor type 1<br/> Clasp2 protein<br/> AP-1 complex subunit gamma-like 2<br/> Clathrin heavy chain<br/> Disks large homolog 3<br/> Leucine-rich repeat flightless-interacting protein<br/> Patatin-like phospholipase domain-containing protein<br/> CASP8 and FADD-like apoptosis regulator<br/> Muscular LMNA-interacting protein<br/> Spermatogenesis-associated glutamate (E)-rich protein<br/> START domain-containing protein<br/> Tissue-resident T-cell transcription regulator protein<br/> Lebercilin<br/> Rfc2 protein<br/> Ankyrin repeat and LEM domain-containing protein<br/> Destrin<br/> Amyloid-beta A4 precursor protein-binding family B member 2<br/> Structural maintenance of chromosomes protein<br/> Fat storage-inducing transmembrane protein<br/> Sperm-tail PG-rich repeat-</p> |
|-----------------------------------------------------------------------------------------------------------------------------------------------------------------------------------------------------------------------------------------------------------------------------------------------------------------------------------------------------------------------------------------------------------------------------------------------------------------------------------------------------------------------------------------------------------------------------------------------------------------------------------------------------------------------------------------------------------------------------------------------------------------------------------------------------------------------------------------------------------------------------------------------------------------------------------------------------------------------------------------------------------------------------------------------------------------------------------------------------------------------------------------------------------------------------------------------------------------------------------------------|-------------------------------------------------------------------------------------------------------------------------------------------------------------------------------------------------------------------------------------------------------------------------------------------------------------------------------------------------------------------------------------------------------------------------------------------------------------------------------------------------------------------------------------------------------------------------------------------------------------------------------------------------------------------------------------------------------------------------------------------------------------------------------------------------------------------------------------------------------------------------------------------------------------------------------------------------------------------------------------------------------------------------------------------------------------------------------------------------------------------------------------------------------------------------------------|--------------------------------------------------------------------------------------------------------------------------------------------------------------------------------------------------------------------------------------------------------------------------------------------------------------------------------------------------------------------------------------------------------------------------------------------------------------------------------------------------------------------------------------------------------------------------------------------------------------------------------------------------------------------------------------------------------------------------------------------------------------------------------------------------------------------------------------------------------------------------------------------------------------------------------------------------------------------------------------------------------------------------------------------------------------------------------------------------------------------------------------------------------------------------------|

|                                                                                                                                                                                                                                                                                                                                                                                                                                                                                                                                                                                                                                                                                                                                                                                                                                                                                                                                                                                                                                                                                                                                                                                 |                                                                                                                                                                                                                                                                                                                                                                                                                                                                                                                                                                                                                                                                                                                                                                                                                                                                                                                                                                                                                                                                                                                                                                                                               |                                                                                                                                                                                                                                                                                                                                                                                                                                                                                                                                                                                                                                                                                                                                                                                                                                                                                                                                                                                                                                                                                                                                                                                                                                                                                                      |
|---------------------------------------------------------------------------------------------------------------------------------------------------------------------------------------------------------------------------------------------------------------------------------------------------------------------------------------------------------------------------------------------------------------------------------------------------------------------------------------------------------------------------------------------------------------------------------------------------------------------------------------------------------------------------------------------------------------------------------------------------------------------------------------------------------------------------------------------------------------------------------------------------------------------------------------------------------------------------------------------------------------------------------------------------------------------------------------------------------------------------------------------------------------------------------|---------------------------------------------------------------------------------------------------------------------------------------------------------------------------------------------------------------------------------------------------------------------------------------------------------------------------------------------------------------------------------------------------------------------------------------------------------------------------------------------------------------------------------------------------------------------------------------------------------------------------------------------------------------------------------------------------------------------------------------------------------------------------------------------------------------------------------------------------------------------------------------------------------------------------------------------------------------------------------------------------------------------------------------------------------------------------------------------------------------------------------------------------------------------------------------------------------------|------------------------------------------------------------------------------------------------------------------------------------------------------------------------------------------------------------------------------------------------------------------------------------------------------------------------------------------------------------------------------------------------------------------------------------------------------------------------------------------------------------------------------------------------------------------------------------------------------------------------------------------------------------------------------------------------------------------------------------------------------------------------------------------------------------------------------------------------------------------------------------------------------------------------------------------------------------------------------------------------------------------------------------------------------------------------------------------------------------------------------------------------------------------------------------------------------------------------------------------------------------------------------------------------------|
| <p>protein beta<br/>Paraneoplastic antigen Ma1 homolog<br/>Probable global transcription activator SNF2L2<br/>Disintegrin and metalloproteinase domain-containing protein 23<br/>Protein fem-1 homolog B<br/>Bromo adjacent homology domain-containing 1 protein<br/>Actin-related protein T3<br/>Adipocyte plasma membrane-associated protein<br/>EH domain-binding protein 1<br/>FUN14 domain-containing protein 1<br/>Interferon regulatory factor 7<br/>CREB-regulated transcription coactivator 2<br/>Rap guanine nucleotide exchange factor (GEF) 6<br/>MANSC domain containing 1<br/>BRI3-binding protein<br/>Telomerase-binding protein EST1A<br/>Leukocyte cell-derived chemotaxin-2<br/>Chondroitin sulfate proteoglycan 4<br/>Nucleolar protein 11<br/>BCL2-associated athanogene 4<br/>Nucleolar complex protein 3 homolog<br/>tRNA (uracil(54)-C(5))-methyltransferase homolog<br/>Neurotensin receptor 1<br/>Peroxisome biogenesis factor 10<br/>Nuclear pore complex protein Nup54<br/>Transient receptor potential cation channel subfamily M member 5<br/>Arginyl-tRNA--protein transferase 1<br/>Proline-rich 36<br/>Plec1 protein<br/>Dynactin subunit 6</p> | <p>Period circadian protein<br/>Melanocortin 5 receptor<br/>Podn protein<br/>Glutamate-rich<br/>Follistatin-related protein<br/>F-box/LRR-repeat protein<br/>Cytoplasmic FMR1-interacting protein<br/>AT-hook DNA-binding motif-containing protein<br/>LisH domain-containing protein<br/>Protein NPAT<br/>DNA repair and recombination protein<br/>Pyridine nucleotide-disulfide oxidoreductase domain-containing protein<br/>Protein cereblon<br/>Fanconi anemia, complementation group E<br/>Mastermind-like protein<br/>Vacuolar protein sorting 13D<br/>La-related protein<br/>PHD finger protein<br/>Protein transport protein<br/>G-protein coupled receptor-associated sorting protein<br/>Retinoic acid receptor responder protein<br/>Calmegin<br/>Transcription factor HIVEP3<br/>Helix-loop-helix protein<br/>Os9 protein<br/>Epb4.1I2 protein<br/>Smoothelin-like protein<br/>Bcl-2-interacting killer<br/>ADP-ribosylation factor-like protein 6-interacting protein<br/>Nuclear receptor-interacting protein<br/>Transforming growth factor-beta receptor-associated protein<br/>40S ribosomal protein<br/>Cysteine-rich perinuclear theca protein<br/>Nup153 protein<br/>Camsap11 protein</p> | <p>containing protein<br/>BEN domain-containing protein<br/>Sh3tc1 protein<br/>PHD finger protein<br/>Asxl2 protein<br/>TATA box-binding protein-like protein<br/>HMW-kininogen-II variant<br/>Hematopoietic lineage cell-specific protein<br/>Homeobox protein<br/>Methyl-CpG-binding protein<br/>Elongation of very long chain fatty acids protein<br/>Krev interaction trapped protein<br/>F-BAR domain only protein<br/>CASP8-associated protein<br/>Protein Smaug homolog 2<br/>Proliferation marker protein<br/>Ephrin type-B receptor 4<br/>Calcium homeostasis endoplasmic reticulum protein<br/>Epiplakin<br/>Intraflagellar transport protein<br/>MICAL-like protein<br/>Histidine-rich glycoprotein<br/>NACHT, leucine rich repeat and PYD containing 10<br/>Vitellogenin-like 1<br/>Actin-related protein 2/3 complex subunit 5-like protein<br/>EH domain-binding protein<br/>Dach1 protein<br/>Kifc1 protein<br/>Kinesin light chain<br/>Retinal degeneration 3-like<br/>DNA repair protein<br/>Bone morphogenetic protein<br/>Nuclear protein<br/>Collagen alpha-1(XII) chain<br/>Nup214 protein<br/>Zinc finger protein-like<br/>Ceramide-1-phosphate transfer protein<br/>Choline transporter-like protein<br/>Ankyrin repeat and SOCS box protein<br/>Dickkopf-related protein</p> |
|---------------------------------------------------------------------------------------------------------------------------------------------------------------------------------------------------------------------------------------------------------------------------------------------------------------------------------------------------------------------------------------------------------------------------------------------------------------------------------------------------------------------------------------------------------------------------------------------------------------------------------------------------------------------------------------------------------------------------------------------------------------------------------------------------------------------------------------------------------------------------------------------------------------------------------------------------------------------------------------------------------------------------------------------------------------------------------------------------------------------------------------------------------------------------------|---------------------------------------------------------------------------------------------------------------------------------------------------------------------------------------------------------------------------------------------------------------------------------------------------------------------------------------------------------------------------------------------------------------------------------------------------------------------------------------------------------------------------------------------------------------------------------------------------------------------------------------------------------------------------------------------------------------------------------------------------------------------------------------------------------------------------------------------------------------------------------------------------------------------------------------------------------------------------------------------------------------------------------------------------------------------------------------------------------------------------------------------------------------------------------------------------------------|------------------------------------------------------------------------------------------------------------------------------------------------------------------------------------------------------------------------------------------------------------------------------------------------------------------------------------------------------------------------------------------------------------------------------------------------------------------------------------------------------------------------------------------------------------------------------------------------------------------------------------------------------------------------------------------------------------------------------------------------------------------------------------------------------------------------------------------------------------------------------------------------------------------------------------------------------------------------------------------------------------------------------------------------------------------------------------------------------------------------------------------------------------------------------------------------------------------------------------------------------------------------------------------------------|

|                                                                                                                                                                                                                                                                                                                                                                                                                                                                                                                                                                                                                                                                                                                                                                                                                                                                                                                                                                                                                                                                                                                                                                                                                                                                                                                                 |                                                                                                                                                                                                                                                                                                                                                                                                                                                                                                                                                                                                                                                                                                                                                                                                                                                                                                                                                                                                                                                                                                                                                   |                                                                                                                                                                                                                                                                                                                                                                                                                                                                                                                                                                                                                                                                                                                                                                                                                                                                                                                                                                                                                                                                                                                                                                                                                                                                                        |
|---------------------------------------------------------------------------------------------------------------------------------------------------------------------------------------------------------------------------------------------------------------------------------------------------------------------------------------------------------------------------------------------------------------------------------------------------------------------------------------------------------------------------------------------------------------------------------------------------------------------------------------------------------------------------------------------------------------------------------------------------------------------------------------------------------------------------------------------------------------------------------------------------------------------------------------------------------------------------------------------------------------------------------------------------------------------------------------------------------------------------------------------------------------------------------------------------------------------------------------------------------------------------------------------------------------------------------|---------------------------------------------------------------------------------------------------------------------------------------------------------------------------------------------------------------------------------------------------------------------------------------------------------------------------------------------------------------------------------------------------------------------------------------------------------------------------------------------------------------------------------------------------------------------------------------------------------------------------------------------------------------------------------------------------------------------------------------------------------------------------------------------------------------------------------------------------------------------------------------------------------------------------------------------------------------------------------------------------------------------------------------------------------------------------------------------------------------------------------------------------|----------------------------------------------------------------------------------------------------------------------------------------------------------------------------------------------------------------------------------------------------------------------------------------------------------------------------------------------------------------------------------------------------------------------------------------------------------------------------------------------------------------------------------------------------------------------------------------------------------------------------------------------------------------------------------------------------------------------------------------------------------------------------------------------------------------------------------------------------------------------------------------------------------------------------------------------------------------------------------------------------------------------------------------------------------------------------------------------------------------------------------------------------------------------------------------------------------------------------------------------------------------------------------------|
| <p>Family with sequence similarity 129, member C</p> <p>LIM homeobox transcription factor 1-beta</p> <p>BMP/retinoic acid-inducible neural-specific protein 1</p> <p>Vacuolar protein sorting-associated protein 13C</p> <p>Ubiquitin carboxyl-terminal hydrolase 37</p> <p>CUB and sushi domain-containing protein 3</p> <p>Dynein regulatory complex subunit 4</p> <p>WD repeat domain 97</p> <p>Slit homolog 2 protein</p> <p>Sacsin</p> <p>Tubulin-specific chaperone D</p> <p>EF-hand calcium-binding domain-containing protein 3</p> <p>MAP7 domain-containing protein 3</p> <p>Polycomb protein SCMH1</p> <p>Midasin</p> <p>G protein-coupled receptor kinase</p> <p>Phosphatidylinositol-glycan biosynthesis class F protein</p> <p>Cytochrome b561 domain-containing protein 2</p> <p>Protein odd-skipped-related 2</p> <p>FYVE, RhoGEF and PH domain-containing protein 1</p> <p>KRR1 small subunit processome component homolog</p> <p>Transient receptor potential cation channel subfamily M member 8</p> <p>THO complex subunit 2</p> <p>Arylsulfatase I</p> <p>FYVE and coiled-coil domain-containing protein 1</p> <p>Protocadherin-8</p> <p>Disks large homolog 1</p> <p>Protein salvador homolog 1</p> <p>O-acyltransferase like protein</p> <p>Ubiquitin recognition factor in ER-associated degradation</p> | <p>Holliday junction recognition protein</p> <p>G patch domain-containing protein</p> <p>Telomeric repeat-binding factor ASL1/Glx2 fusion protein</p> <p>Prpsap2 protein</p> <p>Sec24d protein</p> <p>Sperm-associated antigen 16 protein</p> <p>Cadherin-like and PC-esterase domain-containing</p> <p>Fat 1 cadherin</p> <p>Calcium-binding protein</p> <p>Sarm1 protein</p> <p>Catenin delta-1</p> <p>Maestro heat-like repeat-containing protein</p> <p>Probable G-protein coupled receptor</p> <p>Spf2</p> <p>Extracellular matrix protein</p> <p>Rieske domain-containing protein</p> <p>Cadherin EGF LAG seven-pass G-type receptor</p> <p>Methenyltetrahydrofolate synthase domain-containing protein</p> <p>Multimerin</p> <p>Hermansky-Pudlak syndrome 1 protein</p> <p>Recq15 protein</p> <p>Ap3d1 protein</p> <p>ZZ-type zinc finger-containing protein</p> <p>Adenomatous polyposis coli protein</p> <p>NAC-alpha domain-containing protein</p> <p>APC membrane recruitment protein</p> <p>Desmoplakin</p> <p>Ube4a protein</p> <p>Abi3bp protein</p> <p>Irx2 protein</p> <p>BCL-6 corepressor-like protein</p> <p>Pdzd7 protein</p> | <p>Ribosome maturation protein</p> <p>Dynamin-3</p> <p>Synaptonemal complex protein</p> <p>Centromere protein</p> <p>Caveolae-associated protein</p> <p>SH3 domain and tetratricopeptide repeats</p> <p>Transforming growth factor-beta receptor-associated protein</p> <p>Formin-binding protein 1-like</p> <p>Camsap111 protein</p> <p>Syntaxin-16</p> <p>Haloacid dehalogenase-like hydrolase domain-containing protein</p> <p>Trichohyalin-like protein</p> <p>Laminin subunit alpha-1</p> <p>Nucleus accumbens-associated protein</p> <p>Ankyrin repeat and KH domain-containing</p> <p>PX domain-containing protein</p> <p>Vimentin-type intermediate filament-associated coiled-coil protein</p> <p>Spermatogenesis-associated protein</p> <p>M-phase inducer phosphatase</p> <p>Syntaxin-11</p> <p>Low-density lipoprotein receptor-related protein</p> <p>Endoplasmic reticulum junction formation protein</p> <p>Thyroglobulin</p> <p>Rab interacting lysosomal protein</p> <p>Complement C3</p> <p>Fibulin-1</p> <p>Vlgr1</p> <p>BIV spectrin</p> <p>Protein RMD5 homolog B</p> <p>Sorting nexin-21</p> <p>AF4/FMR2 family member 3</p> <p>Recq15 protein</p> <p>Integrator complex subunit 11</p> <p>SLAIN motif-containing protein</p> <p>Protein inscuteable homolog</p> |
|---------------------------------------------------------------------------------------------------------------------------------------------------------------------------------------------------------------------------------------------------------------------------------------------------------------------------------------------------------------------------------------------------------------------------------------------------------------------------------------------------------------------------------------------------------------------------------------------------------------------------------------------------------------------------------------------------------------------------------------------------------------------------------------------------------------------------------------------------------------------------------------------------------------------------------------------------------------------------------------------------------------------------------------------------------------------------------------------------------------------------------------------------------------------------------------------------------------------------------------------------------------------------------------------------------------------------------|---------------------------------------------------------------------------------------------------------------------------------------------------------------------------------------------------------------------------------------------------------------------------------------------------------------------------------------------------------------------------------------------------------------------------------------------------------------------------------------------------------------------------------------------------------------------------------------------------------------------------------------------------------------------------------------------------------------------------------------------------------------------------------------------------------------------------------------------------------------------------------------------------------------------------------------------------------------------------------------------------------------------------------------------------------------------------------------------------------------------------------------------------|----------------------------------------------------------------------------------------------------------------------------------------------------------------------------------------------------------------------------------------------------------------------------------------------------------------------------------------------------------------------------------------------------------------------------------------------------------------------------------------------------------------------------------------------------------------------------------------------------------------------------------------------------------------------------------------------------------------------------------------------------------------------------------------------------------------------------------------------------------------------------------------------------------------------------------------------------------------------------------------------------------------------------------------------------------------------------------------------------------------------------------------------------------------------------------------------------------------------------------------------------------------------------------------|

|                                                                                                                                                                                                                                                                                                                                                                                                                                                                                                                                                                                                                                                                                                                                                                                                                                                                                                                                                                                                                                                                                                                                                                           |                                                                                                                                                                                                                                                                                                                                                                                                                                                                                                                                                                                                                                                                                                                                                                                                                                                                                                                                                                                                                                                                                                                                                                                |                                                                                                                                                                                                                                                                                                                                                                                                                                                                                                                                                                                                                                                                                                                                                                                                                                                                                                                                                                                                                                                                                                                                                                                                                                                                 |
|---------------------------------------------------------------------------------------------------------------------------------------------------------------------------------------------------------------------------------------------------------------------------------------------------------------------------------------------------------------------------------------------------------------------------------------------------------------------------------------------------------------------------------------------------------------------------------------------------------------------------------------------------------------------------------------------------------------------------------------------------------------------------------------------------------------------------------------------------------------------------------------------------------------------------------------------------------------------------------------------------------------------------------------------------------------------------------------------------------------------------------------------------------------------------|--------------------------------------------------------------------------------------------------------------------------------------------------------------------------------------------------------------------------------------------------------------------------------------------------------------------------------------------------------------------------------------------------------------------------------------------------------------------------------------------------------------------------------------------------------------------------------------------------------------------------------------------------------------------------------------------------------------------------------------------------------------------------------------------------------------------------------------------------------------------------------------------------------------------------------------------------------------------------------------------------------------------------------------------------------------------------------------------------------------------------------------------------------------------------------|-----------------------------------------------------------------------------------------------------------------------------------------------------------------------------------------------------------------------------------------------------------------------------------------------------------------------------------------------------------------------------------------------------------------------------------------------------------------------------------------------------------------------------------------------------------------------------------------------------------------------------------------------------------------------------------------------------------------------------------------------------------------------------------------------------------------------------------------------------------------------------------------------------------------------------------------------------------------------------------------------------------------------------------------------------------------------------------------------------------------------------------------------------------------------------------------------------------------------------------------------------------------|
| <p>protein 1<br/> Protein sidekick-2<br/> Eml1 protein<br/> Pyridoxine-5'-phosphate oxidase<br/> Collagen alpha-1(XIV) chain<br/> WD repeat-containing protein 81<br/> Toll-like receptor 11<br/> AMP deaminase 1<br/> Ryanodine receptor 2<br/> Kinesin-like protein KIF1B<br/> Nxt2 protein<br/> GAS2-like protein 2<br/> Abnormal spindle-like microcephaly-associated protein homolog<br/> Potassium channel tetramerisation domain-containing 17<br/> Myotubularin-related protein 1<br/> Tricarboxylate transport protein, mitochondrial<br/> Mitogen-activated protein kinase kinase kinase 4<br/> Protein regulator of cytokinesis 1<br/> Single-minded homolog 1<br/> Trafficking protein particle complex subunit 9<br/> EGF-containing fibulin-like extracellular matrix protein 2<br/> Cation channel sperm-associated protein subunit gamma 2<br/> Tubulin polyglutamylase TTL11<br/> Adhesion G protein-coupled receptor V1<br/> RAD50-interacting protein 1<br/> CCAAT/enhancer-binding protein zeta<br/> Slc35d1 protein<br/> Kinectin<br/> 2-(3-amino-3-carboxypropyl)histidine synthase subunit 2<br/> Bactericidal permeability-increasing protein</p> | <p>Vinculin<br/> Protein fem-1<br/> Microtubule-actin cross-linking factor<br/> Forkhead-associated domain-containing protein<br/> Serine/arginine-rich splicing factor<br/> Krupple-related zinc finger protein<br/> NACHT and WD repeat domain-containing protein<br/> HEPACAM family member<br/> Muscular LMNA-interacting protein<br/> Probable JmjC domain-containing histone demethylation protein<br/> Plexin<br/> DNA mismatch repair protein<br/> Protein FAM3D<br/> Dedicator of cytokinesis protein<br/> Regulator of G-protein signaling<br/> Ankyrin repeat and LEM domain-containing protein<br/> Mitochondria-eating protein<br/> Transforming growth factor-alpha<br/> Receptor expression-enhancing protein<br/> Sodium channel and clathrin linker<br/> Kelch domain containing MICAL-like protein<br/> MLX interacting protein-like beta<br/> Protein Smaug<br/> Pro-interleukin-16<br/> Tuberin<br/> Vesicle transport protein<br/> PX domain-containing protein<br/> Sodium- and chloride-dependent glycine transporter<br/> Patatin-like phospholipase domain-containing protein<br/> Duox2 protein<br/> Tigger transposable element-derived protein</p> | <p>RNA-binding motif protein<br/> Insulin gene enhancer protein<br/> ISL-2<br/> Basement membrane-specific heparan sulfate proteoglycan core protein<br/> NUT family member 1<br/> Baculoviral IAP repeat-containing protein<br/> Selenium-binding protein<br/> Vacuolar protein sorting 13D<br/> Gamma-aminobutyric acid receptor subunit alpha-3<br/> Alpha-2-macroglobulin receptor-associated protein<br/> Sickle tail protein<br/> Leucine-rich repeats and WD repeat domain-containing 1<br/> SH3 and multiple ankyrin repeat domains protein<br/> Viral protein<br/> Jarid2 protein<br/> Voltage-dependent anion-selective channel protein<br/> Myosin-binding protein C, cardiac-type<br/> 39S ribosomal protein L14, mitochondrial<br/> Hermansky-Pudlak syndrome<br/> Tau-tubulin kinase 1<br/> 60S ribosome subunit biogenesis protein NIP7 homolog<br/> Sodium channel protein type 10 subunit alpha<br/> PIH1 domain-containing protein<br/> Oasl2 protein<br/> Proteasome subunit beta type<br/> piRNA biogenesis protein<br/> Chloride channel protein<br/> LIM domain and actin-binding protein<br/> Neurobeachin<br/> Aprataxin<br/> Follistatin<br/> Nck-associated protein 1-like<br/> Basal body-orientation factor 1<br/> Podn protein</p> |
|---------------------------------------------------------------------------------------------------------------------------------------------------------------------------------------------------------------------------------------------------------------------------------------------------------------------------------------------------------------------------------------------------------------------------------------------------------------------------------------------------------------------------------------------------------------------------------------------------------------------------------------------------------------------------------------------------------------------------------------------------------------------------------------------------------------------------------------------------------------------------------------------------------------------------------------------------------------------------------------------------------------------------------------------------------------------------------------------------------------------------------------------------------------------------|--------------------------------------------------------------------------------------------------------------------------------------------------------------------------------------------------------------------------------------------------------------------------------------------------------------------------------------------------------------------------------------------------------------------------------------------------------------------------------------------------------------------------------------------------------------------------------------------------------------------------------------------------------------------------------------------------------------------------------------------------------------------------------------------------------------------------------------------------------------------------------------------------------------------------------------------------------------------------------------------------------------------------------------------------------------------------------------------------------------------------------------------------------------------------------|-----------------------------------------------------------------------------------------------------------------------------------------------------------------------------------------------------------------------------------------------------------------------------------------------------------------------------------------------------------------------------------------------------------------------------------------------------------------------------------------------------------------------------------------------------------------------------------------------------------------------------------------------------------------------------------------------------------------------------------------------------------------------------------------------------------------------------------------------------------------------------------------------------------------------------------------------------------------------------------------------------------------------------------------------------------------------------------------------------------------------------------------------------------------------------------------------------------------------------------------------------------------|

|                                                                  |                                                                        |                                                               |
|------------------------------------------------------------------|------------------------------------------------------------------------|---------------------------------------------------------------|
| Inositol 1,4,5-trisphosphate receptor type 2                     | SRR1-like protein                                                      | Titin                                                         |
| Muscular LMNA-interacting protein                                | Tanc1 protein                                                          | Transportin-1                                                 |
| PX domain-containing protein 1                                   | GTP-binding protein                                                    | Small conductance calcium-activated potassium channel protein |
| Syntaxin-binding protein 5                                       | WW domain-containing adapter protein with coiled-coil                  | CD209 antigen-like protein                                    |
| Limbic system-associated membrane protein                        | IQ motif and SEC7 domain-containing protein                            | ERO1-like beta                                                |
| Tripartite motif-containing 60                                   | Utrophin                                                               | Gamma-crystallin B                                            |
| Kalirin                                                          | F-box only protein                                                     | Aladin                                                        |
| Serine/threonine-protein kinase PLK4                             | Multidrug resistance-associated protein                                | Neurexin-1                                                    |
| Coronin-6                                                        | Zinc finger B-box domain-containing protein                            | LON peptidase N-terminal domain and RING finger protein       |
| NF-kappa-B inhibitor-interacting                                 | Zinc finger E-box-binding homeobox                                     | MLX-interacting protein                                       |
| Ras-like protein 1                                               | Junctophilin                                                           | TRAF3-interacting protein                                     |
| Trafficking protein particle complex subunit 11                  | Acetolactate synthase-like protein                                     | Seminal vesicle secretory protein                             |
| Transitional endoplasmic reticulum ATPase                        | Kinesin superfamily protein                                            | Protein Hook homolog 1                                        |
| Transient receptor potential cation channel subfamily A member 1 | Synaptic nuclear envelope                                              | Myomesin-1                                                    |
| Acyl-Coenzyme A dehydrogenase family, member 12                  | Glial fibrillary acidic protein                                        | Vacuolar protein sorting-associated protein 28 homolog        |
| Trim25 protein                                                   | Alpha- and gamma-adaptin-binding protein                               | PTB domain-containing engulfment adapter protein              |
| Arginase-2, mitochondrial                                        | Myotubularin-related protein                                           | Papolg protein                                                |
| Acyl-CoA thioesterase 8, isoform CRA_c                           | Spectrin beta chain                                                    | Complement component 6                                        |
| Calcium-activated chloride channel regulator 1                   | Centrobilin                                                            | Speckle-type POZ protein-like                                 |
| ATP-binding cassette sub-family A member 7                       | Thioredoxin domain-containing protein                                  | ASL1 fusion protein                                           |
| Transmembrane protein 160                                        | Rps16 protein                                                          | Mas-related G protein-coupled receptor g15                    |
| Ppig protein                                                     | EF-hand calcium-binding domain-containing protein                      | Erythroid membrane-associated protein                         |
| Cbp37                                                            | Huntingtin                                                             | ScFv B8E5 protein                                             |
| X-ray radiation resistance-associated protein 1                  | Actin filament-associated protein                                      | Inactive hydroxysteroid dehydrogenase-like protein            |
| Disks large-associated protein 2                                 | Immunoglobulin-like and fibronectin type III domain-containing protein | CPXV019 protein                                               |
| Snf2-related CREBBP activator protein                            | LEM domain-containing protein                                          | Sister chromatid cohesion protein PDS5 homolog B              |
| ATP-binding cassette sub-family G member 2                       | Calpain                                                                | SUN domain-containing protein                                 |
| Astrotactin-2                                                    | Proline-rich protein                                                   | Leucine-rich repeat and IQ domain-containing protein          |
| Multiple C2 and transmembrane domain-containing protein 2        | Claudin                                                                | Potassium voltage-gated channel subfamily B member 2          |
| Dynamin-binding protein                                          | Pumilio                                                                | Acetolactate synthase-like protein                            |
|                                                                  | Afadin                                                                 | Glutamine and serine-rich 1                                   |
|                                                                  | Dock9 protein                                                          | Golgb1 protein                                                |
|                                                                  | Fibrous sheath-interacting protein                                     | Pre-mRNA-splicing factor                                      |
|                                                                  | Bromodomain adjacent to zinc finger domain protein                     | RBM22                                                         |
|                                                                  |                                                                        | Myocardin                                                     |

|                                                                                                                                                                                                                                                                                                                                                                                                                                                                                                                                                                                                                                                                                                                                                                                                                                                                                                                                                                                                                                                                                                                                                       |                                                                                                                                                                                                                                                                                                                                                                                                                                                                                                                                                                                                                                                                                                                                                                                                                                                                                                                                                                                                                                                                                                                                                                                              |                                                                                                                                                                                                                                                                                                                                                                                                                                                                                                                                                                                                                                                                                                                                                                                                                                                                                                                                                                                                                                                                                                                                                                            |
|-------------------------------------------------------------------------------------------------------------------------------------------------------------------------------------------------------------------------------------------------------------------------------------------------------------------------------------------------------------------------------------------------------------------------------------------------------------------------------------------------------------------------------------------------------------------------------------------------------------------------------------------------------------------------------------------------------------------------------------------------------------------------------------------------------------------------------------------------------------------------------------------------------------------------------------------------------------------------------------------------------------------------------------------------------------------------------------------------------------------------------------------------------|----------------------------------------------------------------------------------------------------------------------------------------------------------------------------------------------------------------------------------------------------------------------------------------------------------------------------------------------------------------------------------------------------------------------------------------------------------------------------------------------------------------------------------------------------------------------------------------------------------------------------------------------------------------------------------------------------------------------------------------------------------------------------------------------------------------------------------------------------------------------------------------------------------------------------------------------------------------------------------------------------------------------------------------------------------------------------------------------------------------------------------------------------------------------------------------------|----------------------------------------------------------------------------------------------------------------------------------------------------------------------------------------------------------------------------------------------------------------------------------------------------------------------------------------------------------------------------------------------------------------------------------------------------------------------------------------------------------------------------------------------------------------------------------------------------------------------------------------------------------------------------------------------------------------------------------------------------------------------------------------------------------------------------------------------------------------------------------------------------------------------------------------------------------------------------------------------------------------------------------------------------------------------------------------------------------------------------------------------------------------------------|
| <p>Ankyrin-2<br/> Long-chain fatty acid transport protein 3<br/> TBP-associated factor 170<br/> ATP-binding cassette sub-family B member 7, mitochondrial<br/> Beta-1-syntrophin<br/> Collagen alpha-4(VI) chain<br/> Extracellular matrix protein<br/> FRAS1<br/> Bloom syndrome protein homolog<br/> Copper-transporting ATPase 2<br/> Il2rb protein<br/> Transcription initiation factor IIE subunit beta<br/> Desmoglein-3<br/> 60 kDa glycoprotein<br/> Calcium/calmodulin-dependent protein kinase II inhibitor 2<br/> Stonin-2<br/> TAP2<br/> Inactive hydroxysteroid dehydrogenase-like protein 1<br/> Cardiotrophin 2<br/> Decorin<br/> BTB/POZ domain-containing protein KCTD9<br/> Cystatin<br/> Usherin<br/> Hermansky-Pudlak syndrome 6 protein homolog<br/> Low-voltage-activated calcium channel alpha13.3 subunit<br/> Protocadherin beta 15<br/> Serine/threonine-protein kinase ULK1<br/> Dynein, axonemal, heavy chain 7B<br/> Tyrosine-protein kinase receptor<br/> Solute carrier family 12, member 7<br/> Xanthine dehydrogenase/oxidase<br/> Zinc finger and BTB domain-containing protein 46<br/> Zinc finger BED domain-</p> | <p>Tubulin epsilon and delta complex protein<br/> DEP domain-containing protein<br/> UV radiation resistance-associated protein<br/> Peroxisome proliferator-activated receptor gamma coactivator-related protein<br/> Kalirin<br/> Thyroxine-binding globulin<br/> Non-specific lipid-transfer protein<br/> Microtubule-associated tumor suppressor<br/> Cadherin<br/> Transducin beta-like protein<br/> Protein timeless homolog<br/> RILP-like protein<br/> Protein Hook homolog<br/> PDZ domain containing RING finger<br/> Band 4.1-like protein<br/> AT-hook-containing transcription factor<br/> NCK-associated protein<br/> MAP7 domain-containing protein<br/> Syntaxin-binding protein<br/> Ankyrin repeat and SOCS box protein<br/> MRN complex-interacting protein<br/> Metal transporter<br/> FERM and PDZ domain-containing protein<br/> Atlastin<br/> Zona pellucida sperm-binding protein<br/> Heme-binding protein<br/> LINE-1 retrotransposable element ORF2 protein<br/> Contactin<br/> Huntingtin-associated protein<br/> RNA binding motif protein<br/> Osteocalcin<br/> Methyltransferase-like protein<br/> Transformation/transcription domain-associated protein</p> | <p>Actn1 protein<br/> Homer protein homolog 1<br/> Protein NPAT<br/> Period circadian protein homolog 1<br/> Mirror-image polydactyly gene 1 protein homolog<br/> Cadherin-24<br/> Forkhead box protein R2<br/> Adarb2 protein<br/> NHS-like protein<br/> Rootletin<br/> Mcm3ap protein<br/> Synergism gamma<br/> Gm1070 protein<br/> GTP-binding protein<br/> Kinesin heavy chain isoform 5C<br/> Protein fem-1 homolog A-B<br/> Arf-GAP with Rho-GAP domain, ANK repeat and PH domain-containing protein<br/> Protein FAM13A<br/> Caskin1 protein<br/> HN1-like protein<br/> Protein FAM189B<br/> Pdap1 protein<br/> KH homology domain-containing protein<br/> CDK5 regulatory subunit associated protein<br/> CLIP-associating protein<br/> Regulator complex protein<br/> Cas scaffolding protein<br/> Claspin<br/> Hippocalcin-like protein<br/> Actin filament-associated protein<br/> Kinectin<br/> Interferon-induced GTP-binding protein<br/> Follistatin-related protein<br/> ARF GTPase-activating protein<br/> MyoD family inhibitor domain-containing protein<br/> Cysteine and glycine-rich protein<br/> Peptidylprolyl isomerase domain and WD repeat-</p> |
|-------------------------------------------------------------------------------------------------------------------------------------------------------------------------------------------------------------------------------------------------------------------------------------------------------------------------------------------------------------------------------------------------------------------------------------------------------------------------------------------------------------------------------------------------------------------------------------------------------------------------------------------------------------------------------------------------------------------------------------------------------------------------------------------------------------------------------------------------------------------------------------------------------------------------------------------------------------------------------------------------------------------------------------------------------------------------------------------------------------------------------------------------------|----------------------------------------------------------------------------------------------------------------------------------------------------------------------------------------------------------------------------------------------------------------------------------------------------------------------------------------------------------------------------------------------------------------------------------------------------------------------------------------------------------------------------------------------------------------------------------------------------------------------------------------------------------------------------------------------------------------------------------------------------------------------------------------------------------------------------------------------------------------------------------------------------------------------------------------------------------------------------------------------------------------------------------------------------------------------------------------------------------------------------------------------------------------------------------------------|----------------------------------------------------------------------------------------------------------------------------------------------------------------------------------------------------------------------------------------------------------------------------------------------------------------------------------------------------------------------------------------------------------------------------------------------------------------------------------------------------------------------------------------------------------------------------------------------------------------------------------------------------------------------------------------------------------------------------------------------------------------------------------------------------------------------------------------------------------------------------------------------------------------------------------------------------------------------------------------------------------------------------------------------------------------------------------------------------------------------------------------------------------------------------|



|                                                                                                                                                                                                                                                                                                                                                                                                                                                                                                                                                                                                                                                                                                                                                                                                                                                                                                                                                                                                                                                                                                                                                              |                                                                                                                                                                                                                                                                                                                                                                                                                                                                                                                                                                                                                                                                                                                                                                                                                                                                                                                                                                                                                                                                                                                                                                                                      |                                                                                                                                                                                                                                                                                                                                                                                                                                                                                                                                                                                                                                                                                                                                                                                                                                                                                                                                                                                                                                                                                                                                               |
|--------------------------------------------------------------------------------------------------------------------------------------------------------------------------------------------------------------------------------------------------------------------------------------------------------------------------------------------------------------------------------------------------------------------------------------------------------------------------------------------------------------------------------------------------------------------------------------------------------------------------------------------------------------------------------------------------------------------------------------------------------------------------------------------------------------------------------------------------------------------------------------------------------------------------------------------------------------------------------------------------------------------------------------------------------------------------------------------------------------------------------------------------------------|------------------------------------------------------------------------------------------------------------------------------------------------------------------------------------------------------------------------------------------------------------------------------------------------------------------------------------------------------------------------------------------------------------------------------------------------------------------------------------------------------------------------------------------------------------------------------------------------------------------------------------------------------------------------------------------------------------------------------------------------------------------------------------------------------------------------------------------------------------------------------------------------------------------------------------------------------------------------------------------------------------------------------------------------------------------------------------------------------------------------------------------------------------------------------------------------------|-----------------------------------------------------------------------------------------------------------------------------------------------------------------------------------------------------------------------------------------------------------------------------------------------------------------------------------------------------------------------------------------------------------------------------------------------------------------------------------------------------------------------------------------------------------------------------------------------------------------------------------------------------------------------------------------------------------------------------------------------------------------------------------------------------------------------------------------------------------------------------------------------------------------------------------------------------------------------------------------------------------------------------------------------------------------------------------------------------------------------------------------------|
| <p>containing protein 6<br/>Transcription termination factor 1<br/>Coiled-coil and C2 domain-containing 2B<br/>Thyroid hormone receptor interactor 11<br/>Cyclin-dependent kinase 15<br/>Phospholipid-transporting ATPase IK<br/>Collagen alpha-2(XI) chain<br/>Optic atrophy 3 protein homolog<br/>DCN1-like protein 2<br/>Disheveled-associated activator of morphogenesis 1<br/>Cytochrome P450 2C29 MCG130490<br/>Nuclear factor NF-kappa-B p100 subunit<br/>60S acidic ribosomal protein P0<br/>Nuclear fragile X mental retardation-interacting protein 1<br/>Receptor tyrosine-protein kinase erbB-2<br/>Atypical kinase COQ8B, mitochondrial<br/>Collagen alpha-1(XXIV) chain<br/>Protein SOGA1<br/>Sodium channel protein type 3 subunit alpha<br/>Cyclin-H<br/>Ribosomal protein S6 kinase<br/>Activating transcription factor 7-interacting protein 2<br/>Active breakpoint cluster region-related protein<br/>Kinesin-like protein KIF21A<br/>Dystrophin<br/>Nebulin<br/>La-related protein 6<br/>60S ribosomal protein L34<br/>Transmembrane protein 108<br/>Pregnancy-specific glycoprotein 21<br/>Ladinin-1<br/>Mitogen-activated protein</p> | <p>Carbohydrate-responsive element-binding protein<br/>Leucine-rich repeat and death domain-containing protein<br/>Usherin<br/>MICAL C-terminal-like protein<br/>Copa protein<br/>Protein RFT1 homolog<br/>Dmwd protein<br/>E1A-binding protein<br/>TPR and ankyrin repeat-containing protein<br/>Bardet-Biedl syndrome 10 protein<br/>Protocadherin Fat<br/>NHL repeat containing<br/>Contactin-associated protein<br/>Protein scribble<br/>Cacna2d4 protein<br/>GATOR complex protein<br/>AP2-interacting clathrin-endocytosis protein<br/>IQ motif-containing<br/>Extra large alpha stimulating guanine-nucleotide binding protein<br/>TatD DNase domain-containing<br/>Myelin basic protein<br/>Plec1 protein<br/>Zinc finger CCCH-type antiviral protein<br/>U3 small nucleolar ribonucleoprotein protein<br/>Pregnancy-specific glycoprotein<br/>Arginine and glutamate-rich protein<br/>Mitogen-activated protein kinase-binding protein<br/>Alpha1-chimerin<br/>XK-related protein<br/>Cpn2 protein<br/>Brain-specific angiogenesis inhibitor 1-associated protein<br/>Secretagoin<br/>Chloride channel protein<br/>Zinc finger FYVE domain-containing protein<br/>Thrombospondin type-1</p> | <p>containing protein<br/>Pericentrin<br/>Multimerin-2<br/>Forkhead box N2<br/>Fc fragment of IgG-binding protein<br/>Protein DBF4 homolog A<br/>Myelin protein zero-like protein<br/>Leucine-rich PPR motif-containing protein,<br/>mitochondrial<br/>LARP7<br/>NAC-alpha domain-containing protein<br/>ATP-binding cassette sub-family B member 9<br/>Kinesin-like protein<br/>Solute carrier family 22 member 8<br/>Lamin-B2<br/>PWWP domain-containing 2B<br/>Apolipoprotein B-100<br/>270-kDa ankyrinG<br/>S phase cyclin A-associated protein in the ER<br/>Cullin-3<br/>Carbohydrate-responsive element-binding protein<br/>Similar to (NP_033194.1) src homology 2 domain-containing transforming protein<br/>Cubilin<br/>Coiled-coil and C2 domain-containing protein<br/>Sonic hedgehog protein<br/>Copper transport protein<br/>ATOX1<br/>Protein ERGIC-53-like<br/>Guanine nucleotide-binding protein subunit alpha-12<br/>Slc2a13 protein<br/>LisH domain-containing protein<br/>ARMC9<br/>AT-rich interactive domain-containing protein 2<br/>Hippocalcin-like protein 1<br/>Nuclear factor interleukin-3-regulated protein</p> |
|--------------------------------------------------------------------------------------------------------------------------------------------------------------------------------------------------------------------------------------------------------------------------------------------------------------------------------------------------------------------------------------------------------------------------------------------------------------------------------------------------------------------------------------------------------------------------------------------------------------------------------------------------------------------------------------------------------------------------------------------------------------------------------------------------------------------------------------------------------------------------------------------------------------------------------------------------------------------------------------------------------------------------------------------------------------------------------------------------------------------------------------------------------------|------------------------------------------------------------------------------------------------------------------------------------------------------------------------------------------------------------------------------------------------------------------------------------------------------------------------------------------------------------------------------------------------------------------------------------------------------------------------------------------------------------------------------------------------------------------------------------------------------------------------------------------------------------------------------------------------------------------------------------------------------------------------------------------------------------------------------------------------------------------------------------------------------------------------------------------------------------------------------------------------------------------------------------------------------------------------------------------------------------------------------------------------------------------------------------------------------|-----------------------------------------------------------------------------------------------------------------------------------------------------------------------------------------------------------------------------------------------------------------------------------------------------------------------------------------------------------------------------------------------------------------------------------------------------------------------------------------------------------------------------------------------------------------------------------------------------------------------------------------------------------------------------------------------------------------------------------------------------------------------------------------------------------------------------------------------------------------------------------------------------------------------------------------------------------------------------------------------------------------------------------------------------------------------------------------------------------------------------------------------|

|                                                                                                                                                                                                                                                                                                                                                                                                                                                                                                                                                                                                                                                                                                                                                                                                                                                                                                                                                                                                                                                                                                                    |                                                                                                                                                                                                                                                                                                                                                                                                                                                                                                                                                                                                                                                                                                                                                                                                                                                                                                                                                                                                                                                     |                                                                                                                                                                                                                                                                                                                                                                                                                                                                                                                                                                                                                                                                                                                                                                                                                                                                                                                                                                                                                                                                                                                                                                        |
|--------------------------------------------------------------------------------------------------------------------------------------------------------------------------------------------------------------------------------------------------------------------------------------------------------------------------------------------------------------------------------------------------------------------------------------------------------------------------------------------------------------------------------------------------------------------------------------------------------------------------------------------------------------------------------------------------------------------------------------------------------------------------------------------------------------------------------------------------------------------------------------------------------------------------------------------------------------------------------------------------------------------------------------------------------------------------------------------------------------------|-----------------------------------------------------------------------------------------------------------------------------------------------------------------------------------------------------------------------------------------------------------------------------------------------------------------------------------------------------------------------------------------------------------------------------------------------------------------------------------------------------------------------------------------------------------------------------------------------------------------------------------------------------------------------------------------------------------------------------------------------------------------------------------------------------------------------------------------------------------------------------------------------------------------------------------------------------------------------------------------------------------------------------------------------------|------------------------------------------------------------------------------------------------------------------------------------------------------------------------------------------------------------------------------------------------------------------------------------------------------------------------------------------------------------------------------------------------------------------------------------------------------------------------------------------------------------------------------------------------------------------------------------------------------------------------------------------------------------------------------------------------------------------------------------------------------------------------------------------------------------------------------------------------------------------------------------------------------------------------------------------------------------------------------------------------------------------------------------------------------------------------------------------------------------------------------------------------------------------------|
| <p>kinase kinase kinase 12<br/>Ankyrin repeat domain-containing protein 27<br/>MKIAA4149 protein<br/>Scm-like with four MBT domains protein 2<br/>WD repeat and SOCS box-containing 1<br/>DENN domain-containing protein 5B<br/>Ankrd11 protein<br/>Flotillin-2<br/>Ubiquitin carboxyl-terminal hydrolase 17-like protein B<br/>Nucleotide-binding oligomerization domain-containing protein 1<br/>Immunoglobulin lambda-like polypeptide 1<br/>Mon2 protein<br/>Kelch-like protein 21<br/>M18 protein<br/>CaM kinase-like vesicle-associated protein<br/>Multiple C2 and transmembrane domain-containing protein 1<br/>28S ribosomal protein S28, mitochondrial<br/>Signal-induced proliferation-associated 1-like protein 3<br/>Testis-specific serine kinase substrate<br/>Maestro heat-like repeat-containing protein family member 7<br/>Methyl-CpG-binding domain protein 5<br/>Activity-dependent neuroprotector homeobox protein 2<br/>Metabotropic glutamate receptor 2<br/>6kDa intracellular viral protein<br/>ASL1/Herc2 fusion protein<br/>Disabled homolog 2<br/>Transcription factor AP-2 gamma</p> | <p>domain-containing protein<br/>Tetraspanin<br/>60S ribosome subunit biogenesis protein<br/>Rotatin<br/>Leucine-rich repeat transmembrane neuronal protein<br/>Secretogranin<br/>Rtkn2 protein<br/>Crlf1 protein<br/>SUN domain-containing protein<br/>Proteasome subunit alpha type-5<br/>MutS protein<br/>Krt6b protein<br/>Vigilin<br/>Coiled-coil domain containing<br/>Complement component receptor 1-like protein<br/>Afamin<br/>IQ domain-containing protein<br/>SorCS3<br/>Protein CASP<br/>Trafficking protein particle complex subunit<br/>Ca2+-dependent activator protein for secretion 2 isoform e<br/>Fancg protein<br/>Sacsin<br/>Ankyrin repeat and EF-hand domain-containing protein<br/>Putative Polycomb group protein<br/>SET domain bifurcated protein<br/>CMT1A duplicated region transcript 4 protein<br/>Host cell factor<br/>Podocin<br/>Lipoxygenase homology domain-containing protein<br/>L1 unspliced fusion gene protein<br/>Polymerase delta-interacting protein<br/>Pcdh20 protein<br/>Presenilins-associated</p> | <p>F9 protein<br/>DNA mismatch repair protein<br/>Synaptotagmin-like protein<br/>Sperm-associated antigen 16 protein<br/>Chromodomain helicase DNA-binding protein<br/>Fibrous sheath-interacting protein<br/>Cep110 protein<br/>40S ribosomal protein<br/>Sex comb on midleg-like protein<br/>Specifically androgen-regulated gene protein<br/>Protein crumbs homolog<br/>Sacsin<br/>Protein prune homolog 2<br/>Calcium-binding protein<br/>Actin filament-associated protein 1-like 2<br/>Transcription elongation factor A protein-like 1<br/>ADP-ribosylation factor-related protein<br/>Intestinal peptide transporter PEPT1<br/>Cytoplasmic phosphatidylinositol transfer protein<br/>Wiz protein<br/>Catenin delta-1<br/>Mastermind-like protein 1<br/>KRAB-zinc finger protein 78<br/>Neuroplastin<br/>Smoothelin-like protein<br/>G patch domain-containing protein<br/>YLP motif-containing protein<br/>Lta protein<br/>Egl nine homolog 3<br/>FYVE and coiled-coil domain-containing protein<br/>Membrane-associated guanylate kinase, WW and PDZ domain-containing protein<br/>Fidgetin-like protein<br/>DmX-like protein<br/>V-set and transmembrane</p> |
|--------------------------------------------------------------------------------------------------------------------------------------------------------------------------------------------------------------------------------------------------------------------------------------------------------------------------------------------------------------------------------------------------------------------------------------------------------------------------------------------------------------------------------------------------------------------------------------------------------------------------------------------------------------------------------------------------------------------------------------------------------------------------------------------------------------------------------------------------------------------------------------------------------------------------------------------------------------------------------------------------------------------------------------------------------------------------------------------------------------------|-----------------------------------------------------------------------------------------------------------------------------------------------------------------------------------------------------------------------------------------------------------------------------------------------------------------------------------------------------------------------------------------------------------------------------------------------------------------------------------------------------------------------------------------------------------------------------------------------------------------------------------------------------------------------------------------------------------------------------------------------------------------------------------------------------------------------------------------------------------------------------------------------------------------------------------------------------------------------------------------------------------------------------------------------------|------------------------------------------------------------------------------------------------------------------------------------------------------------------------------------------------------------------------------------------------------------------------------------------------------------------------------------------------------------------------------------------------------------------------------------------------------------------------------------------------------------------------------------------------------------------------------------------------------------------------------------------------------------------------------------------------------------------------------------------------------------------------------------------------------------------------------------------------------------------------------------------------------------------------------------------------------------------------------------------------------------------------------------------------------------------------------------------------------------------------------------------------------------------------|

|                                                                                                                                                                                                                                                                                                                                                                                                                                                                                                                                                                                                                                                                                                                                                                                                                                                                                                                                                                                                                                                                                                                                                                                                                                                                                                                     |                                                                                                                                                                                                                                                                                                                                                                                                                                                                                                                                                                                                                                                                                                                                                                                                                                                                                                                                                                                                                                                                                                                        |                                                                                                                                                                                                                                                                                                                                                                                                                                                                                                                                                                                                                                                                                                                                                                                                                                                                                                                                                                                                                                                                                                                              |
|---------------------------------------------------------------------------------------------------------------------------------------------------------------------------------------------------------------------------------------------------------------------------------------------------------------------------------------------------------------------------------------------------------------------------------------------------------------------------------------------------------------------------------------------------------------------------------------------------------------------------------------------------------------------------------------------------------------------------------------------------------------------------------------------------------------------------------------------------------------------------------------------------------------------------------------------------------------------------------------------------------------------------------------------------------------------------------------------------------------------------------------------------------------------------------------------------------------------------------------------------------------------------------------------------------------------|------------------------------------------------------------------------------------------------------------------------------------------------------------------------------------------------------------------------------------------------------------------------------------------------------------------------------------------------------------------------------------------------------------------------------------------------------------------------------------------------------------------------------------------------------------------------------------------------------------------------------------------------------------------------------------------------------------------------------------------------------------------------------------------------------------------------------------------------------------------------------------------------------------------------------------------------------------------------------------------------------------------------------------------------------------------------------------------------------------------------|------------------------------------------------------------------------------------------------------------------------------------------------------------------------------------------------------------------------------------------------------------------------------------------------------------------------------------------------------------------------------------------------------------------------------------------------------------------------------------------------------------------------------------------------------------------------------------------------------------------------------------------------------------------------------------------------------------------------------------------------------------------------------------------------------------------------------------------------------------------------------------------------------------------------------------------------------------------------------------------------------------------------------------------------------------------------------------------------------------------------------|
| Collagen alpha-1(XXVIII) chain<br>Calsyntenin-2<br>Myotubularin-related protein 3<br>Phosphatidylinositol 3-kinase<br>catalytic subunit type 3<br>Transcription factor AP-2-delta<br>Laminin subunit alpha-3<br>Ankyrin repeat and EF-hand<br>domain-containing protein 1<br>Importin subunit alpha<br>Nuclear pore complex protein<br>Nup98-Nup96<br>VPS9-ankyrin-repeat protein<br>Coro2a protein<br>Centlein<br>Cyclin-dependent kinase 2-<br>interacting protein<br>Oocyte-specific homeobox 2<br>Spermatogenesis-associated<br>protein 13<br>Exocyst complex component 5<br>Vasodilator-stimulated<br>phosphoprotein<br>Homeobox-containing protein<br>11<br>Pleckstrin homology domain-<br>containing family O member 1<br>Slc24a2 protein<br>Cyclic nucleotide-gated cation<br>channel alpha-3<br>Kinetochores scaffold 1<br>Protein unc-13 homolog C<br>A-kinase anchor protein 9<br>KIAA1739 protein<br>TRAF family member-associated<br>NF-kappa-B activator<br>Meiosis inhibitor protein 1<br>Protein fem-1 homolog A-B<br>H/ACA ribonucleoprotein<br>complex subunit 2<br>Torsin-3A<br>ATP synthase mitochondrial F1<br>complex assembly factor 1<br>Brain-specific angiogenesis<br>inhibitor 1-associated protein 2<br>Protein kinase C and casein<br>kinase II substrate protein 3<br>Complement C4-B | rhomboid-like protein<br>Paired box protein<br>Protein Churchill<br>AAM-B protein<br>Ataxin-2-like protein<br>Drebrin-like protein<br>Spartin<br>Sulfonylurea receptor<br>Slit homolog 1 protein<br>Polycystin<br>Synaptonemal complex protein<br>Myxovirus influenza virus<br>resistance protein<br>PDZ domain-containing protein<br>SH3 and cysteine-rich domain-<br>containing protein<br>Formin<br>TERF1-interacting nuclear factor<br>Phip protein<br>Cullin<br>Retinol-binding protein<br>Box C/D snoRNA protein<br>Storkhead-box protein<br>Albumin<br>ErbB2ip protein<br>Pregnancy zone protein<br>U3 small nucleolar RNA-<br>interacting protein<br>Pcdha7 protein<br>Zfp384 protein<br>Protein SCA1<br>Pyridoxal-dependent<br>decarboxylase domain-<br>containing protein<br>Centlein<br>Vacuolar protein sorting-<br>associated protein<br>Leucine-rich repeat and WD<br>repeat-containing protein<br>Protein yippee-like<br>Proliferation marker protein<br>SCY1-like protein<br>Calbindin<br>Protein DBF4<br>Claudin domain-containing<br>protein<br>Cysteine-rich secretory protein<br>Arhgef10l protein | domain-containing protein<br>Muscle protein<br>N-terminal EF-hand calcium-<br>binding protein<br>Meiosis-specific coiled-coil<br>domain-containing protein<br>Sct protein<br>Transient receptor potential<br>cation channel subfamily A<br>member 1<br>Pikachurin<br>F-actin-capping protein subunit<br>alpha-1<br>Exocyst complex component 3-<br>like protein<br>RILP-like protein<br>Cell division cycle protein 27<br>homolog<br>Villin-like protein<br>WD repeat and FYVE domain-<br>containing protein<br>Semaphorin-3C<br>Integral membrane protein<br>Autophagy protein<br>Vimentin<br>La-related protein<br>Ap3d1 protein<br>Fanconi anemia protein<br>Pro-interleukin-16<br>Pericentriolar material 1 protein<br>Beta-actin-like protein<br>Laminin subunit alpha-2<br>Protein mab-21-like<br>GATOR complex protein<br>Rps6ka3 protein<br>Myotubularin-related protein<br>Periostin<br>Involucrin<br>Glial fibrillary acidic protein<br>Taste receptor type 2 member<br>39<br>1-aminocyclopropane-1-<br>carboxylate synthase-like<br>protein<br>Protein FAM208B<br>Angiomotin<br>Palladin<br>Abnormal spindle-like |
|---------------------------------------------------------------------------------------------------------------------------------------------------------------------------------------------------------------------------------------------------------------------------------------------------------------------------------------------------------------------------------------------------------------------------------------------------------------------------------------------------------------------------------------------------------------------------------------------------------------------------------------------------------------------------------------------------------------------------------------------------------------------------------------------------------------------------------------------------------------------------------------------------------------------------------------------------------------------------------------------------------------------------------------------------------------------------------------------------------------------------------------------------------------------------------------------------------------------------------------------------------------------------------------------------------------------|------------------------------------------------------------------------------------------------------------------------------------------------------------------------------------------------------------------------------------------------------------------------------------------------------------------------------------------------------------------------------------------------------------------------------------------------------------------------------------------------------------------------------------------------------------------------------------------------------------------------------------------------------------------------------------------------------------------------------------------------------------------------------------------------------------------------------------------------------------------------------------------------------------------------------------------------------------------------------------------------------------------------------------------------------------------------------------------------------------------------|------------------------------------------------------------------------------------------------------------------------------------------------------------------------------------------------------------------------------------------------------------------------------------------------------------------------------------------------------------------------------------------------------------------------------------------------------------------------------------------------------------------------------------------------------------------------------------------------------------------------------------------------------------------------------------------------------------------------------------------------------------------------------------------------------------------------------------------------------------------------------------------------------------------------------------------------------------------------------------------------------------------------------------------------------------------------------------------------------------------------------|

|                                                                                                                                                                                                                                                                                                                                                                                                                                                                                                                                                                                                                                                                                                                                                                                                                                                                                                                                                                                                                                                                                                                                                                                                                                      |                                                                                                                                                                                                                                                                                                                                                                                                                                                                                                                                                                                                                                                                                                                                                                                                                                                                                                                                                                                                                                                                                                                                                                                  |                                                                                                                                                                                                                                                                                                                                                                                                                                                                                                                                                                                                                                                                                                                                                                                                                                                                                                                                                                                                                                             |
|--------------------------------------------------------------------------------------------------------------------------------------------------------------------------------------------------------------------------------------------------------------------------------------------------------------------------------------------------------------------------------------------------------------------------------------------------------------------------------------------------------------------------------------------------------------------------------------------------------------------------------------------------------------------------------------------------------------------------------------------------------------------------------------------------------------------------------------------------------------------------------------------------------------------------------------------------------------------------------------------------------------------------------------------------------------------------------------------------------------------------------------------------------------------------------------------------------------------------------------|----------------------------------------------------------------------------------------------------------------------------------------------------------------------------------------------------------------------------------------------------------------------------------------------------------------------------------------------------------------------------------------------------------------------------------------------------------------------------------------------------------------------------------------------------------------------------------------------------------------------------------------------------------------------------------------------------------------------------------------------------------------------------------------------------------------------------------------------------------------------------------------------------------------------------------------------------------------------------------------------------------------------------------------------------------------------------------------------------------------------------------------------------------------------------------|---------------------------------------------------------------------------------------------------------------------------------------------------------------------------------------------------------------------------------------------------------------------------------------------------------------------------------------------------------------------------------------------------------------------------------------------------------------------------------------------------------------------------------------------------------------------------------------------------------------------------------------------------------------------------------------------------------------------------------------------------------------------------------------------------------------------------------------------------------------------------------------------------------------------------------------------------------------------------------------------------------------------------------------------|
| <p>RING finger protein 225<br/> Protein bicaudal D homolog 1<br/> Gamma-soluble NSF attachment protein<br/> Sorbin and SH3 domain-containing protein 2<br/> GRB2-associated and regulator of MAPK protein<br/> Alpha-parvin<br/> T-lymphoma invasion and metastasis-inducing protein 2<br/> Folliculin<br/> Rhomboid domain-containing protein 2<br/> Endoplasmic reticulum resident protein 29<br/> Basic leucine zipper transcriptional factor ATF-like<br/> Polycystin-1<br/> Ear5 protein<br/> Transmembrane protein 132D<br/> Orofacial cleft 1 candidate gene 1 protein homolog<br/> Patatin-like phospholipase domain-containing protein 7<br/> CUGBP Elav-like family member 2<br/> Complexin-2<br/> PHD finger protein 3<br/> Paired box protein Pax-1<br/> Zinc finger CW-type PWWP domain protein 1<br/> SH3 and PX domains 2B<br/> Kelch-like 4<br/> Cytoplasmic dynein 2 light intermediate chain 1<br/> Exocyst complex component 7<br/> Tastin<br/> Taste receptor type 2 member 123<br/> SEC14 domain and spectrin repeat-containing protein 1<br/> Early endosome antigen 1<br/> Kinesin-like protein KIF19<br/> cAMP-regulated phosphoprotein 21<br/> Kinesin-like protein KIFC3<br/> ADP-ribosylation factor-</p> | <p>RNA polymerase-associated protein<br/> Kinetochore-associated protein<br/> Pet2 protein<br/> Survival motor neuron protein<br/> Sox21 protein<br/> TAR DNA-binding protein<br/> Prostate tumor-overexpressed gene 1 protein<br/> Anion exchange protein<br/> Zfp595 protein<br/> Fibroblast growth factor-binding protein<br/> Calmodulin-like protein<br/> Synergism gamma<br/> X-box-binding protein<br/> Arf-GAP with SH3 domain, ANK repeat and PH domain-containing protein<br/> Desmoglein<br/> CAP-Gly domain-containing linker protein<br/> High mobility group nucleosome-binding domain-containing protein<br/> Putative DMBT1-like protein<br/> Myb/SANT-like DNA-binding domain-containing protein<br/> NACHT domain- and WD repeat-containing protein<br/> Protein crumbs<br/> Fbxw13 protein<br/> 60S acidic ribosomal protein<br/> Leucine-rich repeat neuronal protein<br/> Peptidoglycan recognition protein<br/> Calsyntenin<br/> Tectonic-3<br/> Transmembrane channel-like protein<br/> Kinetochore protein<br/> Disks large-associated protein<br/> Vasodilator-stimulated phosphoprotein<br/> Tubulin-specific chaperone E<br/> Espn<br/> Mucolipin</p> | <p>microcephaly-associated protein homolog<br/> Uveal autoantigen with coiled-coil domains and ankyrin repeats<br/> Protein Daple<br/> Cactin<br/> Disabled homolog 2-interacting protein<br/> Zkscan2 protein<br/> Double-stranded RNA-binding protein<br/> Cullin-4B<br/> Talin-2<br/> FERM and PDZ domain-containing<br/> A kinase (PRKA) anchor protein<br/> Myelin basic protein<br/> Rab GTPase-binding effector protein<br/> Cnga1 protein<br/> Calcium homeostasis modulator protein<br/> Nucleolar complex protein 2 homolog<br/> Synaptotagmin XII<br/> Olfm4 protein<br/> Nesprin-3<br/> Gas1 protein<br/> Contactin-2<br/> Ligand-dependent nuclear receptor corepressor-like protein<br/> Myomegalin<br/> U4/U6.U5 tri-snRNP-associated protein<br/> Membrane-associated phosphatidylinositol transfer protein<br/> Abca12 protein<br/> Exocyst complex component 2<br/> Nebulin-related-anchoring protein<br/> Claudin<br/> Protein cereblon<br/> snRNA-activating protein complex subunit 2<br/> Gem (Nuclear organelle)</p> |
|--------------------------------------------------------------------------------------------------------------------------------------------------------------------------------------------------------------------------------------------------------------------------------------------------------------------------------------------------------------------------------------------------------------------------------------------------------------------------------------------------------------------------------------------------------------------------------------------------------------------------------------------------------------------------------------------------------------------------------------------------------------------------------------------------------------------------------------------------------------------------------------------------------------------------------------------------------------------------------------------------------------------------------------------------------------------------------------------------------------------------------------------------------------------------------------------------------------------------------------|----------------------------------------------------------------------------------------------------------------------------------------------------------------------------------------------------------------------------------------------------------------------------------------------------------------------------------------------------------------------------------------------------------------------------------------------------------------------------------------------------------------------------------------------------------------------------------------------------------------------------------------------------------------------------------------------------------------------------------------------------------------------------------------------------------------------------------------------------------------------------------------------------------------------------------------------------------------------------------------------------------------------------------------------------------------------------------------------------------------------------------------------------------------------------------|---------------------------------------------------------------------------------------------------------------------------------------------------------------------------------------------------------------------------------------------------------------------------------------------------------------------------------------------------------------------------------------------------------------------------------------------------------------------------------------------------------------------------------------------------------------------------------------------------------------------------------------------------------------------------------------------------------------------------------------------------------------------------------------------------------------------------------------------------------------------------------------------------------------------------------------------------------------------------------------------------------------------------------------------|

|                                                                                                                                                                                                                                                                                                                                                                                                                                                                                                                                                                                                                                                                                                                                                                                                                                                                                                                                                                                                                                                                                                                                             |                                                                                                                                                                                                                                                                                                                                                                                                                                                                                                                                                                                                                                                                                                                                                                                                                                                                                                                                                                                                                                                                                                                                          |                                                                                                                                                                                                                                                                                                                                                                                                                                                                                                                                                                                                                                                                                                                                                                                                                                                                                                                                                                                                                                                                                 |
|---------------------------------------------------------------------------------------------------------------------------------------------------------------------------------------------------------------------------------------------------------------------------------------------------------------------------------------------------------------------------------------------------------------------------------------------------------------------------------------------------------------------------------------------------------------------------------------------------------------------------------------------------------------------------------------------------------------------------------------------------------------------------------------------------------------------------------------------------------------------------------------------------------------------------------------------------------------------------------------------------------------------------------------------------------------------------------------------------------------------------------------------|------------------------------------------------------------------------------------------------------------------------------------------------------------------------------------------------------------------------------------------------------------------------------------------------------------------------------------------------------------------------------------------------------------------------------------------------------------------------------------------------------------------------------------------------------------------------------------------------------------------------------------------------------------------------------------------------------------------------------------------------------------------------------------------------------------------------------------------------------------------------------------------------------------------------------------------------------------------------------------------------------------------------------------------------------------------------------------------------------------------------------------------|---------------------------------------------------------------------------------------------------------------------------------------------------------------------------------------------------------------------------------------------------------------------------------------------------------------------------------------------------------------------------------------------------------------------------------------------------------------------------------------------------------------------------------------------------------------------------------------------------------------------------------------------------------------------------------------------------------------------------------------------------------------------------------------------------------------------------------------------------------------------------------------------------------------------------------------------------------------------------------------------------------------------------------------------------------------------------------|
| <p>interacting protein 1<br/>SH2 domain-containing protein 3C<br/>Dynein, axonemal, heavy chain 14<br/>Zinc finger homeobox protein 4<br/>Prpsap2 protein<br/>Filamin-A-interacting protein 1<br/>DmX-like protein 1<br/>G-protein-signaling modulator 2<br/>Gasdermin-D<br/>Neurexophilin-1<br/>Echinoderm microtubule-associated protein-like 5<br/>Protein DDI1 homolog 1<br/>Myelin protein P0<br/>Ankyrin repeat domain-containing protein 13C<br/>Casein kinase I isoform gamma-1<br/>Fatty acyl-CoA reductase 1<br/>Kelch domain-containing protein 4<br/>WSC domain-containing protein 1<br/>Protein unc-13 homolog D<br/>Pcdh20 protein<br/>Charged multivesicular body protein 4c<br/>BAH and coiled-coil domain-containing protein 1<br/>TRIO and F-actin-binding protein<br/>GLI pathogenesis-related 1-like 3<br/>Vacuolar protein sorting 13D<br/>Otogelin-like protein<br/>snRNA-activating protein complex subunit 3<br/>RNA-binding protein Raly<br/>Protein NLRC5<br/>Zinc finger, C3H1-type-containing<br/>Neuronal apoptosis inhibitory protein 2<br/>Transforming growth factor-alpha<br/>DnaJ homolog subfamily C</p> | <p>LIM domain-containing protein<br/>Vasorin<br/>Leucine-rich repeat and IQ domain-containing protein<br/>Nestin<br/>Serotransferrin<br/>Sodium leak channel non-selective protein<br/>Smage-3 protein<br/>FRAS1-related extracellular matrix protein<br/>Cyclic nucleotide gated channel alpha<br/>Conserved oligomeric Golgi complex subunit<br/>Zinc finger MYM-type protein<br/>Kelch repeat and BTB domain-containing protein<br/>Meiosis inhibitor protein<br/>Interferon gamma inducible protein<br/>Multiple C2 and transmembrane domain-containing protein<br/>Major sperm fibrous sheath protein<br/>Myelin protein zero-like protein<br/>Beta-actin-like protein<br/>Disintegrin and metalloproteinase domain-containing protein<br/>MANSC domain containing<br/>Alpha-hemoglobin stabilizing protein<br/>Aprataxin<br/>Rbbp6 protein<br/>Arf-GAP with GTPase, ANK repeat and PH domain-containing protein<br/>Nuclear receptor-binding protein<br/>Nucleolar complex protein<br/>NACHT, LRR and PYD domains-containing protein<br/>Zfhx3 protein<br/>Nucleolar pre-ribosomal-associated protein<br/>Fat storage-inducing</p> | <p>associated protein<br/>Cilia and flagella-associated protein<br/>Tenascin-N<br/>FAST kinase domain-containing protein<br/>Regulating synaptic membrane exocytosis protein<br/>Envoplakin<br/>Complement factor H-related protein C isoform 2<br/>Stathmin-4<br/>Synaptotagmin-17<br/>Protein KRI1 homolog<br/>Cytoplasmic dynein 1 intermediate chain 2<br/>Calm5 protein<br/>Fanconi anemia, complementation group M<br/>Alpha- and gamma-adaptin-binding protein<br/>Spon1 protein<br/>Dedicator of cytokinesis protein<br/>Cytospin-A<br/>Ephrin-B2<br/>Sarcolemmal membrane-associated protein<br/>Guanine nucleotide-binding protein G(I)/G(S)/G(O) subunit gamma-2<br/>Transmembrane channel-like protein<br/>Vac14 protein<br/>Versican core protein<br/>Period circadian protein homolog 1<br/>Chromodomain-helicase-DNA-binding protein<br/>Iroquois-class homeodomain protein<br/>Sorting nexin-25<br/>ATP synthase protein<br/>Torsin-1A-interacting protein<br/>Alstrom syndrome protein 1 homolog<br/>Alpha-actinin-4<br/>Spondin-2<br/>Thioredoxin-related</p> |
|---------------------------------------------------------------------------------------------------------------------------------------------------------------------------------------------------------------------------------------------------------------------------------------------------------------------------------------------------------------------------------------------------------------------------------------------------------------------------------------------------------------------------------------------------------------------------------------------------------------------------------------------------------------------------------------------------------------------------------------------------------------------------------------------------------------------------------------------------------------------------------------------------------------------------------------------------------------------------------------------------------------------------------------------------------------------------------------------------------------------------------------------|------------------------------------------------------------------------------------------------------------------------------------------------------------------------------------------------------------------------------------------------------------------------------------------------------------------------------------------------------------------------------------------------------------------------------------------------------------------------------------------------------------------------------------------------------------------------------------------------------------------------------------------------------------------------------------------------------------------------------------------------------------------------------------------------------------------------------------------------------------------------------------------------------------------------------------------------------------------------------------------------------------------------------------------------------------------------------------------------------------------------------------------|---------------------------------------------------------------------------------------------------------------------------------------------------------------------------------------------------------------------------------------------------------------------------------------------------------------------------------------------------------------------------------------------------------------------------------------------------------------------------------------------------------------------------------------------------------------------------------------------------------------------------------------------------------------------------------------------------------------------------------------------------------------------------------------------------------------------------------------------------------------------------------------------------------------------------------------------------------------------------------------------------------------------------------------------------------------------------------|

|                                                                                                                                                                                                                                                                                                                                                                                                                                                                                                                                                                                                                                                                                                                                                                                                                                                                                                                                                                                                                                                                                                                                                                                                                     |                                                                                                                                                                                                                                                                                                                                                                                                                                                                                                                                                                                                                                                                                                                                                                                                                                                                                                          |                                                                                                                                                                                                                                                                                                                                                                                                                                                                                                                                                                                                                                                                                                                                                                                                                                                                                                                                                                                                                                                                                                                                                                                                                             |
|---------------------------------------------------------------------------------------------------------------------------------------------------------------------------------------------------------------------------------------------------------------------------------------------------------------------------------------------------------------------------------------------------------------------------------------------------------------------------------------------------------------------------------------------------------------------------------------------------------------------------------------------------------------------------------------------------------------------------------------------------------------------------------------------------------------------------------------------------------------------------------------------------------------------------------------------------------------------------------------------------------------------------------------------------------------------------------------------------------------------------------------------------------------------------------------------------------------------|----------------------------------------------------------------------------------------------------------------------------------------------------------------------------------------------------------------------------------------------------------------------------------------------------------------------------------------------------------------------------------------------------------------------------------------------------------------------------------------------------------------------------------------------------------------------------------------------------------------------------------------------------------------------------------------------------------------------------------------------------------------------------------------------------------------------------------------------------------------------------------------------------------|-----------------------------------------------------------------------------------------------------------------------------------------------------------------------------------------------------------------------------------------------------------------------------------------------------------------------------------------------------------------------------------------------------------------------------------------------------------------------------------------------------------------------------------------------------------------------------------------------------------------------------------------------------------------------------------------------------------------------------------------------------------------------------------------------------------------------------------------------------------------------------------------------------------------------------------------------------------------------------------------------------------------------------------------------------------------------------------------------------------------------------------------------------------------------------------------------------------------------------|
| <p>member 25<br/> ADP-ribosylation factor-like protein 1<br/> Nuclear pore membrane glycoprotein 210<br/> Stathmin-3<br/> Tubby-related protein 4<br/> Low density lipoprotein receptor-related protein 1<br/> Canalicular multispecific organic anion transporter cMOAT<br/> Sterile alpha motif domain-containing protein 9-like<br/> EF-hand calcium-binding domain-containing protein 6<br/> Follistatin-related protein 4<br/> 40S ribosomal protein S5<br/> F-box and WD-40 domain protein 13<br/> tRNA selenocysteine 1-associated protein 1<br/> Truncated env<br/> G patch domain-containing protein 1<br/> MKIAA4106 protein<br/> A-kinase anchor protein 13<br/> Intraflagellar transport protein 172 homolog<br/> SLIT and NTRK-like protein 3<br/> Roundabout homolog 1<br/> Ankyrin repeat domain-containing protein 17<br/> CUB and sushi domain-containing protein 1<br/> Contactin-associated protein-like 3<br/> Opalin<br/> Putative DMBT1-like protein<br/> Intraflagellar transport protein 81 homolog<br/> Cardiomyopathy-associated protein 5<br/> Calcium/calmodulin-dependent protein kinase type II subunit beta<br/> Torsin-1B<br/> Abi3bp protein<br/> WD repeat-containing protein</p> | <p>transmembrane protein<br/> RUN domain-containing protein<br/> FERM domain-containing protein<br/> Sushi, von Willebrand factor type A, EGF and pentraxin domain-containing protein<br/> A-kinase anchor protein<br/> GRAM domain-containing protein<br/> Mirror-image polydactyly gene 1 protein<br/> Numa1 protein<br/> KH domain-containing, RNA-binding, signal transduction-associated protein<br/> Spatacsin<br/> Mitogen-activated protein kinase 8 interacting protein<br/> Hfm1 protein<br/> Filamin-A<br/> Alpha-1B-glycoprotein<br/> Exosc9 protein<br/> Nucleolar protein<br/> DENN domain-containing protein<br/> Sideroflexin<br/> Abcc8 protein<br/> Hydrocephalus-inducing protein<br/> Filamin<br/> Gm1070 protein<br/> Pericentrin<br/> SNO protein<br/> Testin<br/> Protein NipSnap<br/> MKIAA4187 protein<br/> Zkscan2 protein<br/> Testis-expressed protein<br/> Tropomodulin</p> | <p>transmembrane protein<br/> Germinal-center-associated nuclear protein<br/> Ankyrin-3<br/> Dynein regulatory complex protein<br/> Macrosialin<br/> Spir-2 protein<br/> U2 snRNP-associated SURP motif-containing protein<br/> Inter-alpha-trypsin inhibitor heavy chain H3<br/> Cell migration-inducing and hyaluronan-binding protein<br/> Folliculin-interacting protein<br/> Gramd4 protein<br/> Hyaluronan and proteoglycan link protein<br/> Calcium-binding protein 39-like<br/> Tudor and KH domain-containing protein<br/> Protein furry homolog<br/> Dock9 protein<br/> Host cell factor 2<br/> Beta-actin-like protein<br/> Survival motor neuron protein isoform h<br/> Brain-specific angiogenesis inhibitor 1-associated protein<br/> NACHT, LRR and PYD domains-containing protein<br/> Late cornified envelope-like proline-rich protein<br/> SLIT and NTRK-like protein<br/> Polyadenylate-binding protein<br/> NEDD4-binding protein<br/> Fibrocystin-L<br/> Lumican<br/> Axin-1<br/> Regucalcin<br/> Protein mago nashi homolog 2<br/> Whirlin<br/> Long-chain fatty acid transport protein<br/> MICAL C-terminal-like protein<br/> GRB2-associated-binding protein<br/> Minichromosome maintenance</p> |
|---------------------------------------------------------------------------------------------------------------------------------------------------------------------------------------------------------------------------------------------------------------------------------------------------------------------------------------------------------------------------------------------------------------------------------------------------------------------------------------------------------------------------------------------------------------------------------------------------------------------------------------------------------------------------------------------------------------------------------------------------------------------------------------------------------------------------------------------------------------------------------------------------------------------------------------------------------------------------------------------------------------------------------------------------------------------------------------------------------------------------------------------------------------------------------------------------------------------|----------------------------------------------------------------------------------------------------------------------------------------------------------------------------------------------------------------------------------------------------------------------------------------------------------------------------------------------------------------------------------------------------------------------------------------------------------------------------------------------------------------------------------------------------------------------------------------------------------------------------------------------------------------------------------------------------------------------------------------------------------------------------------------------------------------------------------------------------------------------------------------------------------|-----------------------------------------------------------------------------------------------------------------------------------------------------------------------------------------------------------------------------------------------------------------------------------------------------------------------------------------------------------------------------------------------------------------------------------------------------------------------------------------------------------------------------------------------------------------------------------------------------------------------------------------------------------------------------------------------------------------------------------------------------------------------------------------------------------------------------------------------------------------------------------------------------------------------------------------------------------------------------------------------------------------------------------------------------------------------------------------------------------------------------------------------------------------------------------------------------------------------------|

|                                                                                                                                                                                                                                                                                                                                                                                                                                                                                                                                                                                                                                                                                                                                                                                                                                                                                                                                                                                                                                                                                                                                                |  |                                                                                                                                                                                                                                                                                                                                                                                                                                                                                                                                                                                                                                                                                                                                                                                                                                                                                                                                                                                                                                                                                                                                                                                                                                 |
|------------------------------------------------------------------------------------------------------------------------------------------------------------------------------------------------------------------------------------------------------------------------------------------------------------------------------------------------------------------------------------------------------------------------------------------------------------------------------------------------------------------------------------------------------------------------------------------------------------------------------------------------------------------------------------------------------------------------------------------------------------------------------------------------------------------------------------------------------------------------------------------------------------------------------------------------------------------------------------------------------------------------------------------------------------------------------------------------------------------------------------------------|--|---------------------------------------------------------------------------------------------------------------------------------------------------------------------------------------------------------------------------------------------------------------------------------------------------------------------------------------------------------------------------------------------------------------------------------------------------------------------------------------------------------------------------------------------------------------------------------------------------------------------------------------------------------------------------------------------------------------------------------------------------------------------------------------------------------------------------------------------------------------------------------------------------------------------------------------------------------------------------------------------------------------------------------------------------------------------------------------------------------------------------------------------------------------------------------------------------------------------------------|
| <p>34<br/> Teneurin-1<br/> Gm1070 protein<br/> GRAM domain-containing protein 1B<br/> C-Jun-amino-terminal kinase-interacting protein 4<br/> Novel KRAB box and zinc finger, C2H2 type domain containing protein<br/> HAUS augmin-like complex subunit 4<br/> Synemin<br/> Peroxisomal targeting signal 1 receptor<br/> Hemoglobin subunit beta-H1<br/> Tubulin epsilon and delta complex protein 2<br/> Outer dense fiber protein 4<br/> Ribosome biogenesis protein NSA2 homolog<br/> Serine/arginine repetitive matrix protein 2<br/> LIM domain-containing protein 1<br/> MCG13589<br/> Tetratricopeptide repeat protein 23<br/> General transcription factor IIE subunit 1<br/> Solute carrier family 12 member 6<br/> KICSTOR complex protein SZT2 Gem (Nuclear organelle) associated protein 5<br/> Ankyrin repeat domain-containing protein 22<br/> Transducin beta-like protein 2<br/> Collagen alpha-1(VII) chain<br/> Small nuclear ribonucleoprotein Sm D1<br/> Neuralized-like protein 2<br/> Inactive tyrosine-protein kinase PEAK1<br/> Larp7 protein<br/> Microtubule-associated protein 4<br/> MAGUK p55 subfamily member</p> |  | <p>domain-containing protein<br/> AN1-type zinc finger protein<br/> Dermatan-sulfate epimerase-like protein<br/> [Protein ADP-ribosylarginine] hydrolase-like protein 1<br/> Myb protein<br/> Zinc finger ZZ-type and EF-hand domain-containing protein<br/> Grm6 protein<br/> Sox21 protein<br/> Paired immunoglobulin-like type 2 receptor alpha<br/> Vezatin<br/> Coatomer subunit beta<br/> Box C/D snoRNA protein<br/> Dgcr6 protein<br/> Nischarin<br/> Pet2 protein<br/> snRNA-activating protein complex subunit 4<br/> Guanine nucleotide-binding protein-like 3-like protein<br/> Nucleoporin NUP35<br/> UPF0454 protein<br/> EF-hand domain containing 1<br/> Receptor tyrosine-protein kinase erbB-3<br/> Peroxidasin homolog<br/> Bcl-2-like protein<br/> MRN complex-interacting protein<br/> Shootin-1<br/> Cohesin subunit SA-1<br/> Serrate RNA effector molecule homolog<br/> Inter-alpha-trypsin inhibitor heavy chain H4<br/> PR domain zinc finger protein<br/> Cyclic AMP-responsive element-binding protein 3-like protein<br/> Transcriptional protein<br/> Pecanex-like protein<br/> Proteasome assembly chaperone<br/> KN motif and ankyrin repeat domain-containing protein<br/> Disintegrin and</p> |
|------------------------------------------------------------------------------------------------------------------------------------------------------------------------------------------------------------------------------------------------------------------------------------------------------------------------------------------------------------------------------------------------------------------------------------------------------------------------------------------------------------------------------------------------------------------------------------------------------------------------------------------------------------------------------------------------------------------------------------------------------------------------------------------------------------------------------------------------------------------------------------------------------------------------------------------------------------------------------------------------------------------------------------------------------------------------------------------------------------------------------------------------|--|---------------------------------------------------------------------------------------------------------------------------------------------------------------------------------------------------------------------------------------------------------------------------------------------------------------------------------------------------------------------------------------------------------------------------------------------------------------------------------------------------------------------------------------------------------------------------------------------------------------------------------------------------------------------------------------------------------------------------------------------------------------------------------------------------------------------------------------------------------------------------------------------------------------------------------------------------------------------------------------------------------------------------------------------------------------------------------------------------------------------------------------------------------------------------------------------------------------------------------|

|                                                                                                                                                         |  |                                                                                                                                                                                                                                                                                                                                                                                                                                                                                                                                                                                                                                                                                                                                                                                                                                                                                                                                                                                                                                                                                                                                                                                                                                 |
|---------------------------------------------------------------------------------------------------------------------------------------------------------|--|---------------------------------------------------------------------------------------------------------------------------------------------------------------------------------------------------------------------------------------------------------------------------------------------------------------------------------------------------------------------------------------------------------------------------------------------------------------------------------------------------------------------------------------------------------------------------------------------------------------------------------------------------------------------------------------------------------------------------------------------------------------------------------------------------------------------------------------------------------------------------------------------------------------------------------------------------------------------------------------------------------------------------------------------------------------------------------------------------------------------------------------------------------------------------------------------------------------------------------|
| <p>6<br/> Transcription factor E4F1<br/> SAPS domain family, member 1<br/> Actin-like 6A, isoform CRA_a<br/> Nuclear receptor-interacting protein 1</p> |  | <p>metalloproteinase domain-containing protein<br/> Meiosis inhibitor protein<br/> Paired box protein<br/> Gamma-aminobutyric acid receptor associated protein<br/> Myoferlin<br/> Zinc finger homeobox protein<br/> Voltage-dependent calcium channel gamma-3 subunit<br/> Unc-93 homolog A<br/> Solute carrier family 2, facilitated glucose transporter member 1<br/> Apolipoprotein L 6<br/> Ral guanine nucleotide dissociation stimulator<br/> Disks large-associated protein<br/> Anion exchange protein<br/> Protein yippee-like<br/> Interleukin-12 subunit alpha<br/> Fibronectin type III domain containing protein<br/> COMM domain containing 2<br/> Lymphocyte-specific protein<br/> MAP kinase-activating death domain protein<br/> Neuropilin-2<br/> Cyclin-T2<br/> WD repeat-containing and planar cell polarity effector protein<br/> WD repeat and HMG-box DNA-binding protein<br/> Tetratricopeptide repeat domain<br/> Roundabout homolog<br/> Protocadherin-8<br/> CAP-Gly domain-containing linker protein<br/> Ubiquitin conjugation factor ATP-binding cassette sub-family A member 7<br/> P2X purinoceptor 1<br/> LysM and putative peptidoglycan-binding domain-containing protein<br/> Exportin</p> |
|---------------------------------------------------------------------------------------------------------------------------------------------------------|--|---------------------------------------------------------------------------------------------------------------------------------------------------------------------------------------------------------------------------------------------------------------------------------------------------------------------------------------------------------------------------------------------------------------------------------------------------------------------------------------------------------------------------------------------------------------------------------------------------------------------------------------------------------------------------------------------------------------------------------------------------------------------------------------------------------------------------------------------------------------------------------------------------------------------------------------------------------------------------------------------------------------------------------------------------------------------------------------------------------------------------------------------------------------------------------------------------------------------------------|



|  |  |                                                                                                                                                                                                                                                                                                                                                                                                                                                                                                                                                                                                                                                                                                                                                                                                                                                                                                                                                                                                                                                                                                                                                                                                       |
|--|--|-------------------------------------------------------------------------------------------------------------------------------------------------------------------------------------------------------------------------------------------------------------------------------------------------------------------------------------------------------------------------------------------------------------------------------------------------------------------------------------------------------------------------------------------------------------------------------------------------------------------------------------------------------------------------------------------------------------------------------------------------------------------------------------------------------------------------------------------------------------------------------------------------------------------------------------------------------------------------------------------------------------------------------------------------------------------------------------------------------------------------------------------------------------------------------------------------------|
|  |  | <p> Vertnin<br/> Cytokine receptor-like factor<br/> Usp4 protein<br/> Kalirin<br/> Nucleolar pre-ribosomal-associated protein<br/> Epb4.1l2 protein<br/> Angiomotin-like protein<br/> Homeobox-containing protein<br/> Dynein light chain Tctex-type 1<br/> Kinetochores protein<br/> Neurocan core protein<br/> SNW domain-containing protein<br/> WD repeat and SOCS box-containing 1<br/> Protein DEK<br/> Nuclear factor of kappa light polypeptide gene enhancer in B-cells inhibitor-like 2<br/> Transcription factor TFIIB component B" homolog<br/> Caspase recruitment domain-containing protein<br/> Semaphorin-6A<br/> Nuclear factor NF-kappa-B p100 subunit<br/> Integrin alpha-5<br/> Ubiquitin conjugation factor E4 B<br/> Transmembrane and coiled-coil domains protein<br/> Nxt2 protein<br/> F-box only protein<br/> Testin<br/> Espin<br/> SWI/SNF-related matrix-associated actin-dependent regulator of chromatin subfamily A-like protein<br/> Leucine zipper protein<br/> Nuclear receptor subfamily 2 group F member 6<br/> TBP-associated factor<br/> Pax6 protein<br/> Cuedc1 protein<br/> Fibroblast growth factor-binding protein<br/> BPI fold-containing family A </p> |
|--|--|-------------------------------------------------------------------------------------------------------------------------------------------------------------------------------------------------------------------------------------------------------------------------------------------------------------------------------------------------------------------------------------------------------------------------------------------------------------------------------------------------------------------------------------------------------------------------------------------------------------------------------------------------------------------------------------------------------------------------------------------------------------------------------------------------------------------------------------------------------------------------------------------------------------------------------------------------------------------------------------------------------------------------------------------------------------------------------------------------------------------------------------------------------------------------------------------------------|

|  |  |                                                                                                                                                                                                                                                                                                                                                                                                                                                                                                                                                                                                                                                                                                                                                                                                                                                                                                                                                                                                                                                                                                                                                                                   |
|--|--|-----------------------------------------------------------------------------------------------------------------------------------------------------------------------------------------------------------------------------------------------------------------------------------------------------------------------------------------------------------------------------------------------------------------------------------------------------------------------------------------------------------------------------------------------------------------------------------------------------------------------------------------------------------------------------------------------------------------------------------------------------------------------------------------------------------------------------------------------------------------------------------------------------------------------------------------------------------------------------------------------------------------------------------------------------------------------------------------------------------------------------------------------------------------------------------|
|  |  | <p> member 3<br/> Beta-parvin<br/> Zinc finger CW-type PWWP domain protein<br/> Thyroid hormone receptor-associated protein<br/> Tln2 protein<br/> Hepatoma-derived growth factor-related protein<br/> Formin-1<br/> F-box/WD repeat-containing protein<br/> Growth factor receptor-bound protein<br/> ASL1/Sycp1 fusion protein<br/> Spectrin beta chain<br/> Tubulin-specific chaperone E<br/> Protein enabled homolog<br/> DENN domain-containing protein<br/> Cardiomyopathy-associated protein<br/> Band 4.1-like protein<br/> Syne/ANC-1 family protein<br/> Sorting nexin-27<br/> Heat shock 70 kDa protein<br/> CSC1-like protein<br/> Single-stranded DNA-binding protein<br/> Zinc finger B-box domain-containing protein<br/> Leucine-rich repeat and death domain-containing protein<br/> H/ACA ribonucleoprotein complex subunit 1<br/> Activating transcription factor 7-interacting protein<br/> Copa protein<br/> Stomatin-like protein<br/> Ankyrin-2<br/> Protein strawberry notch homolog<br/> RNA/DNA-binding protein<br/> Protocadherin-8<br/> Nuclear fragile X mental retardation-interacting protein<br/> Zinc finger FYVE domain-containing protein </p> |
|--|--|-----------------------------------------------------------------------------------------------------------------------------------------------------------------------------------------------------------------------------------------------------------------------------------------------------------------------------------------------------------------------------------------------------------------------------------------------------------------------------------------------------------------------------------------------------------------------------------------------------------------------------------------------------------------------------------------------------------------------------------------------------------------------------------------------------------------------------------------------------------------------------------------------------------------------------------------------------------------------------------------------------------------------------------------------------------------------------------------------------------------------------------------------------------------------------------|

|  |  |                                                                                                                                                                                                                                                                                                                                                                                                                                                                                                                                                                                                                                                                                                                                                                                                                                                                                                                                                                                                                                                                                                                                                                                                           |
|--|--|-----------------------------------------------------------------------------------------------------------------------------------------------------------------------------------------------------------------------------------------------------------------------------------------------------------------------------------------------------------------------------------------------------------------------------------------------------------------------------------------------------------------------------------------------------------------------------------------------------------------------------------------------------------------------------------------------------------------------------------------------------------------------------------------------------------------------------------------------------------------------------------------------------------------------------------------------------------------------------------------------------------------------------------------------------------------------------------------------------------------------------------------------------------------------------------------------------------|
|  |  | <p> Nurim<br/> Ankyrin repeat and SAM domain-containing protein<br/> Interferon-activable protein<br/> Myogenic factor<br/> EH domain-binding protein 1-like protein<br/> PRAME family member<br/> Enoyl-CoA hydratase domain-containing protein<br/> Peroxisome biogenesis factor<br/> Focal adhesion kinase<br/> FYVE, RhoGEF and PH domain-containing protein<br/> Protein phantom<br/> Transcription cofactor vestigial-like protein<br/> Cyclin-A2<br/> FERM domain-containing protein<br/> Unconventional prefoldin RPB5 interactor<br/> CMT1A duplicated region transcript 4 protein homolog<br/> Microtubule-actin cross-linking factor<br/> Selection and upkeep of intraepithelial T-cells protein<br/> Apolipoprotein C-IV<br/> MICOS complex subunit Mic25<br/> Kinase D-interacting substrate<br/> Rhpn2 protein<br/> Laminin subunit alpha-5<br/> Filamin-C<br/> Tectonic-2<br/> Neuropathy target esterase kinase anchor protein<br/> Testis-specific Y-encoded-like protein<br/> Sp100 protein<br/> Huntingtin-interacting protein 1-related protein<br/> Arginine and glutamate-rich protein<br/> Delta-like protein<br/> Homeobox protein cut-like<br/> Cd72 protein<br/> Septin-5 </p> |
|--|--|-----------------------------------------------------------------------------------------------------------------------------------------------------------------------------------------------------------------------------------------------------------------------------------------------------------------------------------------------------------------------------------------------------------------------------------------------------------------------------------------------------------------------------------------------------------------------------------------------------------------------------------------------------------------------------------------------------------------------------------------------------------------------------------------------------------------------------------------------------------------------------------------------------------------------------------------------------------------------------------------------------------------------------------------------------------------------------------------------------------------------------------------------------------------------------------------------------------|

|  |  |                                                                                                                                                                                                                                                                                                                                                                                                                                                                                                                                                                                                                                                                                                                                                                                                                                                                                                                                                                                                                                                                                                                                                                             |
|--|--|-----------------------------------------------------------------------------------------------------------------------------------------------------------------------------------------------------------------------------------------------------------------------------------------------------------------------------------------------------------------------------------------------------------------------------------------------------------------------------------------------------------------------------------------------------------------------------------------------------------------------------------------------------------------------------------------------------------------------------------------------------------------------------------------------------------------------------------------------------------------------------------------------------------------------------------------------------------------------------------------------------------------------------------------------------------------------------------------------------------------------------------------------------------------------------|
|  |  | <p> Tafazzin<br/> G-protein-signaling modulator<br/> Dystrophin<br/> ATP-binding cassette protein<br/> Putative DMBT1-like protein<br/> Alpha-hemoglobin stabilizing protein<br/> G-protein signaling<br/> Ankrd11 protein<br/> Charged multivesicular body protein<br/> Psmc11 protein<br/> Keratinocyte proline-rich protein<br/> Non-specific lipid-transfer protein<br/> Tubulin alpha chain<br/> Prolactin-2B1<br/> Side tail fiber<br/> HAUS augmin-like complex subunit 1<br/> Macrophage-expressed gene 1 protein<br/> Elongator complex protein<br/> Pinin<br/> Trafficking protein particle complex subunit<br/> A-kinase anchor protein<br/> LIM domain-containing protein<br/> SNO protein<br/> Cullin-5<br/> Gap junction protein<br/> Ribosomal RNA processing protein<br/> Wdr46 protein<br/> Ubiquitin-associated protein<br/> TD and POZ domain-containing protein 1-like<br/> UHRF1-binding protein 1-like<br/> Abcc8 protein<br/> G2/mitotic-specific cyclin-B3<br/> Required for excision 1-B domain-containing protein<br/> Androgen-dependent TFPI-regulating protein<br/> Fibrinogen alpha chain<br/> Tubulin epsilon and delta complex protein </p> |
|--|--|-----------------------------------------------------------------------------------------------------------------------------------------------------------------------------------------------------------------------------------------------------------------------------------------------------------------------------------------------------------------------------------------------------------------------------------------------------------------------------------------------------------------------------------------------------------------------------------------------------------------------------------------------------------------------------------------------------------------------------------------------------------------------------------------------------------------------------------------------------------------------------------------------------------------------------------------------------------------------------------------------------------------------------------------------------------------------------------------------------------------------------------------------------------------------------|

|  |  |                                                                                                                                                                                                                                                                                                                                                                                                                                                                                                                                                                                                                                                                                                                                                                                                                                                                                                                                                                                                                                                                                                                                                                      |
|--|--|----------------------------------------------------------------------------------------------------------------------------------------------------------------------------------------------------------------------------------------------------------------------------------------------------------------------------------------------------------------------------------------------------------------------------------------------------------------------------------------------------------------------------------------------------------------------------------------------------------------------------------------------------------------------------------------------------------------------------------------------------------------------------------------------------------------------------------------------------------------------------------------------------------------------------------------------------------------------------------------------------------------------------------------------------------------------------------------------------------------------------------------------------------------------|
|  |  | <p> Aqp6 protein<br/> Probable G-protein-coupled receptor<br/> HIRA-interacting protein<br/> Contactin-5<br/> Numa1 protein<br/> Nebulin<br/> Nucleolar GTP-binding protein<br/> 14-3-3 protein theta<br/> Microfibrillar-associated protein<br/> Clavesin-2<br/> Preferentially expressed antigen in melanoma-like protein<br/> Lethal(3)malignant brain tumor-like protein<br/> B-cell linker protein<br/> GPI inositol-deacylase<br/> Syndetin<br/> Immunoglobulin superfamily-containing leucine-rich repeat protein<br/> Upstream-binding factor 1-like protein<br/> F-actin-uncapping protein<br/> Cytohesin-3<br/> Acyl-CoA-binding protein<br/> Phosphatidylinositol-glycan biosynthesis class F protein<br/> Syncytin-A<br/> Cyclic nucleotide-binding domain-containing protein<br/> Golgin-45<br/> Dihydropyrimidinase-related protein<br/> Glyoxalase domain-containing protein<br/> Nuclear receptor-interacting protein<br/> Clustered mitochondria protein<br/> Amyloid-beta A4 precursor protein-binding family A member 3<br/> Dynamin-1-like protein<br/> Bloom syndrome protein homolog<br/> Usherin<br/> Nebulette<br/> FERM and PDZ domain </p> |
|--|--|----------------------------------------------------------------------------------------------------------------------------------------------------------------------------------------------------------------------------------------------------------------------------------------------------------------------------------------------------------------------------------------------------------------------------------------------------------------------------------------------------------------------------------------------------------------------------------------------------------------------------------------------------------------------------------------------------------------------------------------------------------------------------------------------------------------------------------------------------------------------------------------------------------------------------------------------------------------------------------------------------------------------------------------------------------------------------------------------------------------------------------------------------------------------|

|  |  |                                                                                                                                                                                                                                                                                                                                                                                                                                                                                                                                                                                                                                                                                                                                                                                                                                                                                                                                                                                                                                                                                                                                                                                                                                              |
|--|--|----------------------------------------------------------------------------------------------------------------------------------------------------------------------------------------------------------------------------------------------------------------------------------------------------------------------------------------------------------------------------------------------------------------------------------------------------------------------------------------------------------------------------------------------------------------------------------------------------------------------------------------------------------------------------------------------------------------------------------------------------------------------------------------------------------------------------------------------------------------------------------------------------------------------------------------------------------------------------------------------------------------------------------------------------------------------------------------------------------------------------------------------------------------------------------------------------------------------------------------------|
|  |  | <p> containing<br/> Slc24a4 protein<br/> Centrin-4<br/> Basic helix-loop-helix domain<br/> containing<br/> Phospholipid phosphatase-<br/> related protein type<br/> Sterile alpha motif domain-<br/> containing protein 9-like<br/> C-terminal-binding protein<br/> Polycystin-2<br/> SAP domain-containing<br/> ribonucleoprotein<br/> Parathyroid hormone-related<br/> protein<br/> Pgm2l1 protein<br/> Arrestin domain-containing<br/> protein<br/> Rsrc1 protein<br/> Tight junction protein<br/> Smg6 protein<br/> Membrane-spanning 4-domains<br/> subfamily A member 13<br/> Cysteine-rich perinuclear theca<br/> protein<br/> Receptor-transporting protein<br/> Epithelial-stromal interaction<br/> protein<br/> Nucleolar MIF4G domain-<br/> containing protein<br/> Cytochrome b<br/> Adenomatous polyposis coli<br/> protein<br/> Msx2-interacting protein<br/> Nibrin<br/> MAM and LDL-receptor class A<br/> domain-containing protein<br/> MHC H-2K-k protein<br/> MAP7 domain-containing<br/> protein<br/> Neuropeptide-like protein<br/> C4orf48 homolog<br/> Polyadenylate-binding protein-<br/> interacting protein<br/> NFX1-type zinc finger-<br/> containing protein<br/> Vesicle-associated membrane<br/> protein </p> |
|--|--|----------------------------------------------------------------------------------------------------------------------------------------------------------------------------------------------------------------------------------------------------------------------------------------------------------------------------------------------------------------------------------------------------------------------------------------------------------------------------------------------------------------------------------------------------------------------------------------------------------------------------------------------------------------------------------------------------------------------------------------------------------------------------------------------------------------------------------------------------------------------------------------------------------------------------------------------------------------------------------------------------------------------------------------------------------------------------------------------------------------------------------------------------------------------------------------------------------------------------------------------|

|  |  |                                                                                                                                                                                                                                                                                                                                                                                                                                                                                                                                                                                                                                                                                                                                                                                                                                                                                                                                                                                                                                                                                                                                                                |
|--|--|----------------------------------------------------------------------------------------------------------------------------------------------------------------------------------------------------------------------------------------------------------------------------------------------------------------------------------------------------------------------------------------------------------------------------------------------------------------------------------------------------------------------------------------------------------------------------------------------------------------------------------------------------------------------------------------------------------------------------------------------------------------------------------------------------------------------------------------------------------------------------------------------------------------------------------------------------------------------------------------------------------------------------------------------------------------------------------------------------------------------------------------------------------------|
|  |  | <p> Double C2 protein beta<br/> MutS protein homolog 5<br/> Cytoplasmic polyadenylation element-binding protein<br/> Mitochondrial uncoupling protein<br/> Neurexin-2<br/> Myh7 protein<br/> Bromodomain-containing protein<br/> Lpcat2 protein<br/> 28S ribosomal protein<br/> Small muscle protein<br/> Nf2 protein<br/> ZZ-type zinc finger-containing protein<br/> PHD and RING finger domain-containing protein<br/> Small muscle protein<br/> Scm polycomb group protein-like<br/> Cytospin-B<br/> GABA(A) receptor beta-1 subunit<br/> INO80 complex subunit E<br/> EF-hand and coiled-coil domain-containing protein<br/> Sperm autoantigenic protein<br/> Jouberin<br/> Mucolipin-1<br/> Histone-binding protein<br/> Protein unc-13 homolog B<br/> Nesprin-1<br/> Nuclear pore complex protein<br/> Cell cycle and apoptosis regulator protein<br/> C2 calcium-dependent domain-containing<br/> Phosphoinositide-3-kinase-interacting protein<br/> Contactin-3<br/> Ataxin-7<br/> SAGA-associated factor<br/> GREB1-like protein<br/> Spermatogenesis associated glutamate (E)-rich protein<br/> Protocadherin-16<br/> Junction-mediating and - </p> |
|--|--|----------------------------------------------------------------------------------------------------------------------------------------------------------------------------------------------------------------------------------------------------------------------------------------------------------------------------------------------------------------------------------------------------------------------------------------------------------------------------------------------------------------------------------------------------------------------------------------------------------------------------------------------------------------------------------------------------------------------------------------------------------------------------------------------------------------------------------------------------------------------------------------------------------------------------------------------------------------------------------------------------------------------------------------------------------------------------------------------------------------------------------------------------------------|

|  |  |                                                                                                                                                                                                                                                                                                                                                                                                                                                                                                                                                                                                                                                                                                                                                                                                                                                                                                                                                                                                                                                                                                                                                                                                     |
|--|--|-----------------------------------------------------------------------------------------------------------------------------------------------------------------------------------------------------------------------------------------------------------------------------------------------------------------------------------------------------------------------------------------------------------------------------------------------------------------------------------------------------------------------------------------------------------------------------------------------------------------------------------------------------------------------------------------------------------------------------------------------------------------------------------------------------------------------------------------------------------------------------------------------------------------------------------------------------------------------------------------------------------------------------------------------------------------------------------------------------------------------------------------------------------------------------------------------------|
|  |  | <p> regulatory protein<br/> UBX domain-containing protein<br/> SAP30-binding protein<br/> Arhgap4 protein<br/> Carabin<br/> Polypyrimidine tract-binding protein<br/> Meteorin-like protein<br/> GEM-interacting protein<br/> Juxtaposed with another zinc finger protein<br/> RanBP-type and C3HC4-type zinc finger-containing protein<br/> Caseinolytic peptidase B protein<br/> Phip protein<br/> Membrane-associated transporter protein<br/> Nestin<br/> Cathepsin W<br/> Phosducin-like protein<br/> Prickle planar cell polarity protein<br/> Mitogen-activated protein kinase-binding protein<br/> Vasodilator-stimulated phosphoprotein<br/> Testis-specific gene 10 protein<br/> Sushi, von Willebrand factor type A, EGF and pentraxin domain-containing protein<br/> Junctophilin-1<br/> Small subunit processome component 20 homolog<br/> Proline-rich protein<br/> Calcium uptake protein<br/> Cysteine-rich PDZ-binding protein<br/> Ccnb1 protein<br/> Catenin beta-1<br/> Neural proliferation differentiation and control protein<br/> Protein bicaudal C homolog FH1/FH2 domain-containing protein<br/> Ribosomal RNA-processing protein<br/> Zinc finger MYM-type protein </p> |
|--|--|-----------------------------------------------------------------------------------------------------------------------------------------------------------------------------------------------------------------------------------------------------------------------------------------------------------------------------------------------------------------------------------------------------------------------------------------------------------------------------------------------------------------------------------------------------------------------------------------------------------------------------------------------------------------------------------------------------------------------------------------------------------------------------------------------------------------------------------------------------------------------------------------------------------------------------------------------------------------------------------------------------------------------------------------------------------------------------------------------------------------------------------------------------------------------------------------------------|



|  |  |                     |
|--|--|---------------------|
|  |  | Talin-1<br>Macoilin |
|--|--|---------------------|

1. Y. Yang, S. Bernardi, H. Song, J. Zhang, M. Yu, J. C. Reid, E. Strounina, D. J. Searles and C. Yu, *Chemistry of Materials*, 2016, **28**, 704-707.
2. Y. Hong, Y. Yao, H. Zhao, Q. Sheng, M. Ye, C. Yu and M. Lan, *Analytical Chemistry*, 2018, **90**, 7617-7625.
3. H. Singh, Gutwein, Rule, Knapik, Moudgil B, Grobmyer S, Brown S. , *Int J Nanomedicine*, 2012, **7**, 2739-2750.
4. J. R. Wiśniewski, A. Zougman, N. Nagaraj and M. Mann, *Nature Methods*, 2009, **6**, 359-362.
5. M. S. Khodadoust, N. Olsson, L. E. Wagar, O. A. W. Haabeth, B. Chen, K. Swaminathan, K. Rawson, C. L. Liu, D. Steiner, P. Lund, S. Rao, L. Zhang, C. Marceau, H. Stehr, A. M. Newman, D. K. Czerwinski, V. E. H. Carlton, M. Moorhead, M. Faham, H. E. Kohrt, J. Carette, M. R. Green, M. M. Davis, R. Levy, J. E. Elias and A. A. Alizadeh, *Nature*, 2017, **543**, 723-727.
6. A. V. Filatov, G. I. Krotov, V. G. Zgoda and Y. Volkov, *J Immunol Methods*, 2007, **319**, 21-33.
